# Supplementary material for: Intellectual disability and mental health problems: a qualitative study of general practitioners’ views
Source: PubMed Central journal article supplement — BMJ Open. 2013 Mar 6;3(3):e002283. doi: 10.1136/bmjopen-2012-002283 (PMC3612780; doi:10.1136/bmjopen-2012-002283), 2013-03-06
Supplement: bmjopen-2012-002283.draft_revisions.pdf [file bmjopen-2012-002283.draft_revisions.pdf]

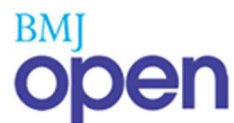

**Intellectual disability and mental health problems:  
a qualitative study of general practitioners' views**

|                                 |                                                                                                                                                                                                                                                                                                                                            |
|---------------------------------|--------------------------------------------------------------------------------------------------------------------------------------------------------------------------------------------------------------------------------------------------------------------------------------------------------------------------------------------|
| Journal:                        | <i>BMJ Open</i>                                                                                                                                                                                                                                                                                                                            |
| Manuscript ID:                  | bmjopen-2012-002283                                                                                                                                                                                                                                                                                                                        |
| Article Type:                   | Research                                                                                                                                                                                                                                                                                                                                   |
| Date Submitted by the Author:   | 30-Oct-2012                                                                                                                                                                                                                                                                                                                                |
| Complete List of Authors:       | Fredheim, Terje; Sykehuset Innlandet, Religionspsykologisk senter Haavet, Ole; University of Oslo, Department of General Practice Danbolt, Lars; Innlandet Hospital Trust, Psychology of religion Kjøsberg, Kari; Innlandet Hospital Trust, Psychology of religion Lien, Lars; University of Oslo, Division of Mental Health and Addiction |
| <b>Primary Subject Heading</b>: | General practice / Family practice                                                                                                                                                                                                                                                                                                         |
| Secondary Subject Heading:      | Qualitative research, Mental health                                                                                                                                                                                                                                                                                                        |
| Keywords:                       | Intellectual disability, General practice, MENTAL HEALTH, Challenging behaviour, QUALITATIVE RESEARCH                                                                                                                                                                                                                                      |
|                                 |                                                                                                                                                                                                                                                                                                                                            |

SCHOLARONE™  
Manuscripts

1  
2  
3 **Intellectual disability and mental health problems:**  
4  
5  
6 **a qualitative study of general practitioners' views**  
7  
8  
9

10 Terje Fredheim<sup>1,4\*</sup>, Ole R Haavet<sup>4</sup> Lars J Danbolt<sup>1,3</sup>, Kari Kjønnsberg<sup>1</sup>, Lars Lien<sup>1,2</sup>,  
11  
12

13  
14  
15 <sup>1</sup>Centre for Psychology of Religion, Innlandet Hospital Trust (SIHF), Hamar, Norway  
16

17 <sup>2</sup> Division of Mental Health and Addiction, Oslo University Hospital, and University of Oslo,  
18  
19 Oslo, Norway  
20

21 <sup>3</sup>Norwegian School of Theology, Oslo, Norway  
22

23 <sup>4</sup>Department of General Practice, University of Oslo, Oslo, Norway  
24  
25  
26  
27

28  
29 \* Corresponding Author:  
30

31 Terje Fredheim, Religionspsykologisk Senter, Postboks 68, N-2312 Ottestad  
32

33 E-mail: [terje.fredheim@sykehuset-innlandet.no](mailto:terje.fredheim@sykehuset-innlandet.no)  
34

35 Phone: 0047 - 41219155  
36  
37  
38  
39  
40  
41  
42  
43  
44  
45  
46  
47  
48  
49  
50  
51  
52  
53  
54  
55  
56  
57  
58  
59  
60

## Article summary

### Article focus

- The aim of this study was to investigate the general practitioners (GPs) experiences in handling people with intellectual disabilities and mental/behavioural problems (MBP) in order to identify factors related to high quality services, important areas for improvement and suggest fields for further exploration.

### Key messages

- This study shows that GPs have different opinions on central subjects in providing high quality services to people with ID and MBP.
- Even GPs with an assumed high competence and engagement in this patient group, lack evidence based knowledge and base their actions on experience based practice.
- GPs are concerned about the competence in specialist departments when it comes to treatment of MBP in people with ID

### Strengths and limitations in this study

- Participants were of both genders, from several localities and had a broad range of patients with ID and MBP.
- As far as we know, this is the only study that has addressed GPs experiences with people with ID and MBP.
- Although data across participants were found sufficient, a small group of participants were interviewed.

## Abstract

**Objectives** To investigate general practitioners' (GPs) experiences in handling people with intellectual disabilities (ID) and mental and behavioural problems (MBP).

**Design** Qualitative study using in-depth interviews.

**Setting** General practice in Hedmark County, Norway.

**Participants** 10 GPs were qualitatively interviewed about their professional experience regarding people with ID and MBP. Data were analysed by all authors using systematic text condensation.

**Results** The participants' knowledge was primarily experience based and collaboration with specialists seemed to be individual rather than systemic. The GPs provided different meanings for referral, treatment, collaboration, regular health checks and home visits.

**Conclusions** GPs are in a position to provide evidence-based and individual treatment for both psychological and somatic problems among people with ID. This potential is not yet fully exploited. The findings in this study provide useful information for further research in the field.

## Introduction

People with intellectual disabilities (ID) are particularly vulnerable to health problems and experience difficulties in meeting their health care needs.<sup>1-7</sup> Two recent attempts provide a focus to this challenge: a consensus manifesto by the European Association of Intellectual Disability Medicine<sup>8</sup> and an independent inquiry on a request from the British Secretary of State for Health.<sup>9</sup> These reports share the goal of improving health care services for people with ID, but the extent to which their recommendations have been implemented remains dubious. A recent meta-analysis has shown that the prevalence of ID is approximately 1%.<sup>10</sup> Prevalence of mental health problems among people with ID vary in different studies from 14% to 60% and can be difficult to identify and diagnose.<sup>11</sup> There is considerable overlap between mental health problems and challenging behaviour<sup>12,13</sup>; these two complications are often inseparable, suggesting that there is little to gain from distinguishing between them when trying to identify implications for health workers.

To detect and treat people with ID and mental and behaviour problems (MBP) is a test of the competence of the general practitioner (GP). Doctors specialising in general practice acquire knowledge about the early and general presentation of diseases, and early treatment and follow-up of chronic disease. GPs play a central role because of their familiarity with other primary health care services, as gate-keepers to specialist health care and in evaluating treatment and cooperate with the patient, family and other service providers.<sup>14-17</sup>

Each Norwegian GP has 5 to 10 patients with ID on their list. Some of these patients will have MBP, which potentially influences their physical health, including poor diet; erratic compliance with medication; and behaviour that can affect physical health, creating the need for close care and structure in health services.<sup>18</sup>

1  
2  
3 The importance of closely monitored care and high-quality health services to meet the  
4 challenge of inequality in health services for people with ID have provided the focus for  
5 several papers.<sup>1,4,6,7,19</sup> There is however few studies that have looked at the way GPs are  
6  
7  
8 working with patients with ID and MBP. The aim of our research was to explore the  
9  
10 experiences, competence, attitudes and role of GPs providing health services to people with  
11  
12 ID, with a special focus on people with ID and MBP.  
13  
14  
15

## 16 17 **METHODS**

### 18 19 **A qualitative method**

20  
21 We opted for a qualitative approach, in order to obtain more detailed descriptions of the GPs'  
22  
23 experiences serving people with ID and MBP. In-depth interviews are suitable in inquiring  
24  
25 about the GP's experiences, facilitating a deeper understanding of their opinions and  
26  
27 attitudes.<sup>20,21</sup> We preferred open interviews to focus on each participant's descriptions and  
28  
29 experiences, and bringing narratives into the method, by giving participants the opportunity to  
30  
31 provide meaning to their responses.  
32  
33  
34  
35  
36  
37

### 38 39 **Participants**

40  
41 Data were drawn from a total of 10 interviews with 10 participating GPs aged 41 to 64 (table  
42  
43 1). Participants were chosen following recommendations from an acknowledged senior  
44  
45 psychiatrist with more than 30 years of experience with ID patients in collaboration with GPs  
46  
47 in Hedmark County. There are 173 GPs in Hedmark, and the senior psychiatrist considered 25  
48  
49 of them to have more than the usual level of experience with ID patients and a relatively large  
50  
51 number of ID patients on their list. A letter was sent to 15 of these GPs, purposefully selected  
52  
53 with regard to geographical location and gender. It was estimated that a sample size of 7 to 10  
54  
55 participants would be required to achieve sufficient data and identify key themes. Of these 15,  
56  
57  
58  
59  
60

10 GPs were able to participate, 3 GPs refused to participate, and 2 GPs did not respond. Participation in this study was voluntary, and each participant signed an informed consent form, and was informed of their right to withdraw from the study at any time, without further explanation.

TABLE 1

| Participant number | Age | Gender | Location | Total number of patients | Approximate number of ID patients | Reported number. of ID patients with psychiatric/ behavioural challenge |
|--------------------|-----|--------|----------|--------------------------|-----------------------------------|-------------------------------------------------------------------------|
| 1                  | 58  | F      | Rural    | 950                      | 6                                 | 2                                                                       |
| 2                  | 61  | M      | City     | 1200                     | 3                                 | 2                                                                       |
| 3                  | 60  | M      | Rural    | 800                      | 14                                | 4                                                                       |
| 4                  | 64  | M      | City     | 2500                     | 20                                | 10                                                                      |
| 5                  | 60  | M      | Rural    | 750                      | 15                                | 6                                                                       |
| 6                  | 61  | M      | City     | 1000                     | 5                                 | ?                                                                       |
| 7                  | 60  | M      | City     | 1100                     | 30                                | 20                                                                      |
| 8                  | 42  | F      | Rural    | 850                      | 7                                 | 3                                                                       |
| 9                  | 59  | M      | Rural    | 1000                     | 12                                | 6                                                                       |
| 10                 | 41  | F      | Rural    | 1300                     | 10                                | 5                                                                       |

*Participants' number, age, gender, location, total number of patients, approximately number of patients with ID, and reported number of ID-patients with mental or behavioural problems*

## Setting

All 10 interviews were conducted in the GPs' offices, and lasted 41–81 minutes, with a mean of 57 minutes. Interviews were conducted from October to November 2011 and were audio recorded. All but one interview was conducted by two of the authors (TF and KK) and consisted of open-ended questions based on an interview guide with two main questions:

1. What are your experiences with ID patients who have additional mental health problems and/or challenging behaviour?
2. What do you think is the GP's role for these patients?

1  
2  
3 The additional checklist was used to gather information that was otherwise missing or  
4 to provide greater depth or breadth to incomplete information. Typical follow-up questions  
5 addressed the number of patients in the GP's patient group, collaborative partners, if regular  
6 health checks were provided and attitude towards psychotropic treatment of challenging  
7 behaviour.  
8  
9  
10  
11  
12

## 13 **Analysis**

14  
15 The interviewers made field notes with the participants' frequently used words, phrases and  
16 other statements requiring follow-up. Pauses, engagement, laughter and gestures were also  
17 noted, and the field notes were used in addition to the total transcripts. Analysis of transcripts  
18 was conducted using systematic text condensation.<sup>20,22,23</sup> The first author read the transcripts  
19 several times to obtain a sense of the whole. The other authors independently read the  
20 transcripts and identified meaningful units, themes and subthemes, trying to capture the  
21 "essential expression". These findings were discussed among the authors.  
22  
23  
24  
25  
26  
27  
28  
29  
30  
31  
32

## 33 **RESULTS**

34  
35 During the interview, GPs described their experiences, consultations and collaboration with a  
36 variety of relatives and professionals. Case presentations included descriptions of ID patients  
37 with complex medical, psychiatric and behavioural challenges. As a model of analysis, the  
38 process of a consultation emerged from the material as the best description of the GPs'  
39 experiences with this group of patients (figure 1). This model illustrates a GP's pathway  
40 through a consultation with four main categories: basis for decisions, consultation, treatment  
41 and follow-up.  
42  
43  
44  
45  
46  
47  
48  
49  
50  
51

52  
53 -----  
54  
55 Figure 1 approximately here  
56  
57 -----  
58  
59  
60



## Basis for decisions

The main category, *basis for decisions*, epitomizes the GP's knowledge and experience in the context of the patient group and describes their medical education, experiences, courses and relevant post-graduate education on this topic. The GPs described limited training in patients with ID from their medical school or post-graduate courses. None of them had knowledge of the Norwegian Medical Association's Internet-based course on the topic. There was no mention of articles, books or peer-reviewed journals on the topic:

*I think... those medications that I am used to prescribing, and that I know are effective in any or another way, I will use them as a common guideline. (GP #1)*

*I have common knowledge about patients and psychiatry. I have a large number of patients and I have years of experience. (GP #4)*

Knowledge of the patient and continuity in the relationship between patient and physician were seen as key issues in providing the best service. Furthermore these GPs saw the advantage of being a family doctor, improving the relationship to the patients allowing the GP to make a better job of evaluating the biological, psychological and social strengths of the patients. As one participant said:

*The family will be a support system for the patient anyway, so I see this as a great advantage. (GP #6)*

A key finding in this category is that most of the treatment is founded on experience-based knowledge. The material was rich in descriptions of patient histories, organisational

1  
2  
3 system changes and historical events in the ID health care service, together with private  
4 memories from childhood or random meetings with people with intellectual disability.  
5  
6 Because experiences are individual, there were many different stories, opinions and points of  
7  
8 view.  
9  
10

11  
12  
13  
14 *Already in primary school I went to a school where people with ID were integrated.*

15  
16 *Having contact with people with ID has never been strange or unfamiliar for me. (GP*  
17  
18 *#8)*  
19

## 20 21 22 23 24 **Consultation**

25  
26 The second main category, *consultation*, covers type of consultation, communication and  
27 individual routines or rituals by either the GP or the patient. First there are descriptions of  
28 various types of consultations which can occur in either the office or the patient's home: acute  
29 consultation, planned evaluations of treatment and prescriptions, and health checks. The GPs  
30 varied in their opinions about the benefits and possibilities of seeing the patient at home, as  
31 quotes from these two doctors illustrate:  
32  
33  
34  
35  
36  
37  
38  
39

40  
41  
42 *Home visits are soon to become a closed chapter in general practice, but with these*  
43 *patients I find it necessary to do home visits. Then I can see with my own eyes how*  
44 *things appear at home (GP #5).*  
45  
46  
47  
48

49  
50  
51 *They need to be observed and... it is not always easy for a GP to be able to observe. A*  
52 *GP should stay in the office and be available for patients (GP #4).*  
53  
54  
55  
56  
57  
58  
59  
60

1  
2  
3 Furthermore the GPs have different opinions about the benefits and possibilities of regular  
4 health checks for this patient group. Lack of standard guidelines opens the door for individual  
5 solutions and a variety of explanations. One participant highlighted this patient group as bad  
6 requesters of health care, requiring closer follow-up:  
7  
8  
9  
10

11  
12  
13  
14 *We may not be optimally good at this, but we try to do it once a year, and that is about*  
15 *were it ends. Some have a health problem that leads to more frequent consultations; in*  
16 *those cases a yearly health control is less important. But in general these are patients*  
17 *who don't tend to promote themselves. (GP #9)*  
18  
19  
20  
21  
22  
23  
24

25 Communication and observation is another cluster of experiences in this category.  
26  
27 Some of these patients are obviously anxious about a consultation, and all GPs said that their  
28 focus was on the patient, communicating directly with the ID patients, even though they were  
29 accompanied by others. If something could not be done because of unwillingness or  
30 restlessness, they did not push the patient, but booked another appointment in the near future.  
31  
32  
33  
34  
35

36 There were many descriptions of patients who went through special routines and  
37 rituals in their GP's office. It seemed to be important for the relationship between the GP and  
38 the patient that these routines be followed; the patient tended to be calmer allowing the doctor  
39 to undertake the necessary investigations. As one participant said:  
40  
41  
42  
43  
44  
45  
46

47 *He is sitting here, takes a glass of water, sits down again and drinks some water.*  
48  
49 *Sometimes I am able to check his blood pressure and do blood tests. He was not able*  
50 *to do that with his previous GP (GP #1).*  
51  
52  
53  
54  
55  
56  
57  
58  
59  
60

1  
2  
3 Our participants argued that their patients' should be accompanied by someone who knows  
4 the patient, their medical history and the reason for the consultation. Yet patients with  
5 communication problems were sometimes accompanied to the doctor's office by health  
6 workers with limited knowledge of the patient. Because GPs must rely on information from  
7 accompanying persons, they would sometimes send the patient home with a new appointment.  
8  
9 As one participant said:

10  
11  
12  
13  
14  
15  
16  
17  
18 *It is essential that we have confidence in the information we are given. And that it is*  
19 *not exaggerated, hyped or trivialized, but is a sober description that it is possible for*  
20 *me as a GP to navigate towards (GP #7).*  
21  
22  
23  
24  
25  
26

27 Some participants were more likely to use systematic consultations and follow-up,  
28 especially if the patient had chronic somatic problems. Nevertheless, the somatic problem,  
29 rather than the ID and MBP constituted the main reason for systematic and frequent  
30 consultations.  
31  
32  
33  
34  
35  
36

## 37 **Treatment**

38  
39 This third main category covers the two choices the GP must make in trying to solve the  
40 patient's medical or mental health problem: to treat the patient or refer to a specialist. The  
41 participants expressed insecurity about how to treat and what to do with these patients. They  
42 described types and possibilities when they wanted to treat the patient themselves following  
43 these justifications: i) lack of confidence that a specialist would do the best job with these  
44 patients or ii) they believed the referral would be refused by the specialists' health services.  
45  
46 This participant illustrates the lack of confidence in specialist services, and trust in own  
47 competence:  
48  
49  
50  
51  
52  
53  
54  
55  
56  
57  
58  
59  
60

1  
2  
3 *I have to call a random chief doctor at the local psychiatric institution, because that is*  
4 *what the habilitation services relies on... then I think I will do this better by myself.*

5  
6  
7 (GP #5)  
8  
9

10  
11  
12 There were descriptions of all types of treatment, including check for somatic reasons for  
13 restlessness, behaviour modification, environmental actions and medical treatment. When the  
14 participants' referred these patients to specialist health services for their MBP, it was mainly  
15 for diagnostic work or medication queries. It was more common for the GPs to mention the  
16 name of a specialist rather than a specialist department.  
17  
18  
19  
20  
21

22  
23  
24  
25 *If I wanted to refer a patient with these problems, NN was the person. (GP #3)*  
26  
27

28  
29 *NN2, a psychiatrist with long experience, is easy to turn to, because he provides good*  
30 *answers to my questions. (GP #8)*  
31  
32  
33

34  
35  
36 Some of the GPs interviewed had created a private system to ensure systematic  
37 follow-up: prescribing medication over the short term and developing exclusive lists with  
38 patient data and consultation frequency.  
39  
40  
41  
42

### 43 **Evaluation and continuing treatment**

44  
45  
46 This fourth main category constitutes a cluster of descriptions covering collaboration,  
47 evaluation of treatment effects and routines for follow-up consultations. The participants  
48 reported their experiences with collaborative partners – particularly how they evaluated the  
49 effects of psychotropic medication.  
50  
51  
52

53  
54  
55 This group of patients nearly always involves one or more collaborative partners.  
56  
57 There were descriptions of meetings with parents, community mental health workers,  
58  
59  
60

1  
2  
3 psychiatrists, psychologists and nursing home employees, but they differed in type, in the  
4  
5 frequency of the GPs' attendance and in the priority they placed on them.  
6  
7

8  
9  
10 *I try to attend every primary meeting with collaborative partners. (GP #9)*  
11

12  
13  
14 *I am not often called in to primary meetings. I am, in a few cases, where medical*  
15  
16 *issues are central. (GP #7)*  
17

18  
19  
20 The GPs usually found meetings with collaborators useful, despite the fact that most of these  
21  
22 meetings dealt with issues far from the GPs' areas of expertise. They also described meetings  
23  
24 in which specific parts were structured towards their attendance. The feeling of being left  
25  
26 alone was mentioned by several participants, but one participant was particularly clear about  
27  
28 it:  
29  
30

31  
32  
33  
34 *I feel really alone on this topic with these patients. I don't really know what to do. (GP*  
35  
36 *#10)*  
37

38  
39  
40 The participants admit facing challenges in evaluating the effects of psychotropic  
41  
42 medication. Some argued for systematic evaluation of and specific feedback on their patients'  
43  
44 behaviour by parents or health care workers, in order to assess the effect of medication:  
45  
46

47  
48  
49 *I need observations and detailed feedback. There's no point in continuing a treatment*  
50  
51 *if it isn't effective. Systematic feedback is the required way of working. (GP #7)*  
52  
53

54  
55  
56 Others wanted a standard feedback sheet:  
57  
58  
59  
60

1  
2  
3  
4  
5 *Then you can have a summary over a longer time perspective, rather than some*  
6 *random reports. But I don't know where to get these schemes. (GP #10)*  
7  
8  
9

10  
11 As schemes or more objective feedback forms were not often provided, the participants were  
12 forced to rely upon normative assessments provided by accompanying health workers or  
13 parents.  
14  
15  
16  
17

## 18 19 **DISCUSSION**

### 20 21 **Summary of main findings**

22  
23  
24  
25  
26 The results in this study highlight the complexity of providing GP services to people with ID  
27 and MBP. The GPs interviewed in this study were strategically selected and were expected to  
28 have above-average engagement and competence with this patient group. Evidence-based  
29 medicine requires a combination of clinical expertise, best available external evidence and  
30 individual patient needs and choices.<sup>24</sup> The competence of the participants in this study is  
31 generally experience-based on this topic and therefore characterised by individual opinions  
32 and ways of working. It is noteworthy that our participants provided examples of people with  
33 ID that they had met in private settings and told us how they found these experiences relevant  
34 for their practice with this patient group.  
35  
36  
37  
38  
39  
40  
41  
42  
43  
44  
45

### 46 47 **Strengths and limitations of the study**

48  
49 The participants in this study were strategically selected, thereby representing a relatively  
50 homogenous group. This situation creates an obvious threat to external validity, and may limit  
51 the generalisation of our results. Nevertheless the interviewees revealed diverse opinions and  
52 descriptions of their handling of ID patients with MBP, thereby strengthening our impression  
53  
54  
55  
56  
57  
58  
59  
60

1  
2  
3 that this is an important research topic, albeit rarely investigated or highlighted in national or  
4  
5 international settings. Everyone in our research group has read and analysed the transcripts  
6  
7 and independently noted meaningful units. The group comprises researchers and clinicians  
8  
9 from several areas, thereby limiting the threat of a subjective finding with idiosyncratic  
10  
11 perspectives and limited objective value. Our findings can be transferred to clinical situations  
12  
13 and can provide a good starting point for further research in the field.  
14  
15

### 16 17 **Comparison with existing literature**

18  
19 There is no hard evidence for the necessity and efficacy of using psychotropic medication for  
20  
21 treating MBP in people with ID.<sup>25-27</sup> The fact that none of the GPs interviewed could mention  
22  
23 any scientific paper that addresses this problem supports the finding that this as an  
24  
25 experience-based field, in which doctors rely on general competence valid for people without  
26  
27 ID. This is a noteworthy result, especially given the assumption that 70% of psychotropic  
28  
29 medication to this patient group is prescribed by the GP alone, without collaboration with a  
30  
31 psychiatrist.<sup>28,29</sup>  
32  
33  
34  
35

### 36 37 **Implications for future research and clinical practice**

38  
39 The results demonstrate a major challenge to treatment of MBP in this patient group: None of  
40  
41 the participants was sure how to treat these patients themselves, yet they were unsure where to  
42  
43 refer their patients if they found the situation too complicated for primary health care  
44  
45 treatment alone. They tended to distrust specialist health services. In some areas of the county,  
46  
47 the GPs mentioned a local hospital psychiatrist, and other participants mentioned specific  
48  
49 persons with whom they could collaborate. All in all, these statements serve to underline the  
50  
51 importance of knowledge and information exchange between potential collaborative partners.  
52  
53

54  
55 Our study shows that GPs' handling of patients with ID and MBP is primarily based  
56  
57 upon experience-based knowledge – as told explicitly and as demonstrated through individual  
58  
59  
60



1  
2  
3 descriptions of handling and treatment. The GPs' opinions about their handling of ID patients  
4  
5 is based on their own experience with this patient group, and with their general competence  
6  
7 related to patients without ID. Attention should be focused on the ways in which medical  
8  
9 training and post-graduate education can fill the competence gap, to ensure that this field  
10  
11 becomes evidence-based rather than merely experience-based.  
12  
13  
14  
15  
16  
17  
18  
19  
20  
21  
22  
23  
24  
25  
26  
27  
28  
29  
30  
31  
32  
33  
34  
35  
36  
37  
38  
39  
40  
41  
42  
43  
44  
45  
46  
47  
48  
49  
50  
51  
52  
53  
54  
55  
56  
57  
58  
59  
60

For peer review only

1  
2  
3 The authors would like to thank the GPs for their participation. We gratefully acknowledge  
4 the fact that the research is funded by The Norwegian Medical Association, but the views  
5 expressed are those of the authors alone.  
6  
7  
8  
9

## 10 **Acknowledgements**

11  
12 The authors would like to thank the GP's for participating.  
13  
14

## 15 **Funding**

16  
17 This study was funded by the Norwegian Medical Association. The funding body had no  
18 involvement in the research process or in the writing of this article.  
19  
20  
21  
22  
23

## 24 **Competing interests**

25  
26 All authors have completed the ICMJE uniform disclosure form at  
27 [www.icmje.org/coi\\_disclosure.pdf](http://www.icmje.org/coi_disclosure.pdf) (available on request from the corresponding author) and  
28 declare: no support from any organisation for the submitted work; no financial relationships  
29 with any organisations that might have an interest in the submitted work in the previous three  
30 years; and no other relationships or activities that could appear to have influenced the  
31 submitted work.  
32  
33  
34  
35  
36  
37  
38  
39  
40

## 41 **Ethics approval**

42  
43 The Norwegian regional committee for medical research approved this study.  
44  
45  
46

## 47 **Contributors**

48  
49 TF contributed to acquisition of data, transcription, analysing data, drafting and critical  
50 revision of the article and approval of the final version. ORH, LJD and LL contributed to the  
51 design of the study, analysing data, critical revision of the article and approval of the final  
52  
53  
54  
55  
56  
57  
58  
59  
60

1  
2  
3 version. KK participated in the interviews, analysing data, critical revision of the article and  
4  
5 approval of the final version.  
6  
7

### 8 **Data sharing** 9

10 No additional data available.  
11  
12  
13  
14  
15  
16  
17  
18  
19  
20  
21  
22  
23  
24  
25  
26  
27  
28  
29  
30  
31  
32  
33  
34  
35  
36  
37  
38  
39  
40  
41  
42  
43  
44  
45  
46  
47  
48  
49  
50  
51  
52  
53  
54  
55  
56  
57  
58  
59  
60

For peer review only

## References

- 1 Balogh R, Ouellette-Kuntz H, Bourne L, et al. Organising health care services for persons with an intellectual disability. *Cochrane Database Syst Rev* 2008;(4):CD007492.
- 2 Wullink M, Veldhuijzen W, Lantman-de Valk HM, et al. Doctor-patient communication with people with intellectual disability--a qualitative study. *BMC Fam Pract* 2009;10:82.
- 3 Baxter H, Lowe K, Houston H, et al. Previously unidentified morbidity in patients with intellectual disability. *Br J Gen Pract* 2006 Feb;56(523):93-8.
- 4 Felce D, Baxter H, Lowe K, et al. The impact of checking the health of adults with intellectual disabilities on primary care consultation rates, health promotion and contact with specialists. *Journal of Applied Research in Intellectual Disabilities* 2008;21:597-602.
- 5 Kwok H, Cheung PW. Co-morbidity of psychiatric disorder and medical illness in people with intellectual disabilities. *Curr Opin Psychiatry* 2007 Sep;20(5):443-9.
- 6 Straetmans JM, van Schrojenstein Lantman-de Valk HM, Schellevis FG, et al. Health problems of people with intellectual disabilities: the impact for general practice. *Br J Gen Pract* 2007 Jan;57(534):64-6.

- 1  
2  
3 7 van Schrojenstein Lantman-de Valk HM, Walsh PN. Managing health problems in  
4  
5 people with intellectual disabilities. *BMJ* 2008;337:a2507.  
6  
7  
8  
9 8 Scholte FA. European Manifesto: basic standards of healthcare for people with  
10  
11 intellectual disabilities. *Salud Publica Mex* 2008;50 Suppl 2:s273-s276.  
12  
13  
14  
15 9 Michael J. Healthcare for All: Report of the Independent Inquiry into Access to  
16  
17 Healthcare for People with Learning Disabilities. London: Aldridge Press; 2008.  
18  
19  
20  
21  
22 10 Maulik PK, Mascarenhas MN, Mathers CD, et al. Prevalence of intellectual disability: a  
23  
24 meta-analysis of population-based studies. *Res Dev Disabil* 2011 Mar;32(2):419-36.  
25  
26  
27  
28 11 Kerker BD, Owens PL, Zigler E, et al. Mental health disorders among individuals with  
29  
30 mental retardation: challenges to accurate prevalence estimates. *Public Health Rep* 2004  
31  
32 Jul;119(4):409-17.  
33  
34  
35  
36  
37 12 Allen D. The relationship between challenging behaviour and mental ill-health in people  
38  
39 with intellectual disabilities: a review of current theories and evidence. *J Intellect*  
40  
41 *Disabil* 2008 Dec;12(4):267-94.  
42  
43  
44  
45 13 Holden B, Gitlesen JP. The overlap between psychiatric symptoms and challenging  
46  
47 behaviour: a preliminary study. *Res Dev Disabil* 2009 Mar;30(2):210-8.  
48  
49  
50  
51  
52 14 Berardi D, Bortolotti B, Menchetti M, et al. Models of collaboration between general  
53  
54 practice and mental health services in Italy. *The European Journal of Psychiatry*  
55  
56 2007;21:79-84.  
57  
58  
59  
60

- 1  
2  
3 15 Fredheim T, Lien L, Danbolt LJ, et al. Experiences with general practitioners described  
4 by families of children with intellectual disabilities and challenging behaviour: a  
5 qualitative study. *BMJ Open* 2011;1(2):e000304.  
6  
7  
8  
9  
10  
11 16 Fredheim T, Danbolt LJ, Haavet OR, et al. Collaboration between General Practitioners  
12 and mental health care professionals: a qualitative study. *Int J Ment Health Syst* 2011  
13 May 23;5(1):13.  
14  
15  
16  
17  
18  
19  
20 17 Younes N, Gasquet I, Gaudebout P, et al. General Practitioners' opinions on their  
21 practice in mental health and their collaboration with mental health professionals. *BMC*  
22 *Fam Pract* 2005 May 2;6(1):18.  
23  
24  
25  
26  
27  
28  
29 18 Hassiotis A, Barron DA, Hall IS. Intellectual disability psychiatry: a practical handbook.  
30 Chichester, West Sussex, England; Wiley-Blackwell; 2009.  
31  
32  
33  
34  
35 19 Neville BG. Mental health services for people with learning disabilities. Medical needs  
36 are important too. *BMJ* 2001 Feb 3;322(7281):302.  
37  
38  
39  
40  
41 20 Kvale S, Brinkmann S. Interviews: learning the craft of qualitative research  
42 interviewing. Los Angeles, Calif.: Sage; 2009.  
43  
44  
45  
46  
47  
48 21 Malterud K. The art and science of clinical knowledge: evidence beyond measures and  
49 numbers. *Lancet* 2001 Aug 4;358(9279):397-400.  
50  
51  
52  
53  
54 22 Giorgi A. Phenomenology and psychological research: essays. Pittsburgh, Pa.:  
55 Duquesne University Press; 1985.  
56  
57  
58  
59  
60

- 1  
2  
3 23 Giorgi A. The descriptive phenomenological method in psychology: a modified  
4  
5 Husserlian approach. Pittsburgh: Duquesne university press; 2009.  
6  
7  
8  
9 24 Sackett DL, Rosenberg WM, Gray JA, et al. Evidence based medicine: what it is and  
10  
11 what it isn't. *BMJ* 1996 Jan 13;312(7023):71-2.  
12  
13  
14  
15 25 Brylewski J, Duggan L. Antipsychotic medication for challenging behaviour in people  
16  
17 with learning disability. *Cochrane Database Syst Rev* 2004;(3):CD000377.  
18  
19  
20  
21 26 Matson JL, Bamburg JW, Mayville EA, et al. Psychopharmacology and mental  
22  
23 retardation: a 10 year review (1990-1999). *Res Dev Disabil* 2000 Jul;21(4):263-96.  
24  
25  
26  
27  
28 27 Tyrer P, Oliver-Africano PC, Ahmed Z, et al. Risperidone, haloperidol, and placebo in  
29  
30 the treatment of aggressive challenging behaviour in patients with intellectual disability:  
31  
32 a randomised controlled trial. *Lancet* 2008 Jan 5;371(9606):57-63.  
33  
34  
35  
36  
37 28 Baasland G, Engedal K. [Use of psychotropic medication among individuals with  
38  
39 mental retardation]. *Tidsskr Nor Laegeforen* 2009 Sep 10;129(17):1751-3.  
40  
41  
42  
43 29 Holden B, Gitlesen JP. Psychotropic medication in adults with mental retardation:  
44  
45 prevalence, and prescription practices. *Res Dev Disabil* 2004 Nov;25(6):509-21.  
46  
47  
48  
49  
50  
51  
52  
53  
54  
55  
56  
57  
58  
59  
60

1  
2  
3  
4  
5  
6  
7  
8  
9  
10  
11  
12  
13  
14  
15  
16  
17  
18  
19  
20  
21  
22  
23  
24  
25  
26  
27  
28  
29  
30  
31  
32  
33  
34  
35  
36  
37  
38  
39  
40  
41  
42  
43  
44  
45  
46  
47  
48  
49  
50  
51  
52  
53  
54  
55  
56  
57  
58  
59  
60

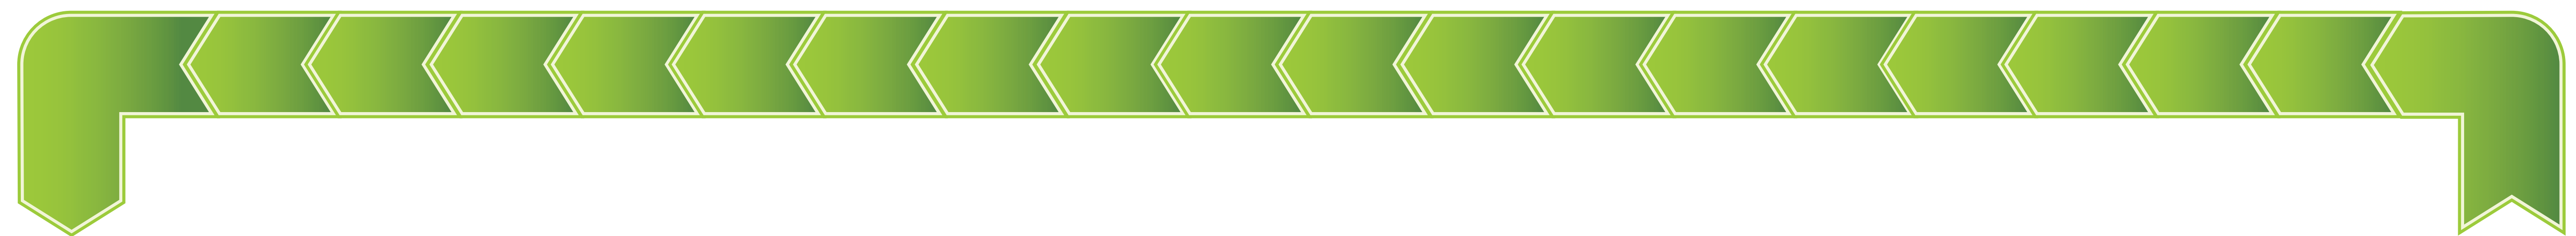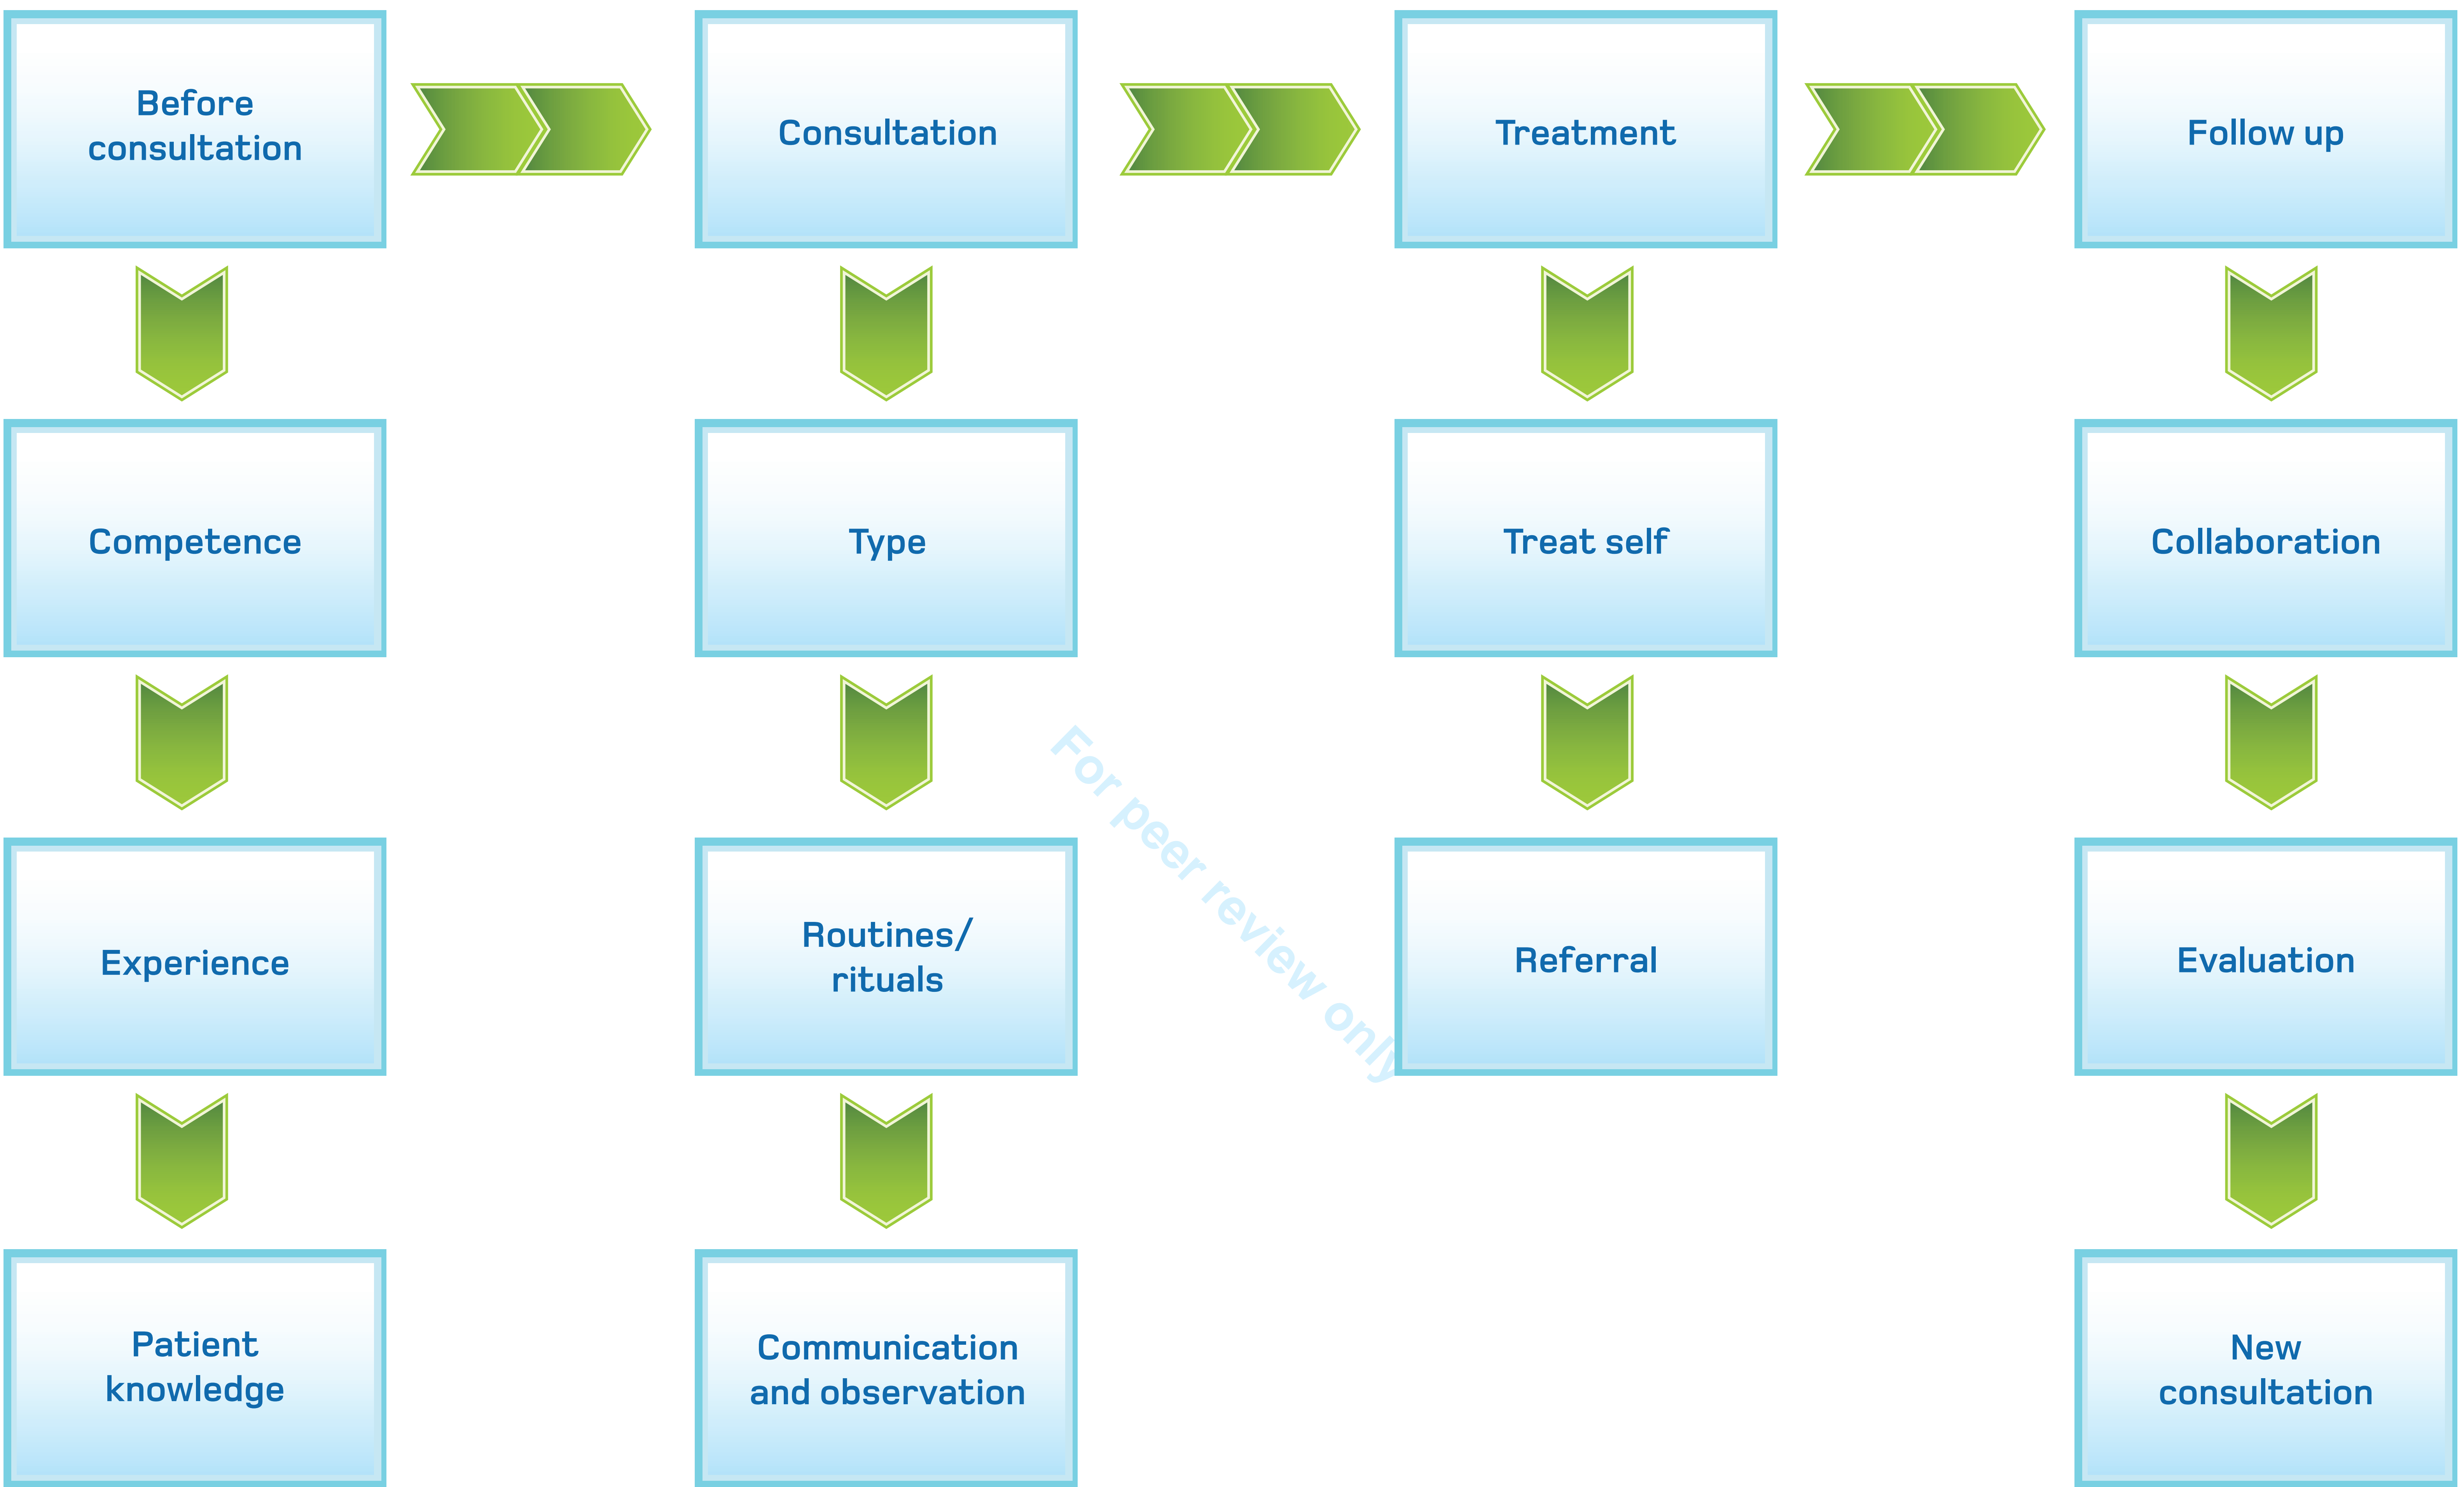

For peer review only - <http://bmjopen.bmj.com/site/about/guidelines.xhtml>



## Research check list - Fredheim et al. 2012

### **Domain 1: Research team and reflexivity**

#### **Personal characteristics**

1. Interviewer/facilitator 1: Terje Fredheim
  2. Credentials: MSc, Master of Learning in Complex Systems
  3. Occupation: PhD-student
  4. Gender: Male
  5. Experience and training: Educated in and have participated in earlier qualitative and quantitative research
- 
1. Interviewer/facilitator 2: Kari Kjøsberg
  2. Credentials: Reg. nurse, MMHC
  3. Occupation: Reg. nurse specialised in mental health care.
  4. Gender: Female
  5. Experience and training: educated in and have participated in different earlier qualitative health research studies.

#### **Relationship with participants**

6. Relationship established: There was no relationship prior to study commencement.
7. Participant knowledge of the interviewer: They were informed about researchers' professional background and interest in the project.
8. Interviewer characteristics: The interviewers' connection with specialised health care may be regarded as bias, but was considered as a minor problem. However the interviewers waited until the interview was over until they presented detailed information about prior experiences and information relevant for the topic.

### **Domain 2: Study design**

#### **Theoretical frame work**

9. Methodological orientation and theory: The study relies on a phenomenological approach with content analysis and systematic text condensation as the main method in analysing data.

#### **Participant selection**

10. Sampling: Names of possible participants were given the interviewers from a senior psychiatrist retired after decades in habilitation services. Our research group regarded this psychiatrist to be the best source to help us find the sample of participants we were looking for. The interviewers then recruited strategically from this list to represent different gender, age, diagnosis and location (rural or city).
11. Method of approach: Participants were first contacted by letter. Two or three days after likely retrieval of the letter, possible participants were contacted by telephone. Information was given and request made, and appointment made with those who were positive.
12. Sample size: Ten participants were interviewed.
13. Non-participation: Five persons refused/hesitated to participate. No drop-outs. The reason for non-participation was not asked for.

#### **Setting**

1  
2  
3 14. Setting of data collection: All interviews were conducted in the participants' office or  
4 nearby meeting room.

5 15. Presence of non-participants: None.

6 16. Description of sample: Seven males and three females were interviewed. They represented  
7 various age and location (city/rural).  
8  
9

### 10 11 12 **Data collection**

13 17. Interview guide: A guide with themes and main questions was provided by the researchers  
14 and discussed with the supervisors. Also a checklist was used to get more information on  
15 topics that seemed important or topics not mentioned by the participant. No pilot was tested.

16 18. Repeat interviews: Repeated interviews were not used. Participants were encouraged to  
17 contact the interviewers if they wanted to add something and one of them made contact by  
18 telephone to give some more information.

19 19. Audio/visual recording: Audio recording was used to collect data.

20 20. Field notes: The two interviewers made field notes during the interviews, and immediately  
21 after each interview.  
22

23 21. Duration: Interviews lasted 47 – 81 minutes.

24 22. Data saturation: Saturation and was discussed in the research group after the tenth  
25 interview had been conducted and was then regarded as satisfactory. We were open to the fact  
26 that new themes and important information could appear, but regarded the data material to  
27 contain breadth and depth for the topic investigated.

28 23. Transcripts returned: Transcripts were not returned to participants for comment or  
29 corrections.  
30  
31

### 32 **Domain 3. Analysis and findings**

#### 33 34 **Data analysis**

35 24. Number of data coders: All five in the research group read the complete transcript. One of  
36 the interviewers presented identified meaningful units and themes derivated from the material  
37 and they were discussed in the research group.

38 25. Description of the coding tree: The coding tree is illustrated with a figure of major and  
39 minor themes.

40 26. Derivation of themes: Themes emerged from the data.

41 27. Software: No additional software was used.

42 28. Participant checking: Participants were offered feedback on the findings. Five of them  
43 expressed a request for feedback when the material had been accepted for publication.  
44  
45

#### 46 **Reporting**

47 29. Quotations presented: Participant quotations were used to illustrate findings. Quotations  
48 are not identified in this paper due to a small number of participants.

49 30. Data and findings consistent: The themes developed by the researcher(s) were logically  
50 consistent and reflective of the data.  
51

52 31. Clarity of major themes: The major themes are described in the article, and reflect the  
53 research question.

54 32. Clarity of minor themes: Minor themes are described in the article, and reflect meaningful  
55 units. Diverse cases are described where necessary.  
56  
57  
58  
59  
60

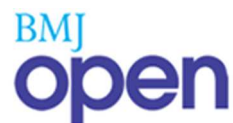

**Intellectual disability and mental health problems:  
a qualitative study of general practitioners' views**

|                                 |                                                                                                                                                                                                                                                                                                                                          |
|---------------------------------|------------------------------------------------------------------------------------------------------------------------------------------------------------------------------------------------------------------------------------------------------------------------------------------------------------------------------------------|
| Journal:                        | <i>BMJ Open</i>                                                                                                                                                                                                                                                                                                                          |
| Manuscript ID:                  | bmjopen-2012-002283.R1                                                                                                                                                                                                                                                                                                                   |
| Article Type:                   | Research                                                                                                                                                                                                                                                                                                                                 |
| Date Submitted by the Author:   | 16-Jan-2013                                                                                                                                                                                                                                                                                                                              |
| Complete List of Authors:       | Fredheim, Terje; Sykehuset Innlandet, Religionspsykologisk senter Haavet, Ole; University of Oslo, Department of General Practice Danbolt, Lars; Innlandet Hospital Trust, Psychology of religion Kjønsgberg, Kari; Innlandet Hospital Trust, Psychology of religion Lien, Lars; University College of Hedmark, Faculty of Public Health |
| <b>Primary Subject Heading</b>: | General practice / Family practice                                                                                                                                                                                                                                                                                                       |
| Secondary Subject Heading:      | Qualitative research, Mental health                                                                                                                                                                                                                                                                                                      |
| Keywords:                       | Intellectual disability, General practice, MENTAL HEALTH, Challenging behaviour, QUALITATIVE RESEARCH                                                                                                                                                                                                                                    |
|                                 |                                                                                                                                                                                                                                                                                                                                          |

SCHOLARONE™  
Manuscripts

1  
2  
3 **Intellectual disability and mental health problems:**  
4  
5  
6 **a qualitative study of general practitioners' views**  
7  
8  
9

10 Terje Fredheim<sup>1,4\*</sup>, Ole R Haavet<sup>4</sup> Lars J Danbolt<sup>1,3</sup>, Kari Kjøsberg<sup>1</sup>, Lars Lien<sup>1,2</sup>,  
11  
12

13  
14  
15 <sup>1</sup>Centre for Psychology of Religion, Innlandet Hospital Trust (SIHF), Hamar, Norway  
16

17 <sup>2</sup> Faculty of public health, University College of Hedmark, Elverum, Norway  
18

19 <sup>3</sup>Norwegian School of Theology, Oslo, Norway  
20

21 <sup>4</sup>Department of General Practice, University of Oslo, Oslo, Norway  
22  
23  
24

25  
26 \* Corresponding Author:  
27

28 Terje Fredheim, Religionspsykologisk Senter, Postboks 68, N-2312 Ottestad  
29

30 E-mail: [terje.fredheim@sykehuset-innlandet.no](mailto:terje.fredheim@sykehuset-innlandet.no)  
31  
32

33 Phone: 0047 - 41219155  
34  
35  
36  
37  
38  
39  
40  
41  
42  
43  
44  
45  
46  
47  
48  
49  
50  
51  
52  
53  
54  
55  
56  
57  
58  
59  
60

## Article summary

### Article focus

- The aim of this study was to investigate the general practitioners (GPs) experiences in handling people with intellectual disabilities and mental/behavioural problems (MBP) in order to identify factors related to high quality services, important areas for improvement and suggest fields for further exploration.

### Key messages

- This study shows that GPs have different opinions on central subjects in providing high quality services to people with ID and MBP.
- Even GPs with an assumed high competence and engagement in this patient group, lack evidence based knowledge and base their actions on experience based practice.
- GPs are concerned about the competence in specialist departments when it comes to treatment of MBP in people with ID

### Strengths and limitations in this study

- Participants were of both genders, from several localities and had a broad range of patients with ID and MBP.
- As far as we know, this is the only study that has addressed GPs experiences with people with ID and MBP.
- Although data across participants were found sufficient, a small group of participants were interviewed.

## Abstract

**Objectives** To investigate general practitioners' (GPs) experiences in managing people with intellectual disabilities (ID) and mental and behavioural problems (MBP).

**Design** Qualitative study using in-depth interviews.

**Setting** General practice in Hedmark County, Norway.

**Participants** 10 GPs were qualitatively interviewed about their professional experience regarding people with ID and MBP. Data were analysed by all authors using systematic text condensation.

**Results** The participants' knowledge was primarily experience based and collaboration with specialists seemed to be individual rather than systemic. The GPs provided different meanings for referral, treatment, collaboration, regular health checks and home visits.

**Conclusions** GPs are in a position to provide evidence-based and individual treatment for both psychological and somatic problems among people with ID. This potential is not yet fully exploited. The findings in this study provide useful information for further research in the field.

## Introduction

People with intellectual disabilities (ID) are particularly vulnerable to health problems and experience difficulties in meeting their health care needs.<sup>1-7</sup> Two recent attempts provide a focus to this challenge: a consensus manifesto by the European Association of Intellectual Disability Medicine<sup>8</sup> and an independent inquiry on a request from the British Secretary of State for Health.<sup>9</sup> These reports share the goal of improving health care services for people with ID, but the extent to which their recommendations have been implemented remains dubious. A guideline provides Canadian primary care professionals with practical recommendations based on evidence and current knowledge, to address the particular health needs of people with ID.<sup>10</sup> In Norway, an internet course from the Norwegian Medical Association, have since 2007 been available to expand the knowledge on patients with ID.

A recent meta-analysis has shown that the prevalence of ID is approximately 1%.<sup>11</sup> Prevalence of mental health problems among people with ID vary in different studies from 14% to 60% and can be difficult to identify and diagnose.<sup>12</sup> There is considerable overlap between mental health problems and challenging behaviour<sup>13,14</sup>; these two complications are often inseparable, suggesting that there is little to gain from distinguishing between them when trying to identify implications for health workers. To detect and treat people with ID and mental and behaviour problems (MBP) is a test of the competence of the general practitioner (GP). Doctors specialising in general practice acquire knowledge about the early and general presentation of diseases, and early treatment and follow-up of chronic disease. GPs play a central role because of their familiarity with other primary health care services, as gate-keepers to specialist health care and in evaluating treatment and cooperate with the patient, family and other service providers.<sup>15-18</sup>

1  
2  
3 Each Norwegian GP has 5 to 10 patients with ID on their list. Some of these patients  
4 will have MBP, which potentially influences their physical health, including poor diet; erratic  
5 compliance with medication; and behaviour that can affect physical health, creating the need  
6 for close care and structure in health services.<sup>19</sup> A qualitative study have identified areas of  
7 discomfort when it comes to proper educational training for GPs, to meet the health needs of  
8 people with ID.<sup>20</sup>

9  
10  
11  
12  
13  
14  
15  
16 The importance of closely monitored care and high-quality health services to meet the  
17 challenge of inequality in health services for people with ID have provided the focus for  
18 several papers.<sup>1,3,5,6,21</sup> There is however few studies that have looked at the way GPs are  
19 working with patients with ID and MBP. The aim of our research was to explore the  
20 experiences, attitudes and perceived role and competence of GPs providing health services to  
21 people with ID, with a special focus on people with ID and MBP.  
22  
23  
24  
25  
26  
27  
28  
29

## 30 **METHODS**

### 31 **A qualitative method**

32  
33  
34 We opted for a qualitative approach, in order to obtain more detailed descriptions of the GPs'  
35 experiences serving people with ID and MBP. In-depth interviews are suitable in inquiring  
36 about the GP's experiences, facilitating a deeper understanding of their opinions and  
37 attitudes.<sup>22,23</sup> We preferred open interviews to focus on each participant's descriptions and  
38 experiences, and bringing narratives into the method, by giving participants the opportunity to  
39 provide meaning to their responses.  
40  
41  
42  
43  
44  
45  
46  
47  
48  
49

### 50 **Participants**

51  
52 Data were drawn from a total of 10 interviews with 10 participating GPs aged 41 to 64 (table  
53  
54  
55  
56  
57  
58  
59  
60



1  
2  
3 psychiatrist with more than 30 years of experience with ID patients in collaboration with GPs  
4  
5 in Hedmark County. There are 173 GPs in Hedmark, and the senior psychiatrist considered 25  
6  
7 of them to have more than the usual level of experience with ID patients and a relatively large  
8  
9 number of ID patients on their list. A letter was sent to 15 of these GPs, purposefully selected  
10  
11 with regard to geographical location and gender. 10 GPs were able to participate, 3 GPs  
12  
13 refused to participate, and 2 GPs did not respond. Participation in this study was voluntary,  
14  
15 and each participant signed an informed consent form, and was informed of their right to  
16  
17 withdraw from the study at any time, without further explanation.  
18  
19

TABLE 1

| Participant number | Age | Gender | Location | Total number of patients | Approximate number of ID patients | Reported number. of ID patients with psychiatric/ behavioural challenge |
|--------------------|-----|--------|----------|--------------------------|-----------------------------------|-------------------------------------------------------------------------|
| 1                  | 58  | F      | Rural    | 950                      | 6                                 | 2                                                                       |
| 2                  | 61  | M      | City     | 1200                     | 3                                 | 2                                                                       |
| 3                  | 60  | M      | Rural    | 800                      | 14                                | 4                                                                       |
| 4                  | 64  | M      | City     | 2500                     | 20                                | 10                                                                      |
| 5                  | 60  | M      | Rural    | 750                      | 15                                | 6                                                                       |
| 6                  | 61  | M      | City     | 1000                     | 5                                 | ?                                                                       |
| 7                  | 60  | M      | City     | 1100                     | 30                                | 20                                                                      |
| 8                  | 42  | F      | Rural    | 850                      | 7                                 | 3                                                                       |
| 9                  | 59  | M      | Rural    | 1000                     | 12                                | 6                                                                       |
| 10                 | 41  | F      | Rural    | 1300                     | 10                                | 5                                                                       |

20  
21  
22  
23  
24  
25  
26  
27  
28  
29  
30  
31  
32  
33  
34  
35  
36  
37  
38  
39  
40  
41  
42  
43  
44 *Participants' number, age, gender, location, total number of patients, approximately number of patients with ID,*  
45 *and reported number of ID-patients with mental or behavioural problems*

## 46 47 48 49 50 **Setting**

51  
52 All 10 interviews were conducted in the GPs' offices, located in Hedmark county, an  
53  
54 agricultural county with small towns and a total population of approximately 190 000. The  
55  
56 interviews lasted 41–81 minutes, with a mean of 57 minutes. Interviews were conducted from  
57  
58  
59  
60

1  
2  
3 October to November 2011 and were audio recorded. All but one interview was conducted by  
4  
5 two of the authors (TF and KK), and there were no former relationship between the  
6  
7 participants and the interviewers. The interviews were planned, the participants were prepared  
8  
9 on the topic and had allocated time for the interview. The interview consisted of open-ended  
10  
11 questions based on an interview guide with two main questions:  
12

- 13  
14 1. What are your experiences with ID patients who have additional mental health problems  
15  
16 and/or challenging behaviour?  
17
- 18  
19 2. What do you think is the GP's role for these patients?  
20

21  
22 The additional checklist was used to gather information that was otherwise missing or  
23  
24 to provide greater depth or breadth to incomplete information. Follow-up questions were  
25  
26 taken from a list of keywords; number of patients in the GP's patient group, collaborative  
27  
28 partners, regular health checks, specific training on the topic, perceived knowledge,  
29  
30 knowledge of evidence based literature on the topic and attitude towards psychotropic  
31  
32 treatment of people with ID.  
33

## 34 35 **Analysis**

36  
37 The interviewers made field notes with the participants' frequently used words, phrases and  
38  
39 other statements requiring follow-up. Pauses, engagement, laughter and gestures were also  
40  
41 noted, and the field notes were used in addition to the total transcripts. The 10 interviews  
42  
43 generated approximately 119 pages of single-spaced text. Analysis of transcripts was  
44  
45 conducted using systematic text condensation.<sup>22,24,25</sup> The first author read the transcripts  
46  
47 several times to obtain a sense of the whole. The other authors independently read the  
48  
49 transcripts and identified meaningful units, themes and subthemes, trying to capture the  
50  
51 "essential expression". These findings were discussed among the authors.  
52  
53  
54  
55  
56  
57  
58  
59  
60

## RESULTS

During the interview, GPs described their experiences, consultations and collaboration with a variety of relatives and professionals. Case presentations included descriptions of ID patients with complex medical, psychiatric and behavioural challenges. GPs shared examples of what kind of challenges they were faced with, managing these patients. It could be a patient with Down syndrome, psychiatric illness and hard regulated diabetes. Other patients could be aggressive both verbally and physically and not willing to participate in tests in a typical consultation at the doctor's office. Some of the patients lived alone with little community services, and were having a lifestyle with several potential harmful traits, like heavily smoking, alcohol drinking or eating disorders, and limited cognitive resources to understand the consequences of their actions.

As a model of analysis, the process of a consultation emerged from the material as the best description of the GPs' experiences with this group of patients (figure 1). This model illustrates a GP's pathway through a consultation with four main categories: basis for decisions, consultation, treatment and follow-up.

-----  
Figure 1 approximately here  
-----

### **Basis for decisions**

The main category, *basis for decisions*, epitomizes the GP's knowledge and experience in the context of the patient group and describes their medical education, experiences, courses and relevant post-graduate education on this topic. The GPs described limited training in patients with ID from their medical school or post-graduate courses. On direct question, none of the GPs' had knowledge of The Medical Associations internet-based course on the topic.

1  
2  
3  
4  
5 *The Norwegian Medical Association arranges a lot of courses, but I have until today's*  
6  
7 *date never seen a course on this topic. (GP #6)*  
8  
9

10  
11  
12 When the GPs' were directly asked on what basis they treated these patients there was no  
13  
14 mention of articles, books or peer-reviewed journals on the topic:

15  
16  
17  
18 *I think... those medications that I am used to prescribing, and that I know are effective*  
19  
20 *in any or another way, I will use them as a common guideline. (GP #1)*  
21  
22

23  
24  
25 *I have common knowledge about patients and psychiatry. I have a large number of*  
26  
27 *patients and I have years of experience. (GP #4)*  
28  
29

30  
31  
32 *It might be revealing, but I use common sense and my own experiences. (GP #9)*  
33  
34

35  
36  
37 *I haven't read any literature on this theme, but I have learned some in collaborating*  
38  
39 *with Habilitation services. (GP #6)*  
40  
41

42  
43 Knowledge of the patients' background and continuity in the relationship between  
44  
45 patient and physician were seen as key issues in providing the best service. Furthermore these  
46  
47 GPs saw the advantage of being a family doctor, improving the relationship to the patients  
48  
49 allowing the GP to make a better job of evaluating the biological, psychological and social  
50  
51 strengths of the patients. As one participant said:  
52  
53  
54  
55  
56  
57  
58  
59  
60

1  
2  
3 *The family will be a support system for the patient anyway, so I see this as a great*  
4  
5 *advantage. (GP #6)*  
6  
7

8  
9  
10 *A patient of me, his sister and sister's child are my patients. His sister has been here,*  
11 *lying on the bench pregnant. He knows this, and we talk a little about it. It seems to*  
12 *make him more comfortable and familiar with the situation when he knows I am*  
13 *helping more of his family as well. I can measure his blood pressure and do blood*  
14 *samples, some thing he was not able to do at his former GP. (GP #1)*  
15  
16  
17  
18  
19

20  
21  
22  
23 A key finding in this category is that most of the treatment is founded on experience-  
24 based knowledge. The material was rich in descriptions of patient histories, organisational  
25 system changes and historical events in the ID health care service, together with private  
26 memories from childhood or random meetings with people with intellectual disability.  
27 Because experiences are individual, there were many different stories, opinions and points of  
28 view.  
29  
30  
31  
32  
33  
34  
35  
36  
37  
38  
39  
40  
41  
42  
43  
44  
45  
46  
47

48  
49  
50  
51 *Already in primary school I went to a school where people with ID were integrated.*  
52 *Having contact with people with ID has never been strange or unfamiliar for me. (GP*  
53 *#8)*  
54  
55  
56  
57  
58  
59  
60

## Consultation

The second main category, *consultation*, covers type of consultation, communication and individual routines or rituals by either the GP or the patient. First there are descriptions of various types of consultations which can occur in either the office or the patient's home: acute consultation, planned evaluations of treatment and prescriptions, and health checks. The GPs

1  
2  
3 varied in their opinions about the benefits and possibilities of seeing the patient at home, as  
4  
5 quotes from these two doctors illustrate:  
6  
7

8  
9  
10 *Home visits are soon to become a closed chapter in general practice, but with these*  
11 *patients I find it necessary to do home visits. Then I can see with my own eyes how*  
12 *things appear at home (GP #5).*  
13  
14

15  
16  
17  
18 *They need to be observed and... it is not always easy for a GP to be able to observe. A*  
19 *GP should stay in the office and be available for patients (GP #4).*  
20  
21  
22

23  
24  
25 Furthermore the GPs have different opinions about the benefits and possibilities of regular  
26 health checks for this patient group. Lack of standard guidelines opens the door for individual  
27 solutions and a variety of explanations. One participant highlighted this patient group as bad  
28 requesters of health care, requiring closer follow-up:  
29  
30  
31  
32

33  
34  
35  
36 *We may not be optimally good at this, but we try to do it once a year, and that is about*  
37 *were it ends. Some have a health problem that leads to more frequent consultations; in*  
38 *those cases a yearly health control is less important. But in general these are patients*  
39 *who don't tend to promote themselves. (GP #9)*  
40  
41  
42  
43  
44  
45  
46

47  
48 There were descriptions of patients who went through special routines and rituals in  
49 their GP's office. It seemed to be important for the relationship between the GP and the  
50 patient that these routines be followed; the patient tended to be calmer allowing the doctor to  
51 undertake the necessary investigations. As one participant said:  
52  
53  
54  
55  
56  
57  
58  
59  
60

1  
2  
3 *He is sitting here, takes a glass of water, sits down again and drinks some water.*

4  
5 *Sometimes I am able to check his blood pressure and do blood tests. He was not able*  
6  
7 *to do that with his previous GP (GP #1).*  
8  
9

10  
11  
12 Communication and observation is another cluster of experiences in this category. Some of  
13  
14 these patients are obviously anxious about a consultation, and all GPs said that their focus was  
15  
16 on the patient, communicating directly with the ID patients, even though they were  
17  
18 accompanied by others. If something could not be done because of unwillingness or  
19  
20 restlessness, they did not push the patient, but booked another appointment in the near future.  
21

22  
23 Our participants argued that their patients' should be accompanied by someone who  
24  
25 knows the patient, their medical history and the reason for the consultation. Yet patients with  
26  
27 communication problems were sometimes accompanied to the doctor's office by health  
28  
29 workers with limited knowledge of the patient. Because GPs must rely on information from  
30  
31 accompanying persons, they would sometimes send the patient home with a new appointment.  
32

33  
34 As one participant said:

35  
36  
37  
38 *It is essential that we have confidence in the information we are given. And that it is*  
39  
40 *not exaggerated, hyped or trivialized, but is a sober description that it is possible for*  
41  
42 *me as a GP to navigate towards (GP #7).*  
43  
44  
45  
46

47  
48 Some participants were more likely to use systematic consultations and follow-up,  
49  
50 especially if the patient had chronic somatic problems. Nevertheless, the somatic problem,  
51  
52 rather than the ID and MBP constituted the main reason for systematic and frequent  
53  
54 consultations.  
55  
56  
57  
58  
59  
60

## Treatment

This third main category covers the choice the GP must make in trying to solve the patient's medical or mental health problem: to treat the patient or refer to a specialist. The participants expressed insecurity about how to treat and what to do with these patients. They described types and possibilities when they wanted to treat the patient themselves following these justifications: i) lack of confidence that a specialist would do the best job with these patients or ii) they believed the referral would be refused by the specialists' health services. This participant illustrates the lack of confidence in specialist services, and trust in own competence:

*I have to call a random chief doctor at the local psychiatric institution, because that is what the habilitation services relies on... then I think I will do this better by myself.*

*(GP #5)*

There were descriptions of all types of treatment, including check for somatic reasons for restlessness, behaviour modification, environmental actions and medical treatment. When the participants' referred these patients to specialist health services for their MBP, it was mainly for diagnostic work or medication queries. It was more common for the GPs to mention the name of a specialist rather than a specialist department.

*If I wanted to refer a patient with these problems, NN was the person. (GP #3)*

*NN2, a psychiatrist with long experience, is easy to turn to, because he provides good answers to my questions. (GP #8)*



1  
2  
3 Some of the GPs interviewed had created a private system to ensure systematic  
4 follow-up: prescribing medication over the short term and developing exclusive lists with  
5 patient data and consultation frequency.  
6  
7  
8  
9

## 10 **Evaluation and continuing treatment**

11  
12 This fourth main category constitutes a cluster of descriptions covering collaboration,  
13 evaluation of treatment effects and routines for follow-up consultations. The participants  
14 reported their experiences with collaborative partners – particularly how they evaluated the  
15 effects of psychotropic medication.  
16  
17  
18  
19  
20

21  
22 A patient with ID and MBP nearly always involves one or more collaborative partners.  
23 Interdisciplinary meetings were described as useful if the GPs had the opportunity to  
24 participate. The GPs were not sure if they were invited to all meetings, but had the impression  
25 that their attendance and competence was wanted. There were descriptions of meetings with  
26 parents, community mental health workers, psychiatrists, psychologists and nursing home  
27 employees, but they differed in type, in the frequency of the GPs' attendance and in the  
28 priority they placed on them.  
29  
30  
31  
32  
33  
34  
35  
36  
37  
38  
39

40 *I try to attend every primary meeting with collaborative partners. (GP #9)*

41  
42  
43  
44 *I am not often called in to primary meetings. I am, in a few cases, where medical*  
45 *issues are central. (GP #7)*  
46  
47  
48  
49

50  
51 The GPs that attended usually found meetings with collaborators useful, despite the fact that  
52 most of these meetings dealt with issues far from the GPs' areas of expertise. Some described  
53 meetings in which specific parts were structured towards their attendance, and this was told to  
54 lowering the barriers of GP attendance. Even though the GPs met a group of several  
55  
56  
57  
58  
59  
60

1  
2  
3 collaborators facing the challenges of a patient, they felt alone in issues regarding medical  
4  
5 questions for patients with ID and MBP. The feeling of being left alone was mentioned by  
6  
7 several participants, but one participant was particularly clear about it:  
8  
9

10  
11  
12 *I feel really alone on this topic with these patients. I don't really know what to do. (GP*  
13  
14 *#10)*

15  
16  
17  
18 The participants admit facing challenges in evaluating the effects of psychotropic  
19  
20 medication. Some argued for systematic evaluation of and specific feedback on their patients'  
21  
22 behaviour by parents or health care workers, in order to assess the effect of medication:  
23  
24

25  
26  
27 *I need observations and detailed feedback. There's no point in continuing a treatment*  
28  
29 *if it isn't effective. Systematic feedback is the required way of working. (GP #7)*  
30  
31

32  
33  
34 Others wanted a standard feedback sheet:  
35  
36

37  
38  
39 *Then you can have a summary over a longer time perspective, rather than some*  
40  
41 *random reports. But I don't know where to get these schemes. (GP #10)*  
42  
43

44  
45 As schemes or more objective feedback forms were not often provided, the participants were  
46  
47 forced to rely upon normative assessments provided by accompanying health workers or  
48  
49 parents.  
50  
51

## DISCUSSION

### Summary of main findings

The results in this study highlight the complexity of providing GP services to people with ID and MBP. The GPs interviewed in this study were strategically selected and were expected to have above-average engagement and competence with this patient group. Evidence-based medicine requires a combination of clinical expertise, best available external evidence and individual patient needs and choices.<sup>26</sup> The competence of the participants in this study is generally experience-based on this topic and therefore characterised by individual opinions and ways of working. The participants described limited education on ID issues, and none could refer to any scientific article, book or report on this topic. Even though there has been a course directed to GPs on ID patients, with a subcategory on MBP, none of the participants had attended it. This study implies that GPs with more than usual level of experience and interest in patients with ID and MBP, mainly relies on experience based knowledge, and have limited knowledge of articles, guidelines, reports or books on this topic. The fact that challenges managing patients with ID and MBP nearly is taught in medical school and the only course available is an internet course may contribute to the understanding of limited evidence based knowledge among the participants. In addition, our results imply that this topic is rarely mentioned in scientific papers or on conferences and courses with GP participation.

### Strengths and limitations of the study

The participants in this study were strategically selected, thereby representing a relatively homogenous group. This situation creates an obvious threat to external validity, and may limit the generalisation of our results. Nevertheless the interviewees revealed diverse opinions and descriptions of their managing of ID patients with MBP, thereby strengthening our impression

1  
2  
3 that this is an important research topic, albeit rarely investigated or highlighted in national or  
4  
5 international settings. Everyone in our research group has read and analysed the transcripts  
6  
7 and independently noted meaningful units. The group comprises researchers and clinicians  
8  
9 from several areas, thereby limiting the threat of a subjective finding with idiosyncratic  
10  
11 perspectives and limited objective value. Our findings can be transferred to clinical situations  
12  
13 and can provide a good starting point for further research in the field.  
14  
15

### 16 17 **Comparison with existing literature**

18  
19  
20 There is no hard evidence for the necessity and efficacy of using psychotropic medication for  
21  
22 treating MBP in people with ID.<sup>27-30</sup> The fact that none of the GPs interviewed could mention  
23  
24 any scientific paper that addresses this problem supports the finding that this as an  
25  
26 experience-based field, in which doctors rely on general competence valid for people without  
27  
28 ID. This is a noteworthy result, especially given the assumption that 70% of psychotropic  
29  
30 medication to this patient group is prescribed by the GP alone, without collaboration with a  
31  
32 psychiatrist.<sup>31,32</sup> Furthermore the results are in line with findings from another qualitative  
33  
34 study that addressed the educational needs of family physicians of people with ID, pointing  
35  
36 out a need for modifications of their education.<sup>20</sup>  
37  
38  
39

### 40 41 **Implications for future research and clinical practice**

42  
43 The results demonstrate a major challenge to treatment of MBP in people with ID: None of  
44  
45 the participants was sure how to treat these patients themselves, yet they were unsure where to  
46  
47 refer their patients if they found the situation too complicated for primary health care  
48  
49 treatment alone. They tended to distrust specialist health services. In some areas of the county,  
50  
51 the GPs mentioned a local hospital psychiatrist, and other participants mentioned specific  
52  
53 persons with whom they could collaborate. All in all, these statements serve to underline the  
54  
55 importance of knowledge and information exchange between potential collaborative partners.  
56  
57  
58  
59  
60

1  
2  
3 Our study shows that GPs' managing of patients with ID and MBP is primarily based  
4 upon experience-based knowledge – as told explicitly and as demonstrated through individual  
5 descriptions of managing and treatment. The GPs' opinions about working with ID patients is  
6 based on their own experience with this patient group, and with their general competence  
7 related to patients without ID. Attention should be focused on the ways in which medical  
8 training and post-graduate education can fill the competence gap, to ensure that this field  
9 becomes evidence-based rather than merely experience-based. As a start, the clinical  
10 guidelines from Canada mention some issues regarding people with ID and MBP<sup>10</sup>, and  
11 should be marketed for GPs working with these patients.  
12  
13  
14  
15  
16  
17  
18  
19  
20  
21  
22  
23  
24  
25  
26  
27  
28  
29  
30  
31  
32  
33  
34  
35  
36  
37  
38  
39  
40  
41  
42  
43  
44  
45  
46  
47  
48  
49  
50  
51  
52  
53  
54  
55  
56  
57  
58  
59  
60

## Acknowledgements

The authors would like to thank the GPs for their participation. We gratefully acknowledge the fact that the research is funded by The Norwegian Medical Association, but the views expressed are those of the authors alone.

## Funding

This study was funded by the Norwegian Medical Association. The funding body had no involvement in the research process or in the writing of this article.

## Competing interests

All authors have completed the ICMJE uniform disclosure form at [www.icmje.org/coi\\_disclosure.pdf](http://www.icmje.org/coi_disclosure.pdf) (available on request from the corresponding author) and declare: no support from any organisation for the submitted work; no financial relationships with any organisations that might have an interest in the submitted work in the previous three years; and no other relationships or activities that could appear to have influenced the submitted work.

## Ethics approval

The Norwegian regional committee for medical research approved this study.

## Contributors

TF contributed to acquisition of data, transcription, analysing data, drafting and critical revision of the article and approval of the final version. ORH, LJD and LL contributed to the design of the study, analysing data, critical revision of the article and approval of the final version. KK participated in the interviews, analysing data, critical revision of the article and approval of the final version.

## Data sharing

No additional data available.

For peer review only

## Reference List

- 1 Balogh R, Ouellette-Kuntz H, Bourne L, Lunsky Y, Colantonio A. Organising health care services for persons with an intellectual disability. *Cochrane Database Syst Rev* 2008;(4):CD007492.
- 2 Baxter H, Lowe K, Houston H, Jones G, Felce D, Kerr M. Previously unidentified morbidity in patients with intellectual disability. *Br J Gen Pract* 2006 Feb;56(523):93-8.
- 3 Felce D, Baxter H, Lowe K, Dunstan F, Houston H, Jones G, et al. The impact of checking the health of adults with intellectual disabilities on primary care consultation rates, health promotion and contact with specialists. *Journal of Applied Research in Intellectual Disabilities* 2008;21:597-602.
- 4 Kwok H, Cheung PW. Co-morbidity of psychiatric disorder and medical illness in people with intellectual disabilities. *Curr Opin Psychiatry* 2007 Sep;20(5):443-9.
- 5 Straetmans JM, van Schrojenstein Lantman-de Valk HM, Schellevis FG, Dinant GJ. Health problems of people with intellectual disabilities: the impact for general practice. *Br J Gen Pract* 2007 Jan;57(534):64-6.
- 6 van Schrojenstein Lantman-de Valk HM, Walsh PN. Managing health problems in people with intellectual disabilities. *BMJ* 2008;337:a2507.



- 1  
2  
3 7 Wullink M, Veldhuijzen W, Lantman-de Valk HM, Metsemakers JF, Dinant GJ.  
4  
5 Doctor-patient communication with people with intellectual disability--a qualitative  
6  
7 study. *BMC Fam Pract* 2009;10:82.  
8  
9  
10  
11 8 Scholte FA. European Manifesto: basic standards of healthcare for people with  
12  
13 intellectual disabilities. *Salud Publica Mex* 2008;50 Suppl 2:s273-s276.  
14  
15  
16  
17  
18 9 Michael J. Healthcare for All: Report of the Independent Inquiry into Access to  
19  
20 Healthcare for People with Learning Disabilities. London: Aldridge Press; 2008.  
21  
22  
23  
24 10 Sullivan WF, Berg JM, Bradley E, Cheetham T, Denton R, Heng J, et al. Primary care  
25  
26 of adults with developmental disabilities: Canadian consensus guidelines. *Can Fam*  
27  
28 *Physician* 2011 May;57(5):541-68.  
29  
30  
31  
32  
33 11 Maulik PK, Mascarenhas MN, Mathers CD, Dua T, Saxena S. Prevalence of intellectual  
34  
35 disability: a meta-analysis of population-based studies. *Res Dev Disabil* 2011  
36  
37 Mar;32(2):419-36.  
38  
39  
40  
41 12 Kerker BD, Owens PL, Zigler E, Horwitz SM. Mental health disorders among  
42  
43 individuals with mental retardation: challenges to accurate prevalence estimates. *Public*  
44  
45 *Health Rep* 2004 Jul;119(4):409-17.  
46  
47  
48  
49  
50 13 Allen D. The relationship between challenging behaviour and mental ill-health in people  
51  
52 with intellectual disabilities: a review of current theories and evidence. *J Intellect*  
53  
54 *Disabil* 2008 Dec;12(4):267-94.  
55  
56  
57  
58  
59  
60

- 1  
2  
3 14 Holden B, Gitlesen JP. The relationship between psychiatric symptomatology and  
4 motivation of challenging behaviour: a preliminary study. *Res Dev Disabil* 2008  
5 Sep;29(5):408-13.  
6  
7  
8  
9  
10  
11 15 Berardi D, Bortolotti B, Menchetti M, Bombi A, Tarricone I. Models of collaboration  
12 between general practice and mental health services in Italy. *The European Journal of*  
13 *Psychiatry* 2007;21:79-84.  
14  
15  
16  
17  
18  
19  
20 16 Fredheim T, Danbolt LJ, Haavet OR, Kjongsberg K, Lien L. Collaboration between  
21 General Practitioners and mental health care professionals: a qualitative study. *Int J*  
22 *Ment Health Syst* 2011 May 23;5(1):13.  
23  
24  
25  
26  
27  
28  
29 17 Fredheim T, Lien L, Danbolt LJ, Kjongsberg K, Haavet OR. Experiences with general  
30 practitioners described by families of children with intellectual disabilities and  
31 challenging behaviour: a qualitative study. *BMJ Open* 2011;1(2):e000304.  
32  
33  
34  
35  
36  
37  
38 18 Younes N, Gasquet I, Gaudebout P, Chaillet MP, Kovess V, Falissard B, et al. General  
39 Practitioners' opinions on their practice in mental health and their collaboration with  
40 mental health professionals. *BMC Fam Pract* 2005 May 2;6(1):18.  
41  
42  
43  
44  
45  
46 19 Hassiotis A, Barron DA, Hall IS. Intellectual disability psychiatry: a practical handbook.  
47 Chichester, West Sussex, England; Wiley-Blackwell; 2009.  
48  
49  
50  
51  
52 20 Wilkinson J, Dreyfus D, Cerreto M, Bokhour B. "Sometimes I feel overwhelmed":  
53 educational needs of family physicians caring for people with intellectual disability.  
54 *Intellect Dev Disabil* 2012 Jun;50(3):243-50.  
55  
56  
57  
58  
59  
60

- 1  
2  
3 21 Neville BG. Mental health services for people with learning disabilities. Medical needs  
4 are important too. *BMJ* 2001 Feb 3;322(7281):302.  
5  
6  
7  
8  
9 22 Kvale S, Brinkmann S. Interviews: learning the craft of qualitative research  
10 interviewing. Los Angeles, Calif.: Sage; 2009.  
11  
12  
13  
14  
15 23 Malterud K. The art and science of clinical knowledge: evidence beyond measures and  
16 numbers. *Lancet* 2001 Aug 4;358(9279):397-400.  
17  
18  
19  
20  
21 24 Giorgi A. Phenomenology and psychological research: essays. Pittsburgh, Pa.:  
22 Duquesne University Press; 1985.  
23  
24  
25  
26  
27  
28 25 Giorgi A. The descriptive phenomenological method in psychology: a modified  
29 Husserlian approach. Pittsburgh: Duquesne university press; 2009.  
30  
31  
32  
33  
34 26 Sackett DL, Rosenberg WM, Gray JA, Haynes RB, Richardson WS. Evidence based  
35 medicine: what it is and what it isn't. *BMJ* 1996 Jan 13;312(7023):71-2.  
36  
37  
38  
39  
40 27 Brylewski J, Duggan L. Antipsychotic medication for challenging behaviour in people  
41 with learning disability. *Cochrane Database Syst Rev* 2004;(3):CD000377.  
42  
43  
44  
45  
46  
47 28 Deb S, Kwok H, Bertelli M, Salvador-Carulla L, Bradley E, Torr J, et al. International  
48 guide to prescribing psychotropic medication for the management of problem  
49 behaviours in adults with intellectual disabilities. *World Psychiatry* 2009 Oct;8(3):181-  
50  
51  
52  
53  
54 6.  
55  
56  
57  
58  
59  
60

- 1  
2  
3 29 Matson JL, Bamburg JW, Mayville EA, Pinkston J, Bielecki J, Kuhn D, et al.  
4  
5 Psychopharmacology and mental retardation: a 10 year review (1990-1999). *Res Dev*  
6  
7 *Disabil* 2000 Jul;21(4):263-96.  
8  
9  
10  
11 30 Tyrer P, Oliver-Africano PC, Ahmed Z, Bouras N, Cooray S, Deb S, et al. Risperidone,  
12  
13 haloperidol, and placebo in the treatment of aggressive challenging behaviour in patients  
14  
15 with intellectual disability: a randomised controlled trial. *Lancet* 2008 Jan  
16  
17 5;371(9606):57-63.  
18  
19  
20  
21  
22 31 Baasland G, Engedal K. [Use of psychotropic medication among individuals with  
23  
24 mental retardation]. *Tidsskr Nor Laegeforen* 2009 Sep 10;129(17):1751-3.  
25  
26  
27  
28  
29 32 Holden B, Gitlesen JP. Psychotropic medication in adults with mental retardation:  
30  
31 prevalence, and prescription practices. *Res Dev Disabil* 2004 Nov;25(6):509-21.  
32  
33  
34  
35  
36  
37  
38  
39  
40  
41  
42  
43  
44  
45  
46  
47  
48  
49  
50  
51  
52  
53  
54  
55  
56  
57  
58  
59  
60

1  
2  
3  
4  
5  
6  
7  
8  
9  
10  
11  
12  
13  
14  
15  
16  
17  
18  
19  
20  
21  
22  
23  
24  
25  
26  
27  
28  
29  
30  
31  
32  
33  
34  
35  
36  
37  
38  
39  
40  
41  
42  
43  
44  
45  
46  
47  
48  
49  
50  
51  
52  
53  
54  
55  
56  
57  
58  
59  
60

## Intellectual disability and mental health problems: a qualitative study of general practitioners' views

Terje Fredheim<sup>1,4\*</sup>, Ole R Haavet<sup>4</sup> Lars J Danbolt<sup>1,3</sup>, Kari Kjøsberg<sup>1</sup>, Lars Lien<sup>1,2</sup>,

<sup>1</sup>Centre for Psychology of Religion, Innlandet Hospital Trust (SIHF), Hamar, Norway

<sup>2</sup>[Faculty of public health, University College of Hedmark, Elverum](#), Norway

<sup>3</sup>Norwegian School of Theology, Oslo, Norway

<sup>4</sup>Department of General Practice, University of Oslo, Oslo, Norway

\* Corresponding Author:

Terje Fredheim, Religionspsykologisk Senter, Postboks 68, N-2312 Ottestad

E-mail: [terje.fredheim@sykehuset-innlandet.no](mailto:terje.fredheim@sykehuset-innlandet.no)

Phone: 0047 - 41219155

## Article summary

### Article focus

- The aim of this study was to investigate the general practitioners (GPs) experiences in handling people with intellectual disabilities and mental/behavioural problems (MBP) in order to identify factors related to high quality services, important areas for improvement and suggest fields for further exploration.

### Key messages

- This study shows that GPs have different opinions on central subjects in providing high quality services to people with ID and MBP.
- Even GPs with an assumed high competence and engagement in this patient group, lack evidence based knowledge and base their actions on experience based practice.
- GPs are concerned about the competence in specialist departments when it comes to treatment of MBP in people with ID

### Strengths and limitations in this study

- Participants were of both genders, from several localities and had a broad range of patients with ID and MBP.
- As far as we know, this is the only study that has addressed GPs experiences with people with ID and MBP.
- Although data across participants were found sufficient, a small group of participants were interviewed.

## Abstract

**Objectives** To investigate general practitioners' (GPs) experiences in [managing](#) people with intellectual disabilities (ID) and mental and behavioural problems (MBP).

**Design** Qualitative study using in-depth interviews.

**Setting** General practice in Hedmark County, Norway.

**Participants** 10 GPs were qualitatively interviewed about their professional experience regarding people with ID and MBP. Data were analysed by all authors using systematic text condensation.

**Results** The participants' knowledge was primarily experience based and collaboration with specialists seemed to be individual rather than systemic. The GPs provided different meanings for referral, treatment, collaboration, regular health checks and home visits.

**Conclusions** GPs are in a position to provide evidence-based and individual treatment for both psychological and somatic problems among people with ID. This potential is not yet fully exploited. The findings in this study provide useful information for further research in the field.

## Introduction

People with intellectual disabilities (ID) are particularly vulnerable to health problems and experience difficulties in meeting their health care needs.<sup>1-7</sup> Two recent attempts provide a focus to this challenge: a consensus manifesto by the European Association of Intellectual Disability Medicine<sup>8</sup> and an independent inquiry on a request from the British Secretary of State for Health.<sup>9</sup> These reports share the goal of improving health care services for people with ID, but the extent to which their recommendations have been implemented remains dubious. [A guideline provides Canadian primary care professionals with practical recommendations based on evidence and current knowledge, to address the particular health needs of people with ID.](#) <sup>10</sup> [In Norway, an internet course from the Norwegian Medical Association, have since 2007 been available to expand the knowledge on patients with ID.](#)

A recent meta-analysis has shown that the prevalence of ID is approximately 1%.<sup>11</sup> Prevalence of mental health problems among people with ID vary in different studies from 14% to 60% and can be difficult to identify and diagnose.<sup>12</sup> There is considerable overlap between mental health problems and challenging behaviour<sup>13,14</sup>; these two complications are often inseparable, suggesting that there is little to gain from distinguishing between them when trying to identify implications for health workers. To detect and treat people with ID and mental and behaviour problems (MBP) is a test of the competence of the general practitioner (GP). Doctors specialising in general practice acquire knowledge about the early and general presentation of diseases, and early treatment and follow-up of chronic disease. GPs play a central role because of their familiarity with other primary health care services, as gate-keepers to specialist health care and in evaluating treatment and cooperate with the patient, family and other service providers.<sup>15-18</sup>



1  
2  
3 Each Norwegian GP has 5 to 10 patients with ID on their list. Some of these patients  
4 will have MBP, which potentially influences their physical health, including poor diet; erratic  
5 compliance with medication; and behaviour that can affect physical health, creating the need  
6  
7  
8  
9 for close care and structure in health services.<sup>19</sup> A qualitative study have identified areas of  
10 discomfort when it comes to proper educational training for GPs, to meet the health needs of  
11 people with ID.<sup>20</sup>  
12  
13  
14  
15

16 The importance of closely monitored care and high-quality health services to meet the  
17 challenge of inequality in health services for people with ID have provided the focus for  
18 several papers.<sup>1,3,5,6,21</sup> There is however few studies that have looked at the way GPs are  
19 working with patients with ID and MBP. The aim of our research was to explore the  
20 experiences, attitudes and perceived role and competence of GPs providing health services to  
21 people with ID, with a special focus on people with ID and MBP.  
22  
23  
24  
25  
26  
27  
28  
29

## 30 **METHODS**

### 31 **A qualitative method**

32  
33  
34 We opted for a qualitative approach, in order to obtain more detailed descriptions of the GPs'  
35 experiences serving people with ID and MBP. In-depth interviews are suitable in inquiring  
36 about the GP's experiences, facilitating a deeper understanding of their opinions and  
37 attitudes.<sup>22,23</sup> We preferred open interviews to focus on each participant's descriptions and  
38 experiences, and bringing narratives into the method, by giving participants the opportunity to  
39 provide meaning to their responses.  
40  
41  
42  
43  
44  
45  
46  
47  
48  
49

### 50 **Participants**

51 Data were drawn from a total of 10 interviews with 10 participating GPs aged 41 to 64 (table  
52  
53  
54  
55  
56  
57  
58  
59  
60  
61  
62  
63  
64  
65  
66  
67  
68  
69  
70  
71  
72  
73  
74  
75  
76  
77  
78  
79  
80  
81  
82  
83  
84  
85  
86  
87  
88  
89  
90  
91  
92  
93  
94  
95  
96  
97  
98  
99  
100  
101  
102  
103  
104  
105  
106  
107  
108  
109  
110  
111  
112  
113  
114  
115  
116  
117  
118  
119  
120  
121  
122  
123  
124  
125  
126  
127  
128  
129  
130  
131  
132  
133  
134  
135  
136  
137  
138  
139  
140  
141  
142  
143  
144  
145  
146  
147  
148  
149  
150  
151  
152  
153  
154  
155  
156  
157  
158  
159  
160  
161  
162  
163  
164  
165  
166  
167  
168  
169  
170  
171  
172  
173  
174  
175  
176  
177  
178  
179  
180  
181  
182  
183  
184  
185  
186  
187  
188  
189  
190  
191  
192  
193  
194  
195  
196  
197  
198  
199  
200  
201  
202  
203  
204  
205  
206  
207  
208  
209  
210  
211  
212  
213  
214  
215  
216  
217  
218  
219  
220  
221  
222  
223  
224  
225  
226  
227  
228  
229  
230  
231  
232  
233  
234  
235  
236  
237  
238  
239  
240  
241  
242  
243  
244  
245  
246  
247  
248  
249  
250  
251  
252  
253  
254  
255  
256  
257  
258  
259  
260  
261  
262  
263  
264  
265  
266  
267  
268  
269  
270  
271  
272  
273  
274  
275  
276  
277  
278  
279  
280  
281  
282  
283  
284  
285  
286  
287  
288  
289  
290  
291  
292  
293  
294  
295  
296  
297  
298  
299  
300  
301  
302  
303  
304  
305  
306  
307  
308  
309  
310  
311  
312  
313  
314  
315  
316  
317  
318  
319  
320  
321  
322  
323  
324  
325  
326  
327  
328  
329  
330  
331  
332  
333  
334  
335  
336  
337  
338  
339  
340  
341  
342  
343  
344  
345  
346  
347  
348  
349  
350  
351  
352  
353  
354  
355  
356  
357  
358  
359  
360  
361  
362  
363  
364  
365  
366  
367  
368  
369  
370  
371  
372  
373  
374  
375  
376  
377  
378  
379  
380  
381  
382  
383  
384  
385  
386  
387  
388  
389  
390  
391  
392  
393  
394  
395  
396  
397  
398  
399  
400  
401  
402  
403  
404  
405  
406  
407  
408  
409  
410  
411  
412  
413  
414  
415  
416  
417  
418  
419  
420  
421  
422  
423  
424  
425  
426  
427  
428  
429  
430  
431  
432  
433  
434  
435  
436  
437  
438  
439  
440  
441  
442  
443  
444  
445  
446  
447  
448  
449  
450  
451  
452  
453  
454  
455  
456  
457  
458  
459  
460  
461  
462  
463  
464  
465  
466  
467  
468  
469  
470  
471  
472  
473  
474  
475  
476  
477  
478  
479  
480  
481  
482  
483  
484  
485  
486  
487  
488  
489  
490  
491  
492  
493  
494  
495  
496  
497  
498  
499  
500  
501  
502  
503  
504  
505  
506  
507  
508  
509  
510  
511  
512  
513  
514  
515  
516  
517  
518  
519  
520  
521  
522  
523  
524  
525  
526  
527  
528  
529  
530  
531  
532  
533  
534  
535  
536  
537  
538  
539  
540  
541  
542  
543  
544  
545  
546  
547  
548  
549  
550  
551  
552  
553  
554  
555  
556  
557  
558  
559  
560  
561  
562  
563  
564  
565  
566  
567  
568  
569  
570  
571  
572  
573  
574  
575  
576  
577  
578  
579  
580  
581  
582  
583  
584  
585  
586  
587  
588  
589  
590  
591  
592  
593  
594  
595  
596  
597  
598  
599  
600  
601  
602  
603  
604  
605  
606  
607  
608  
609  
610  
611  
612  
613  
614  
615  
616  
617  
618  
619  
620  
621  
622  
623  
624  
625  
626  
627  
628  
629  
630  
631  
632  
633  
634  
635  
636  
637  
638  
639  
640  
641  
642  
643  
644  
645  
646  
647  
648  
649  
650  
651  
652  
653  
654  
655  
656  
657  
658  
659  
660  
661  
662  
663  
664  
665  
666  
667  
668  
669  
670  
671  
672  
673  
674  
675  
676  
677  
678  
679  
680  
681  
682  
683  
684  
685  
686  
687  
688  
689  
690  
691  
692  
693  
694  
695  
696  
697  
698  
699  
700  
701  
702  
703  
704  
705  
706  
707  
708  
709  
710  
711  
712  
713  
714  
715  
716  
717  
718  
719  
720  
721  
722  
723  
724  
725  
726  
727  
728  
729  
730  
731  
732  
733  
734  
735  
736  
737  
738  
739  
740  
741  
742  
743  
744  
745  
746  
747  
748  
749  
750  
751  
752  
753  
754  
755  
756  
757  
758  
759  
760  
761  
762  
763  
764  
765  
766  
767  
768  
769  
770  
771  
772  
773  
774  
775  
776  
777  
778  
779  
780  
781  
782  
783  
784  
785  
786  
787  
788  
789  
790  
791  
792  
793  
794  
795  
796  
797  
798  
799  
800  
801  
802  
803  
804  
805  
806  
807  
808  
809  
810  
811  
812  
813  
814  
815  
816  
817  
818  
819  
820  
821  
822  
823  
824  
825  
826  
827  
828  
829  
830  
831  
832  
833  
834  
835  
836  
837  
838  
839  
840  
841  
842  
843  
844  
845  
846  
847  
848  
849  
850  
851  
852  
853  
854  
855  
856  
857  
858  
859  
860  
861  
862  
863  
864  
865  
866  
867  
868  
869  
870  
871  
872  
873  
874  
875  
876  
877  
878  
879  
880  
881  
882  
883  
884  
885  
886  
887  
888  
889  
890  
891  
892  
893  
894  
895  
896  
897  
898  
899  
900  
901  
902  
903  
904  
905  
906  
907  
908  
909  
910  
911  
912  
913  
914  
915  
916  
917  
918  
919  
920  
921  
922  
923  
924  
925  
926  
927  
928  
929  
930  
931  
932  
933  
934  
935  
936  
937  
938  
939  
940  
941  
942  
943  
944  
945  
946  
947  
948  
949  
950  
951  
952  
953  
954  
955  
956  
957  
958  
959  
960  
961  
962  
963  
964  
965  
966  
967  
968  
969  
970  
971  
972  
973  
974  
975  
976  
977  
978  
979  
980  
981  
982  
983  
984  
985  
986  
987  
988  
989  
990  
991  
992  
993  
994  
995  
996  
997  
998  
999  
1000

1  
2  
3 psychiatrist with more than 30 years of experience with ID patients in collaboration with GPs  
4  
5 in Hedmark County. There are 173 GPs in Hedmark, and the senior psychiatrist considered 25  
6  
7 of them to have more than the usual level of experience with ID patients and a relatively large  
8  
9 number of ID patients on their list. A letter was sent to 15 of these GPs, purposefully selected  
10  
11 with regard to geographical location and gender. 10 GPs were able to participate, 3 GPs  
12  
13 refused to participate, and 2 GPs did not respond. Participation in this study was voluntary,  
14  
15 and each participant signed an informed consent form, and was informed of their right to  
16  
17 withdraw from the study at any time, without further explanation.  
18  
19

TABLE 1

| Participant number | Age | Gender | Location | Total number of patients | Approximate number of ID patients | Reported number. of ID patients with psychiatric/ behavioural challenge |
|--------------------|-----|--------|----------|--------------------------|-----------------------------------|-------------------------------------------------------------------------|
| 1                  | 58  | F      | Rural    | 950                      | 6                                 | 2                                                                       |
| 2                  | 61  | M      | City     | 1200                     | 3                                 | 2                                                                       |
| 3                  | 60  | M      | Rural    | 800                      | 14                                | 4                                                                       |
| 4                  | 64  | M      | City     | 2500                     | 20                                | 10                                                                      |
| 5                  | 60  | M      | Rural    | 750                      | 15                                | 6                                                                       |
| 6                  | 61  | M      | City     | 1000                     | 5                                 | ?                                                                       |
| 7                  | 60  | M      | City     | 1100                     | 30                                | 20                                                                      |
| 8                  | 42  | F      | Rural    | 850                      | 7                                 | 3                                                                       |
| 9                  | 59  | M      | Rural    | 1000                     | 12                                | 6                                                                       |
| 10                 | 41  | F      | Rural    | 1300                     | 10                                | 5                                                                       |

*Participants' number, age, gender, location, total number of patients, approximately number of patients with ID, and reported number of ID-patients with mental or behavioural problems*

## Setting

All 10 interviews were conducted in the GPs' offices, [located in Hedmark county, an agricultural county with small towns and a total population of approximately 190 000. The interviews](#) lasted 41–81 minutes, with a mean of 57 minutes. Interviews were conducted from

1  
2  
3 October to November 2011 and were audio recorded. All but one interview was conducted by  
4  
5 two of the authors (TF and KK), and there were no former relationship between the  
6  
7 participants and the interviewers. The interviews were planned, the participants were prepared  
8  
9 on the topic and had allocated time for the interview. The interview consisted of open-ended  
10  
11 questions based on an interview guide with two main questions:

- 12  
13  
14 1. What are your experiences with ID patients who have additional mental health problems  
15  
16 and/or challenging behaviour?  
17  
18 2. What do you think is the GP's role for these patients?  
19

20  
21 The additional checklist was used to gather information that was otherwise missing or  
22  
23 to provide greater depth or breadth to incomplete information. Follow-up questions were  
24  
25 taken from a list of keywords: number of patients in the GP's patient group, collaborative  
26  
27 partners, regular health checks, specific training on the topic, perceived knowledge,  
28  
29 knowledge of evidence based literature on the topic and attitude towards psychotropic  
30  
31 treatment of people with ID.  
32  
33

## 34 35 Analysis

36  
37 The interviewers made field notes with the participants' frequently used words, phrases and  
38  
39 other statements requiring follow-up. Pauses, engagement, laughter and gestures were also  
40  
41 noted, and the field notes were used in addition to the total transcripts. The 10 interviews  
42  
43 generated approximately 119 pages of single-spaced text. Analysis of transcripts was  
44  
45 conducted using systematic text condensation.<sup>22,24,25</sup> The first author read the transcripts  
46  
47 several times to obtain a sense of the whole. The other authors independently read the  
48  
49 transcripts and identified meaningful units, themes and subthemes, trying to capture the  
50  
51 "essential expression". These findings were discussed among the authors.  
52  
53  
54  
55  
56  
57  
58  
59  
60

## RESULTS

During the interview, GPs described their experiences, consultations and collaboration with a variety of relatives and professionals. Case presentations included descriptions of ID patients with complex medical, psychiatric and behavioural challenges. GPs shared examples of what kind of challenges they were faced with, managing these patients. It could be a patient with Down syndrome, psychiatric illness and hard regulated diabetes. Other patients could be aggressive both verbally and physically and not willing to participate in tests in a typical consultation at the doctor's office. Some of the patients lived alone with little community services, and were having a lifestyle with several potential harmful traits, like heavily smoking, alcohol drinking or eating disorders, and limited cognitive resources to understand the consequences of their actions.

As a model of analysis, the process of a consultation emerged from the material as the best description of the GPs' experiences with this group of patients (figure 1). This model illustrates a GP's pathway through a consultation with four main categories: basis for decisions, consultation, treatment and follow-up.

-----  
Figure 1 approximately here  
-----

### Basis for decisions

The main category, *basis for decisions*, epitomizes the GP's knowledge and experience in the context of the patient group and describes their medical education, experiences, courses and relevant post-graduate education on this topic. The GPs described limited training in patients with ID from their medical school or post-graduate courses. On direct question, none of the GPs' had knowledge of [The Medical Associations](#) internet-based course on the topic.

1  
2  
3  
4  
5 *The Norwegian Medical Association arranges a lot of courses, but I have until today's*  
6  
7 *date never seen a course on this topic. (GP #6)*  
8  
9

10  
11 *When the GPs' were directly asked on what basis they treated these patients* there was no  
12  
13 mention of articles, books or peer-reviewed journals on the topic:  
14  
15

16  
17  
18 *I think... those medications that I am used to prescribing, and that I know are effective*  
19  
20 *in any or another way, I will use them as a common guideline. (GP #1)*  
21  
22

23  
24  
25 *I have common knowledge about patients and psychiatry. I have a large number of*  
26  
27 *patients and I have years of experience. (GP #4)*  
28  
29

30  
31  
32 *It might be revealing, but I use common sense and my own experiences. (GP #9)*  
33  
34

35  
36 *I haven't read any literature on this theme, but I have learned some in collaborating*  
37  
38 *with Habilitation services. (GP #6)*  
39  
40

41  
42  
43 Knowledge of the patients' background and continuity in the relationship between  
44  
45 patient and physician were seen as key issues in providing the best service. Furthermore these  
46  
47 GPs saw the advantage of being a family doctor, improving the relationship to the patients  
48  
49 allowing the GP to make a better job of evaluating the biological, psychological and social  
50  
51 strengths of the patients. As one participant said:  
52  
53  
54  
55  
56  
57  
58  
59  
60

1  
2  
3 *The family will be a support system for the patient anyway, so I see this as a great*  
4  
5 *advantage. (GP #6)*  
6  
7

8  
9  
10 *A patient of me, his sister and sister's child are my patients. His sister has been here,*  
11 *lying on the bench pregnant. He knows this, and we talk a little about it. It seems to*  
12 *make him more comfortable and familiar with the situation when he knows I am*  
13 *helping more of his family as well. I can measure his blood pressure and do blood*  
14 *samples, some thing he was not able to do at his former GP. (GP #1)*  
15  
16  
17  
18  
19

20  
21  
22  
23 A key finding in this category is that most of the treatment is founded on experience-  
24 based knowledge. The material was rich in descriptions of patient histories, organisational  
25 system changes and historical events in the ID health care service, together with private  
26 memories from childhood or random meetings with people with intellectual disability.  
27 Because experiences are individual, there were many different stories, opinions and points of  
28 view.  
29  
30  
31  
32  
33  
34  
35  
36  
37  
38  
39  
40  
41  
42  
43  
44  
45  
46  
47

48 *Already in primary school I went to a school where people with ID were integrated.*  
49 *Having contact with people with ID has never been strange or unfamiliar for me. (GP*  
50 *#8)*  
51  
52  
53  
54  
55  
56  
57  
58  
59  
60

## Consultation

The second main category, *consultation*, covers type of consultation, communication and individual routines or rituals by either the GP or the patient. First there are descriptions of various types of consultations which can occur in either the office or the patient's home: acute consultation, planned evaluations of treatment and prescriptions, and health checks. The GPs

1  
2  
3 varied in their opinions about the benefits and possibilities of seeing the patient at home, as  
4  
5 quotes from these two doctors illustrate:  
6  
7

8  
9  
10 *Home visits are soon to become a closed chapter in general practice, but with these*  
11 *patients I find it necessary to do home visits. Then I can see with my own eyes how*  
12 *things appear at home (GP #5).*  
13  
14

15  
16  
17  
18 *They need to be observed and... it is not always easy for a GP to be able to observe. A*  
19 *GP should stay in the office and be available for patients (GP #4).*  
20  
21

22  
23  
24  
25 Furthermore the GPs have different opinions about the benefits and possibilities of regular  
26  
27 health checks for this patient group. Lack of standard guidelines opens the door for individual  
28  
29 solutions and a variety of explanations. One participant highlighted this patient group as bad  
30  
31 requesters of health care, requiring closer follow-up:  
32  
33

34  
35  
36 *We may not be optimally good at this, but we try to do it once a year, and that is about*  
37 *were it ends. Some have a health problem that leads to more frequent consultations; in*  
38 *those cases a yearly health control is less important. But in general these are patients*  
39 *who don't tend to promote themselves. (GP #9)*  
40  
41  
42  
43  
44  
45  
46

47  
48 There were descriptions of patients who went through special routines and rituals in  
49  
50 their GP's office. It seemed to be important for the relationship between the GP and the  
51  
52 patient that these routines be followed; the patient tended to be calmer allowing the doctor to  
53  
54 undertake the necessary investigations. As one participant said:  
55  
56  
57  
58  
59  
60

1  
2  
3 *He is sitting here, takes a glass of water, sits down again and drinks some water.*

4  
5 *Sometimes I am able to check his blood pressure and do blood tests. He was not able*  
6  
7 *to do that with his previous GP (GP #1).*  
8  
9

10  
11  
12 Communication and observation is another cluster of experiences in this category. Some of  
13  
14 these patients are obviously anxious about a consultation, and all GPs said that their focus was  
15  
16 on the patient, communicating directly with the ID patients, even though they were  
17  
18 accompanied by others. If something could not be done because of unwillingness or  
19  
20 restlessness, they did not push the patient, but booked another appointment in the near future.  
21

22  
23 Our participants argued that their patients' should be accompanied by someone who  
24  
25 knows the patient, their medical history and the reason for the consultation. Yet patients with  
26  
27 communication problems were sometimes accompanied to the doctor's office by health  
28  
29 workers with limited knowledge of the patient. Because GPs must rely on information from  
30  
31 accompanying persons, they would sometimes send the patient home with a new appointment.  
32

33  
34 As one participant said:  
35  
36

37  
38 *It is essential that we have confidence in the information we are given. And that it is*  
39  
40 *not exaggerated, hyped or trivialized, but is a sober description that it is possible for*  
41  
42 *me as a GP to navigate towards (GP #7).*  
43  
44  
45  
46

47  
48 Some participants were more likely to use systematic consultations and follow-up,  
49  
50 especially if the patient had chronic somatic problems. Nevertheless, the somatic problem,  
51  
52 rather than the ID and MBP constituted the main reason for systematic and frequent  
53  
54 consultations.  
55  
56  
57  
58  
59  
60



## Treatment

This third main category covers the choice the GP must make in trying to solve the patient's medical or mental health problem: to treat the patient or refer to a specialist. The participants expressed insecurity about how to treat and what to do with these patients. They described types and possibilities when they wanted to treat the patient themselves following these justifications: i) lack of confidence that a specialist would do the best job with these patients or ii) they believed the referral would be refused by the specialists' health services. This participant illustrates the lack of confidence in specialist services, and trust in own competence:

*I have to call a random chief doctor at the local psychiatric institution, because that is what the habilitation services relies on... then I think I will do this better by myself.*

*(GP #5)*

There were descriptions of all types of treatment, including check for somatic reasons for restlessness, behaviour modification, environmental actions and medical treatment. When the participants' referred these patients to specialist health services for their MBP, it was mainly for diagnostic work or medication queries. It was more common for the GPs to mention the name of a specialist rather than a specialist department.

*If I wanted to refer a patient with these problems, NN was the person. (GP #3)*

*NN2, a psychiatrist with long experience, is easy to turn to, because he provides good answers to my questions. (GP #8)*

1  
2  
3 Some of the GPs interviewed had created a private system to ensure systematic  
4 follow-up: prescribing medication over the short term and developing exclusive lists with  
5 patient data and consultation frequency.  
6  
7  
8  
9

## 10 **Evaluation and continuing treatment**

11  
12 This fourth main category constitutes a cluster of descriptions covering collaboration,  
13 evaluation of treatment effects and routines for follow-up consultations. The participants  
14 reported their experiences with collaborative partners – particularly how they evaluated the  
15 effects of psychotropic medication.  
16  
17  
18  
19  
20

21  
22 A patient with ID and MBP nearly always involves one or more collaborative partners.  
23  
24 Interdisciplinary meetings were described as useful if the GPs had the opportunity to  
25 participate. The GPs were not sure if they were invited to all meetings, but had the impression  
26 that their attendance and competence was wanted. There were descriptions of meetings with  
27 parents, community mental health workers, psychiatrists, psychologists and nursing home  
28 employees, but they differed in type, in the frequency of the GPs' attendance and in the  
29 priority they placed on them.  
30  
31  
32  
33  
34  
35  
36  
37  
38  
39

40 *I try to attend every primary meeting with collaborative partners. (GP #9)*

41  
42  
43  
44 *I am not often called in to primary meetings. I am, in a few cases, where medical*  
45 *issues are central. (GP #7)*  
46  
47  
48  
49  
50

51 The GPs that attended usually found meetings with collaborators useful, despite the fact that  
52 most of these meetings dealt with issues far from the GPs' areas of expertise. Some described  
53 meetings in which specific parts were structured towards their attendance, and this was told to  
54 lowering the barriers of GP attendance. Even though the GPs met a group of several  
55  
56  
57  
58  
59  
60

1  
2  
3 collaborators facing the challenges of a patient, they felt alone in issues regarding medical  
4 questions for patients with ID and MBP. The feeling of being left alone was mentioned by  
5  
6  
7 several participants, but one participant was particularly clear about it:  
8  
9

10  
11 *I feel really alone on this topic with these patients. I don't really know what to do. (GP*  
12 *#10)*  
13

14  
15  
16  
17  
18 The participants admit facing challenges in evaluating the effects of psychotropic  
19 medication. Some argued for systematic evaluation of and specific feedback on their patients'  
20 behaviour by parents or health care workers, in order to assess the effect of medication:  
21  
22  
23  
24

25  
26  
27 *I need observations and detailed feedback. There's no point in continuing a treatment*  
28 *if it isn't effective. Systematic feedback is the required way of working. (GP #7)*  
29  
30  
31

32  
33  
34 Others wanted a standard feedback sheet:  
35  
36  
37

38 *Then you can have a summary over a longer time perspective, rather than some*  
39 *random reports. But I don't know where to get these schemes. (GP #10)*  
40  
41  
42

43  
44  
45 As schemes or more objective feedback forms were not often provided, the participants were  
46 forced to rely upon normative assessments provided by accompanying health workers or  
47  
48  
49  
50  
51  
52  
53  
54  
55  
56  
57  
58  
59  
60

## DISCUSSION

### Summary of main findings

The results in this study highlight the complexity of providing GP services to people with ID and MBP. The GPs interviewed in this study were strategically selected and were expected to have above-average engagement and competence with this patient group. Evidence-based medicine requires a combination of clinical expertise, best available external evidence and individual patient needs and choices.<sup>26</sup> The competence of the participants in this study is generally experience-based on this topic and therefore characterised by individual opinions and ways of working. The participants described limited education on ID issues, and none could refer to any scientific article, book or report on this topic. Even though there has been a course directed to GPs on ID patients, with a subcategory on MBP, none of the participants had attended it. This study implies that GPs with more than usual level of experience and interest in patients with ID and MBP, mainly relies on experience based knowledge, and have limited knowledge of articles, guidelines, reports or books on this topic. The fact that challenges managing patients with ID and MBP nearly is taught in medical school and the only course available is an internet course may contribute to the understanding of limited evidence based knowledge among the participants. In addition, our results imply that this topic is rarely mentioned in scientific papers or on conferences and courses with GP participation.

### Strengths and limitations of the study

The participants in this study were strategically selected, thereby representing a relatively homogenous group. This situation creates an obvious threat to external validity, and may limit the generalisation of our results. Nevertheless the interviewees revealed diverse opinions and descriptions of their managing of ID patients with MBP, thereby strengthening our impression

1  
2  
3 that this is an important research topic, albeit rarely investigated or highlighted in national or  
4  
5 international settings. Everyone in our research group has read and analysed the transcripts  
6  
7 and independently noted meaningful units. The group comprises researchers and clinicians  
8  
9 from several areas, thereby limiting the threat of a subjective finding with idiosyncratic  
10  
11 perspectives and limited objective value. Our findings can be transferred to clinical situations  
12  
13 and can provide a good starting point for further research in the field.  
14  
15

### 16 17 **Comparison with existing literature**

18  
19 There is no hard evidence for the necessity and efficacy of using psychotropic medication for  
20  
21 treating MBP in people with ID.<sup>27-30</sup> The fact that none of the GPs interviewed could mention  
22  
23 any scientific paper that addresses this problem supports the finding that this as an  
24  
25 experience-based field, in which doctors rely on general competence valid for people without  
26  
27 ID. This is a noteworthy result, especially given the assumption that 70% of psychotropic  
28  
29 medication to this patient group is prescribed by the GP alone, without collaboration with a  
30  
31 psychiatrist.<sup>31,32</sup> Furthermore the results are in line with findings from another qualitative  
32  
33 study that addressed the educational needs of family physicians of people with ID, pointing  
34  
35 out a need for modifications of their education.<sup>20</sup>  
36  
37  
38  
39  
40

### 41 **Implications for future research and clinical practice**

42  
43 The results demonstrate a major challenge to treatment of MBP in people with ID: None of  
44  
45 the participants was sure how to treat these patients themselves, yet they were unsure where to  
46  
47 refer their patients if they found the situation too complicated for primary health care  
48  
49 treatment alone. They tended to distrust specialist health services. In some areas of the county,  
50  
51 the GPs mentioned a local hospital psychiatrist, and other participants mentioned specific  
52  
53 persons with whom they could collaborate. All in all, these statements serve to underline the  
54  
55 importance of knowledge and information exchange between potential collaborative partners.  
56  
57  
58  
59  
60

1  
2  
3 Our study shows that GPs' managing of patients with ID and MBP is primarily based  
4 upon experience-based knowledge – as told explicitly and as demonstrated through individual  
5 descriptions of managing and treatment. The GPs' opinions about working with ID patients is  
6  
7  
8 based on their own experience with this patient group, and with their general competence  
9 related to patients without ID. Attention should be focused on the ways in which medical  
10 training and post-graduate education can fill the competence gap, to ensure that this field  
11 becomes evidence-based rather than merely experience-based. As a start, the clinical  
12 guidelines from Canada mention some issues regarding people with ID and MBP<sup>10</sup>, and  
13 should be marketed for GPs working with these patients.  
14  
15  
16  
17  
18  
19  
20  
21  
22  
23  
24  
25  
26  
27  
28  
29  
30  
31  
32  
33  
34  
35  
36  
37  
38  
39  
40  
41  
42  
43  
44  
45  
46  
47  
48  
49  
50  
51  
52  
53  
54  
55  
56  
57  
58  
59  
60

## Acknowledgements

The authors would like to thank the GPs for their participation. We gratefully acknowledge the fact that the research is funded by The Norwegian Medical Association, but the views expressed are those of the authors alone.

## Funding

This study was funded by the Norwegian Medical Association. The funding body had no involvement in the research process or in the writing of this article.

## Competing interests

All authors have completed the ICMJE uniform disclosure form at [www.icmje.org/coi\\_disclosure.pdf](http://www.icmje.org/coi_disclosure.pdf) (available on request from the corresponding author) and declare: no support from any organisation for the submitted work; no financial relationships with any organisations that might have an interest in the submitted work in the previous three years; and no other relationships or activities that could appear to have influenced the submitted work.

## Ethics approval

The Norwegian regional committee for medical research approved this study.

## Contributors

TF contributed to acquisition of data, transcription, analysing data, drafting and critical revision of the article and approval of the final version. ORH, LJD and LL contributed to the design of the study, analysing data, critical revision of the article and approval of the final version. KK participated in the interviews, analysing data, critical revision of the article and approval of the final version.

1  
2  
3  
4  
5  
6  
7  
8  
9  
10  
11  
12  
13  
14  
15  
16  
17  
18  
19  
20  
21  
22  
23  
24  
25  
26  
27  
28  
29  
30  
31  
32  
33  
34  
35  
36  
37  
38  
39  
40  
41  
42  
43  
44  
45  
46  
47  
48  
49  
50  
51  
52  
53  
54  
55  
56  
57  
58  
59  
60

**Data sharing**

No additional data available.

For peer review only



## Reference List

- 1 Balogh R, Ouellette-Kuntz H, Bourne L, Lunsky Y, Colantonio A. Organising health care services for persons with an intellectual disability. *Cochrane Database Syst Rev* 2008;(4):CD007492.
- 2 Baxter H, Lowe K, Houston H, Jones G, Felce D, Kerr M. Previously unidentified morbidity in patients with intellectual disability. *Br J Gen Pract* 2006 Feb;56(523):93-8.
- 3 Felce D, Baxter H, Lowe K, Dunstan F, Houston H, Jones G, et al. The impact of checking the health of adults with intellectual disabilities on primary care consultation rates, health promotion and contact with specialists. *Journal of Applied Research in Intellectual Disabilities* 2008;21:597-602.
- 4 Kwok H, Cheung PW. Co-morbidity of psychiatric disorder and medical illness in people with intellectual disabilities. *Curr Opin Psychiatry* 2007 Sep;20(5):443-9.
- 5 Straetmans JM, van Schrojenstein Lantman-de Valk HM, Schellevis FG, Dinant GJ. Health problems of people with intellectual disabilities: the impact for general practice. *Br J Gen Pract* 2007 Jan;57(534):64-6.
- 6 van Schrojenstein Lantman-de Valk HM, Walsh PN. Managing health problems in people with intellectual disabilities. *BMJ* 2008;337:a2507.

- 1  
2  
3 7 Wullink M, Veldhuijzen W, Lantman-de Valk HM, Metsemakers JF, Dinant GJ.  
4  
5 Doctor-patient communication with people with intellectual disability--a qualitative  
6  
7 study. *BMC Fam Pract* 2009;10:82.  
8  
9  
10  
11 8 Scholte FA. European Manifesto: basic standards of healthcare for people with  
12  
13 intellectual disabilities. *Salud Publica Mex* 2008;50 Suppl 2:s273-s276.  
14  
15  
16  
17  
18 9 Michael J. Healthcare for All: Report of the Independent Inquiry into Access to  
19  
20 Healthcare for People with Learning Disabilities. London: Aldridge Press; 2008.  
21  
22  
23  
24 10 Sullivan WF, Berg JM, Bradley E, Cheetham T, Denton R, Heng J, et al. Primary care  
25  
26 of adults with developmental disabilities: Canadian consensus guidelines. *Can Fam*  
27  
28 *Physician* 2011 May;57(5):541-68.  
29  
30  
31  
32  
33 11 Maulik PK, Mascarenhas MN, Mathers CD, Dua T, Saxena S. Prevalence of intellectual  
34  
35 disability: a meta-analysis of population-based studies. *Res Dev Disabil* 2011  
36  
37 Mar;32(2):419-36.  
38  
39  
40  
41 12 Kerker BD, Owens PL, Zigler E, Horwitz SM. Mental health disorders among  
42  
43 individuals with mental retardation: challenges to accurate prevalence estimates. *Public*  
44  
45 *Health Rep* 2004 Jul;119(4):409-17.  
46  
47  
48  
49  
50 13 Allen D. The relationship between challenging behaviour and mental ill-health in people  
51  
52 with intellectual disabilities: a review of current theories and evidence. *J Intellect*  
53  
54 *Disabil* 2008 Dec;12(4):267-94.  
55  
56  
57  
58  
59  
60

- 1  
2  
3 14 Holden B, Gitlesen JP. The relationship between psychiatric symptomatology and  
4 motivation of challenging behaviour: a preliminary study. *Res Dev Disabil* 2008  
5 Sep;29(5):408-13.  
6  
7  
8  
9  
10  
11 15 Berardi D, Bortolotti B, Menchetti M, Bombi A, Tarricone I. Models of collaboration  
12 between general practice and mental health services in Italy. *The European Journal of*  
13 *Psychiatry* 2007;21:79-84.  
14  
15  
16  
17  
18  
19  
20 16 Fredheim T, Danbolt LJ, Haavet OR, Kjongsberg K, Lien L. Collaboration between  
21 General Practitioners and mental health care professionals: a qualitative study. *Int J*  
22 *Ment Health Syst* 2011 May 23;5(1):13.  
23  
24  
25  
26  
27  
28  
29 17 Fredheim T, Lien L, Danbolt LJ, Kjongsberg K, Haavet OR. Experiences with general  
30 practitioners described by families of children with intellectual disabilities and  
31 challenging behaviour: a qualitative study. *BMJ Open* 2011;1(2):e000304.  
32  
33  
34  
35  
36  
37  
38 18 Younes N, Gasquet I, Gaudebout P, Chaillet MP, Kovess V, Falissard B, et al. General  
39 Practitioners' opinions on their practice in mental health and their collaboration with  
40 mental health professionals. *BMC Fam Pract* 2005 May 2;6(1):18.  
41  
42  
43  
44  
45  
46 19 Hassiotis A, Barron DA, Hall IS. Intellectual disability psychiatry: a practical handbook.  
47 Chichester, West Sussex, England; Wiley-Blackwell; 2009.  
48  
49  
50  
51  
52 20 Wilkinson J, Dreyfus D, Cerreto M, Bokhour B. "Sometimes I feel overwhelmed":  
53 educational needs of family physicians caring for people with intellectual disability.  
54  
55  
56  
57  
58  
59  
60

- 1  
2  
3 21 Neville BG. Mental health services for people with learning disabilities. Medical needs  
4 are important too. *BMJ* 2001 Feb 3;322(7281):302.  
5  
6  
7  
8  
9 22 Kvale S, Brinkmann S. Interviews: learning the craft of qualitative research  
10 interviewing. Los Angeles, Calif.: Sage; 2009.  
11  
12  
13  
14  
15 23 Malterud K. The art and science of clinical knowledge: evidence beyond measures and  
16 numbers. *Lancet* 2001 Aug 4;358(9279):397-400.  
17  
18  
19  
20  
21 24 Giorgi A. Phenomenology and psychological research: essays. Pittsburgh, Pa.:  
22 Duquesne University Press; 1985.  
23  
24  
25  
26  
27  
28 25 Giorgi A. The descriptive phenomenological method in psychology: a modified  
29 Husserlian approach. Pittsburgh: Duquesne university press; 2009.  
30  
31  
32  
33  
34 26 Sackett DL, Rosenberg WM, Gray JA, Haynes RB, Richardson WS. Evidence based  
35 medicine: what it is and what it isn't. *BMJ* 1996 Jan 13;312(7023):71-2.  
36  
37  
38  
39  
40 27 Brylewski J, Duggan L. Antipsychotic medication for challenging behaviour in people  
41 with learning disability. *Cochrane Database Syst Rev* 2004;(3):CD000377.  
42  
43  
44  
45  
46 28 Deb S, Kwok H, Bertelli M, Salvador-Carulla L, Bradley E, Torr J, et al. International  
47 guide to prescribing psychotropic medication for the management of problem  
48 behaviours in adults with intellectual disabilities. *World Psychiatry* 2009 Oct;8(3):181-  
49  
50  
51  
52  
53  
54  
55  
56  
57  
58  
59  
60

- 1  
2  
3 29 Matson JL, Bamburg JW, Mayville EA, Pinkston J, Bielecki J, Kuhn D, et al.  
4  
5 Psychopharmacology and mental retardation: a 10 year review (1990-1999). *Res Dev*  
6  
7 *Disabil* 2000 Jul;21(4):263-96.  
8  
9  
10  
11 30 Tyrer P, Oliver-Africano PC, Ahmed Z, Bouras N, Cooray S, Deb S, et al. Risperidone,  
12  
13 haloperidol, and placebo in the treatment of aggressive challenging behaviour in patients  
14  
15 with intellectual disability: a randomised controlled trial. *Lancet* 2008 Jan  
16  
17 5;371(9606):57-63.  
18  
19  
20  
21  
22 31 Baasland G, Engedal K. [Use of psychotropic medication among individuals with  
23  
24 mental retardation]. *Tidsskr Nor Laegeforen* 2009 Sep 10;129(17):1751-3.  
25  
26  
27  
28  
29 32 Holden B, Gitlesen JP. Psychotropic medication in adults with mental retardation:  
30  
31 prevalence, and prescription practices. *Res Dev Disabil* 2004 Nov;25(6):509-21.  
32  
33  
34  
35  
36  
37  
38  
39  
40  
41  
42  
43  
44  
45  
46  
47  
48  
49  
50  
51  
52  
53  
54  
55  
56  
57  
58  
59  
60

1  
2  
3  
4  
5  
6  
7  
8  
9  
10  
11  
12  
13  
14  
15  
16  
17  
18  
19  
20  
21  
22  
23  
24  
25  
26  
27  
28  
29  
30  
31  
32  
33  
34  
35  
36  
37  
38  
39  
40  
41  
42  
43  
44  
45  
46  
47  
48  
49  
50  
51  
52  
53  
54  
55  
56  
57  
58  
59  
60

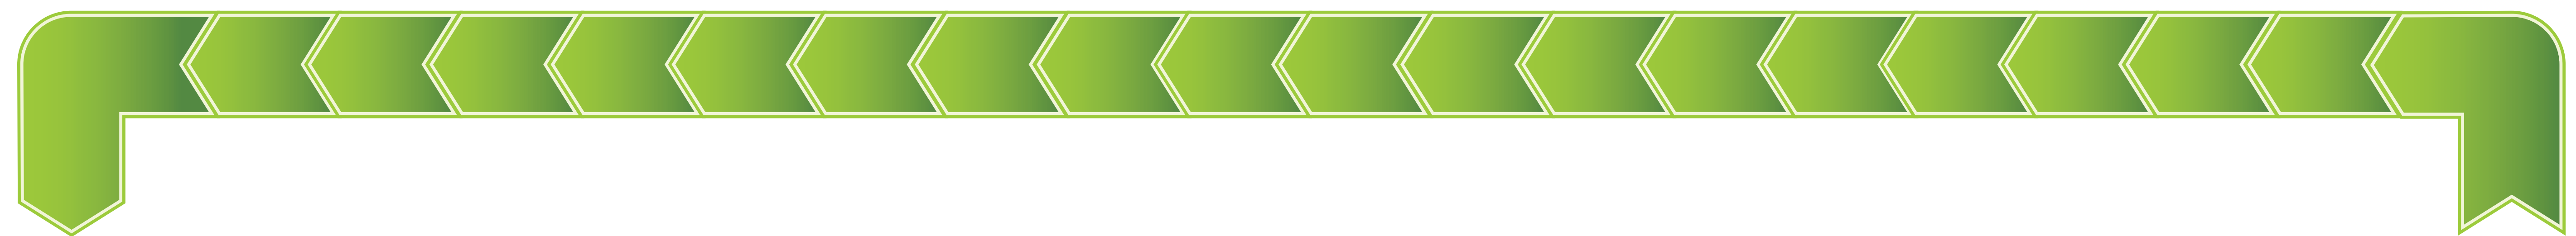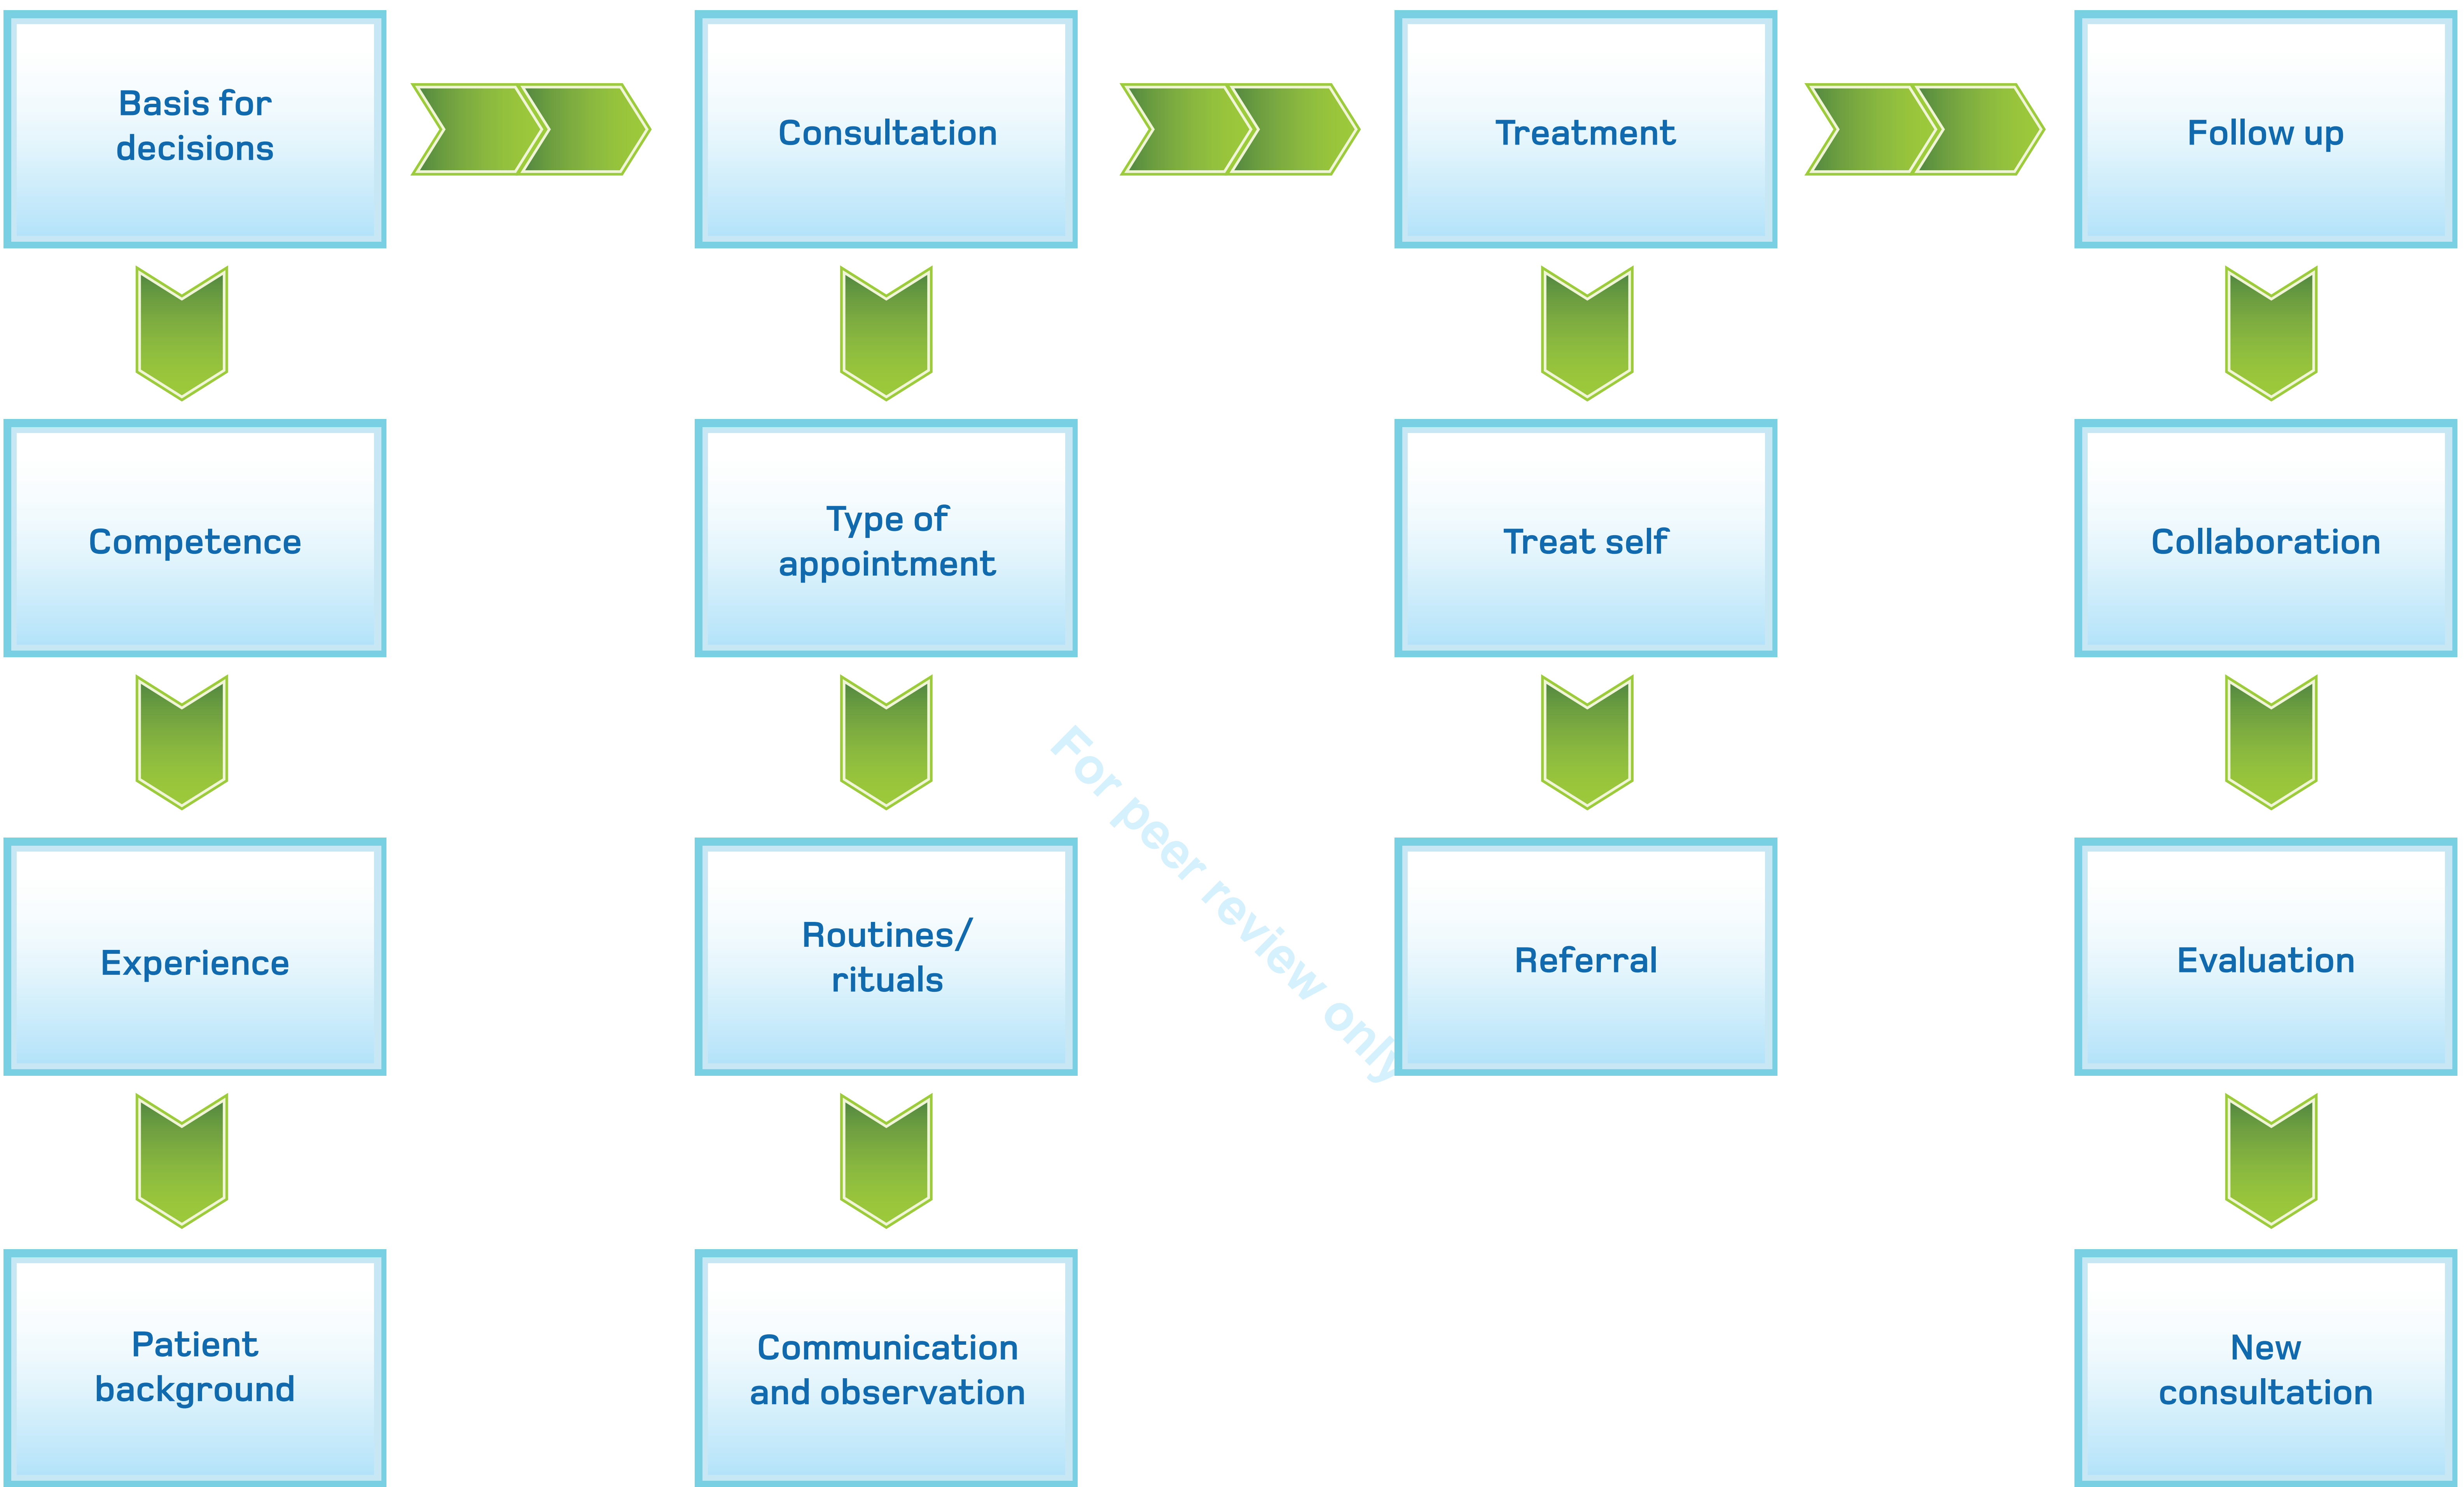

For peer review only - <http://bmjopen.bmj.com/site/about/guidelines.xhtml>

## Research check list - Fredheim et al. 2012

### **Domain 1: Research team and reflexivity**

#### **Personal characteristics**

1. Interviewer/facilitator 1: Terje Fredheim
  2. Credentials: MSc, Master of Learning in Complex Systems
  3. Occupation: PhD-student
  4. Gender: Male
  5. Experience and training: Educated in and have participated in earlier qualitative and quantitative research
- 
1. Interviewer/facilitator 2: Kari Kjøsberg
  2. Credentials: Reg. nurse, MMHC
  3. Occupation: Reg. nurse specialised in mental health care.
  4. Gender: Female
  5. Experience and training: educated in and have participated in different earlier qualitative health research studies.

#### **Relationship with participants**

6. Relationship established: There was no relationship prior to study commencement.
7. Participant knowledge of the interviewer: They were informed about researchers' professional background and interest in the project.
8. Interviewer characteristics: The interviewers' connection with specialised health care may be regarded as bias, but was considered as a minor problem. However the interviewers waited until the interview was over until they presented detailed information about prior experiences and information relevant for the topic.

### **Domain 2: Study design**

#### **Theoretical frame work**

9. Methodological orientation and theory: The study relies on a phenomenological approach with content analysis and systematic text condensation as the main method in analysing data.

#### **Participant selection**

10. Sampling: Names of possible participants were given the interviewers from a senior psychiatrist retired after decades in habilitation services. Our research group regarded this psychiatrist to be the best source to help us find the sample of participants we were looking for. The interviewers then recruited strategically from this list to represent different gender, age, diagnosis and location (rural or city).
11. Method of approach: Participants were first contacted by letter. Two or three days after likely retrieval of the letter, possible participants were contacted by telephone. Information was given and request made, and appointment made with those who were positive.
12. Sample size: Ten participants were interviewed.
13. Non-participation: Five persons refused/hesitated to participate. No drop-outs. The reason for non-participation was not asked for.

#### **Setting**

- 1  
2  
3 14. Setting of data collection: All interviews were conducted in the participants' office or  
4 nearby meeting room.  
5 15. Presence of non-participants: None.  
6 16. Description of sample: Seven males and three females were interviewed. They represented  
7 various age and location (city/rural).  
8  
9

### 10 11 12 **Data collection**

- 13 17. Interview guide: A guide with themes and main questions was provided by the researchers  
14 and discussed with the supervisors. Also a checklist was used to get more information on  
15 topics that seemed important or topics not mentioned by the participant. No pilot was tested.  
16 18. Repeat interviews: Repeated interviews were not used. Participants were encouraged to  
17 contact the interviewers if they wanted to add something and one of them made contact by  
18 telephone to give some more information.  
19 19. Audio/visual recording: Audio recording was used to collect data.  
20 20. Field notes: The two interviewers made field notes during the interviews, and immediately  
21 after each interview.  
22 21. Duration: Interviews lasted 47 – 81 minutes.  
23 22. Data saturation: Saturation and was discussed in the research group after the tenth  
24 interview had been conducted and was then regarded as satisfactory. We were open to the fact  
25 that new themes and important information could appear, but regarded the data material to  
26 contain breadth and depth for the topic investigated.  
27 23. Transcripts returned: Transcripts were not returned to participants for comment or  
28 corrections.  
29  
30  
31

### 32 **Domain 3. Analysis and findings**

#### 33 34 **Data analysis**

- 35 24. Number of data coders: All five in the research group read the complete transcript. One of  
36 the interviewers presented identified meaningful units and themes derivated from the material  
37 and they were discussed in the research group.  
38 25. Description of the coding tree: The coding tree is illustrated with a figure of major and  
39 minor themes.  
40 26. Derivation of themes: Themes emerged from the data.  
41 27. Software: No additional software was used.  
42 28. Participant checking: Participants were offered feedback on the findings. Five of them  
43 expressed a request for feedback when the material had been accepted for publication.  
44  
45

#### 46 **Reporting**

- 47 29. Quotations presented: Participant quotations were used to illustrate findings. Quotations  
48 are not identified in this paper due to a small number of participants.  
49 30. Data and findings consistent: The themes developed by the researcher(s) were logically  
50 consistent and reflective of the data.  
51 31. Clarity of major themes: The major themes are described in the article, and reflect the  
52 research question.  
53 32. Clarity of minor themes: Minor themes are described in the article, and reflect meaningful  
54 units. Diverse cases are described where necessary.  
55  
56  
57  
58  
59  
60



1  
2  
3 **Cover letter Revision 1: Response to editor, and point-by-point response to the concerns**  
4 **of the reviewers.**

5  
6 **Response to editor:**  
7

8 The manuscript has been edited, and all changes are highlighted in the manuscript using  
9 “track changes”. I have deleted all boxes in the right column to ease the reading of the  
10 manuscript. The research group found the peer review process very inspiring, and the  
11 reviewers’ comments have clarified the paper. Point-by-point response to the concerns of the  
12 reviewers has also been provided, and our answers are highlighted.  
13

14  
15 I do hope you find the changes satisfactory, and that the paper now better presents our  
16 findings, and is suitable for publication in BMJ Open.  
17

18  
19  
20 **Point-by-point response to the concerns of the reviewers:**

21 First of all I would like to thank the reviewers for valuable comments on this paper. The  
22 comments have been important for this paper to clarify and present this research.  
23

24  
25  
26 **Reviewer: Elizabeth Barley, senior lecturer, Florence Nightingale School of Nursing and**  
27 **Midwifery, King's College London**  
28

29 This qualitative interview study investigates GPs' experience of people with intellectual  
30 disabilities and mental or behavioural problems.  
31 A minor point: the authors used the term 'handling' people with intellectual disabilities, it  
32 would be preferable if this could be changed to a word with less negative connotations eg  
33 helping or managing or 'working with'.  
34

35  
36 **Answer: Thank you for noticing us on the negative connotations of the term “handling”. It is**  
37 **changed to managing or helping.**  
38

39  
40 Study aim: 'to explore the experiences, competences, attitudes and role of GPs.....' this is  
41 clear, however the term 'competences' should be removed or changed as it is not possible to  
42 determine if the GPs are competent by interviewing them. It could be 'perceived competence',  
43 but you would have to make sure that you addressed this specifically in the interview, which  
44 at the moment it doesn't appear that you have. The same applies to the term role - perhaps you  
45 mean the GPs' 'perceived' role?  
46

47  
48 **Answer: It is changed in accordance to the suggestions from the reviewer. As you say, it**  
49 **could be unclear to talk about competence and roles, since we did not explore that in a**  
50 **quantitative manner. Perceived role and competence is a better description, and this is what is**  
51 **discussed in the results section.**  
52

53 Methods: under participants you state that 'it was estimated that a sample size of 7 to 10  
54 ...would be required to achieve sufficient data and identify key themes' - on what is this  
55 estimate based, the reader needs to be convinced that this is the case in order to believe that all  
56 themes have been captured.  
57  
58  
59  
60

1  
2  
3 Answer: I have removed the part about estimation of sample size, since that is unclear and  
4 impossible to tell for sure. The researchers agreed that the transcripts from the interviews  
5 contained enough material to identify important themes. We can however not be sure that  
6 other important themes and issues could have been captured if even more participants had  
7 been interviewed.  
8

9  
10 setting - this section really describes your data collection process rather than the study setting.

11  
12 Answer: It now contains a bit more about the setting, in addition to a description of the non  
13 existing relationship between the participants and the interviewers.  
14

15 data collection - the two questions cited are very broad, it would be useful to see the topic  
16 guide, the 'additional checklist' that you refer to or a list of prompts used.  
17

18  
19 Answer: A list of additional prompts has been added, with a special focus on the keywords  
20 interesting for this paper.  
21

22 You seem to be interested in whether an evidence based approach is taken, it would be useful  
23 to know what evidence based treatments/management strategies are available - you hint at this  
24 in places but for the non-specialist it would be useful to spell them out.  
25

26  
27 Answer: In the background section we have added a few sentences on this issue.  
28

29 I can't see figure 1, so can't comment on this.  
30

31  
32 Answer: It is not clear why you couldn't see figure 1, but reviewer 2 has commented on this,  
33 and it is now changed due to this comments.  
34

35 I would like to see more quotes which directly support the reported results. For instance, p8  
36 'GPs described limited training...', 'GPs saw the advantage of being a family doctor'.....  
37

38  
39 Answer: Some quotes have been added to more directly illustrate and support the reported  
40 results.  
41

42 P8 'none of them had knowledge of the NMA's internet course' - did you ask them directly?  
43 Also, what is this course?  
44

45  
46 Answer: The participants were asked directly, and some additional information on this course  
47 has been added.  
48

49 Descriptions of some of the examples of patients described by the GPs may help the reader  
50 understand the issues better.  
51

52  
53 Answer: On page 8, in the beginning of the results section, we have added a case description  
54 to help the reader understand the complexity of these issues.  
55

56 Discussion - I agree that your study highlights the complexity of providing services to these  
57 patients.  
58 Your finding that GPs are uncertain/unhappy about the available specialist care is also  
59 important.  
60

1  
2  
3  
4 My main difficulty is around your conclusion that GPs' practice is experience rather than  
5 evidence based - this seems to be true, but what I can't tell from your paper is what evidence  
6 based treatment/policy/guidelines are available. You refer to things such as health checks and  
7 psychotropic medication use, but also state that there is a lack of standard guidelines. Is it the  
8 case that evidence based management strategies are available but that GPs ignore them/are  
9 unaware of them (in which case it would be good to understand why) or is it that the only  
10 option GPs have when dealing with these patients is to rely on their own experience? in which  
11 case it would be good to highlight what their specific difficulties are and how they could be  
12 addressed. From your 'comparison with existing literature' section it seems that the latter case  
13 is more likely, but this needs to be demonstrated consistently throughout the paper before it  
14 can be published. Otherwise this is an interesting paper.  
15  
16

17 **Answer:** Our results demonstrate that the GPs rely mainly on experience based knowledge.  
18 We have added some suggestions to an explanation of this finding in the "discussion section".  
19 Some more specific information on the availability of literature and courses on this topic have  
20 been added. The question of evidence based practice is not a case of either/or, but the  
21 situation is complex, and it can be that ignorance, poor availability of courses/literature, little  
22 focus on this group of patients and trust in own experience together can explain the results  
23 better. We hope this is better demonstrated through the paper in the revised version.  
24  
25

26 Finally, you could make more of the fact that this is an under-researched area and the equity  
27 of care implications. You should be commended on starting to address this!  
28

29 **Answer:** Thank you for pointing this out. This fact is addressed with more clarity a couple of  
30 places in the revised paper.  
31

32  
33 As far as I can tell there are no conflicts of interest. I can't see a number relating to the ethical  
34 approval.  
35

36 **Answer:** The number relating to the ethical approval is 10-2008 SI.  
37

38 **Reviewer: Yona Lunsky, PhD**  
39 **Centre for Addiction and Mental Health**  
40 **Toronto, Canada**  
41

42 I have no competing interests in reviewing this manuscript.  
43

44  
45 This is a qualitative study and so some of the methodological questions do not apply but there  
46 is no N/A choice. I think their description of their coding process was clear.  
47 In this study, participants are doctors, not patients but they are well described. That being  
48 said, it is important because this is an international audience to provide some information  
49 about the training of GPs as it relates to intellectual disabilities in addition to policy and  
50 services in the jurisdiction where this is written. The role of the GP and resources available to  
51 the GP vary by jurisdiction.  
52

53  
54 I would have liked to have seen further illustrative quotes to support some of the ideas put  
55 forth.  
56  
57  
58  
59  
60

1  
2  
3 Answer: Several quotes have been added, as the same comment was put forth from reviewer  
4 one as well.  
5

6 I thought this was a very interesting brief paper on a topic that does not receive significant  
7 research attention in mainstream medical journals. Using qualitative data, it provides a model  
8 to describe the process by which physicians work with this patient group (patients with ID and  
9 MBP) in their practice. The findings are important and speak to the need for further education  
10 and resources for GPs.  
11

12  
13 In general, I would like to see further illustrative quotes along with a richer discussion and  
14 contextualizing of findings. This would give greater assurance that the qualitative findings are  
15 accurate. It would be important to refer further to other qualitative studies on the experience  
16 of physicians serving this population. (ex. Wilkinson et al 2012. IDD, 50(3), 243-250). There  
17 are also qualitative studies of physicians working hospital settings that would be relevant. It  
18 might also be important to contextualize the experience of doctors with the experience of  
19 patients as part of the discussion. Several papers have been written on that. Some parts of the  
20 results do not seem particularly focused on issues unique to patients with ID and MBP. THIS  
21 is important to comment on. Other issues are more specific to the MBP issues, particularly  
22 decisions around treatment and working with other professionals. If the theme of this paper is  
23 the unique challenges of MBP, then this should be made quite salient.  
24  
25

26 Answer: This is a comment that helps to clarify and increase the quality of the paper. Some  
27 further illustrative quotes have been added, and a case description has been added to help the  
28 reader understand the complexity of the issues in this paper. The findings from Wilkinson et  
29 al. have been described and added, both in the background section, and comparison with  
30 existing literature section. The paper has also been more focused on the special MBP issues,  
31 by adding specific information about education and papers, giving some description of typical  
32 challenges faced by the GPs, and discussing this unique challenge in the "discussion section".  
33  
34

35 I offer some specific comments below:

36 With regard to available tools and resources, there are guidelines and tools for GPs available  
37 and it could be helpful to make reference to them (e.g., Canadian Consensus Guidelines on  
38 Developmental Disabilities, Cdn Fam Physician, 57, 541-53).  
39

40  
41 Answer: These Canadian guidelines have been described shortly in the background section,  
42 and are also mentioned as a starting point to provide GPs with important peer reviewed  
43 literature on this topic.  
44

45 I think the figure is a helpful guide to understand study results but there are some  
46 inconsistencies between the paper and figure that could be corrected.  
47

48 The first box on left hand side: Before consultation could be changed to BASIS for Decisions,  
49 or Basis for treatment. The bottom box in that column could be renamed patient background  
50 because it is not about the patient's knowledge but about knowledge the GP has on the  
51 patient's background.  
52

53  
54 SEcond column: Type could be revised to read type of appointment. THE next two boxes,  
55 routines/rituals and communication/observation, get confused in the results section. It would  
56 be clearer if the text on page 10 begins with discussion of patient rituals and routines, and  
57 then a discussion on communication and observation.  
58  
59  
60

1  
2  
3  
4 Answer: The figure is now corrected in response to these comments, and the results section  
5 better correspond to the figure when it comes to results in the subcategory “consultation”.  
6

7 Treatment (pg 11)

8 the GP is actually making 1 decision with 2 choice options. COuld be rewritten as two choices  
9 the GP has when trying to solve the patient's...  
10

11 Answer: This has been corrected in response to the comment.  
12

13 Evaluating and Continuing Treatment (p13)

14 It was not clear to me whether the GPs felt like the meetings with non physicians  
15 ("Collaborators") were tailored in part to them ("structured towards their attendance") or  
16 whether they felt "left alone" in that process. Maybe the authors wanted to suggest that GPs  
17 felt including in discussions sometimes but others felt excluded. THis is an important finding  
18 so it needs to be clear. Is the sense of isolation because the GP does not feel like an expert or  
19 because the GP is excluded or feels excluded from these meetings?  
20  
21

22 Answer: This is important to clarify. Some additional information and quotes are added to  
23 better describe the situation the GPS are faced with, especially on p 14 and 15. The feeling of  
24 “being left alone” was mentioned when they were faced with medical questions, and the GPs  
25 had no collaborators to discuss these issues with in collaborative meetings.  
26  
27

28 Discussion

29 Summary of main findings: I did not think that this paragraph adequately summarized study  
30 findings.  
31

32 Answer: The summary of main findings has been changed to better describe the findings as  
33 the revised paper now appears.  
34  
35

36 Comparison with existing literature:

37 I do not think this section compares existing literature adequately. The only literature  
38 included is on efficacy of medications. There is a broader literature on physician preparedness  
39 and comfort. It would also be important to discuss training initiatives in the author's  
40 jurisdiction but also internationally to assist in helping GPs to feel more competent. Some key  
41 papers were not included here, including the work of Nick Lennox on physician attitudes and  
42 knowledge.  
43  
44

45 Answer: The comparison with existing literature have been extended. When it comes to  
46 training initiatives, some information about this issue have been written in the background  
47 section.  
48  
49  
50  
51  
52  
53  
54  
55  
56  
57  
58  
59  
60



**Intellectual disability and mental health problems:  
a qualitative study of general practitioners' views**

|                                 |                                                                                                                                                                                                                                                                                                                                        |
|---------------------------------|----------------------------------------------------------------------------------------------------------------------------------------------------------------------------------------------------------------------------------------------------------------------------------------------------------------------------------------|
| Journal:                        | <i>BMJ Open</i>                                                                                                                                                                                                                                                                                                                        |
| Manuscript ID:                  | bmjopen-2012-002283.R2                                                                                                                                                                                                                                                                                                                 |
| Article Type:                   | Research                                                                                                                                                                                                                                                                                                                               |
| Date Submitted by the Author:   | 11-Feb-2013                                                                                                                                                                                                                                                                                                                            |
| Complete List of Authors:       | Fredheim, Terje; Sykehuset Innlandet, Religionspsykologisk senter Haavet, Ole; University of Oslo, Department of General Practice Danbolt, Lars; Innlandet Hospital Trust, Psychology of religion Kjøsberg, Kari; Innlandet Hospital Trust, Psychology of religion Lien, Lars; University College of Hedmark, Faculty of Public Health |
| <b>Primary Subject Heading</b>: | General practice / Family practice                                                                                                                                                                                                                                                                                                     |
| Secondary Subject Heading:      | Qualitative research, Mental health                                                                                                                                                                                                                                                                                                    |
| Keywords:                       | Intellectual disability, General practice, MENTAL HEALTH, Challenging behaviour, QUALITATIVE RESEARCH                                                                                                                                                                                                                                  |
|                                 |                                                                                                                                                                                                                                                                                                                                        |

SCHOLARONE™  
Manuscripts

1  
2  
3 **Intellectual disability and mental health problems:**  
4  
5  
6 **a qualitative study of general practitioners' views**  
7  
8  
9

10 Terje Fredheim<sup>1,4\*</sup>, Ole R Haavet<sup>4</sup> Lars J Danbolt<sup>1,3</sup>, Kari Kjøsberg<sup>1</sup>, Lars Lien<sup>1,2</sup>,  
11  
12

13  
14  
15 <sup>1</sup>Centre for Psychology of Religion, Innlandet Hospital Trust (SIHF), Hamar, Norway  
16

17 <sup>2</sup> Faculty of public health, University College of Hedmark, Elverum, Norway  
18

19 <sup>3</sup>Norwegian School of Theology, Oslo, Norway  
20

21 <sup>4</sup>Department of General Practice, University of Oslo, Oslo, Norway  
22  
23  
24

25  
26 \* Corresponding Author:  
27

28 Terje Fredheim, Religionspsykologisk Senter, Postboks 68, N-2312 Ottestad  
29

30 E-mail: [terje.fredheim@sykehuset-innlandet.no](mailto:terje.fredheim@sykehuset-innlandet.no)  
31  
32

33 Phone: 0047 - 41219155  
34  
35  
36  
37  
38  
39  
40  
41  
42  
43  
44  
45  
46  
47  
48  
49  
50  
51  
52  
53  
54  
55  
56  
57  
58  
59  
60

## Article summary

### Article focus

- The aim of this study was to investigate the general practitioners (GPs) experiences in managing people with intellectual disabilities and mental/behavioural problems (MBP) in order to identify factors related to high quality services, important areas for improvement and suggest fields for further exploration.

### Key messages

- This study shows that GPs have different opinions on central subjects in providing high quality services to people with ID and MBP.
- Even GPs with an assumed high competence and engagement in this patient group, lack evidence based knowledge and base their actions on experience based practice.
- GPs are concerned about the competence in specialist departments when it comes to treatment of MBP in people with ID

### Strengths and limitations in this study

- Participants were of both genders, from several localities and had a broad range of patients with ID and MBP.
- As far as we know, this is the only study that has addressed GPs experiences with people with ID and MBP.
- Although data across participants were found sufficient, a small group of participants were interviewed.



## Abstract

**Objectives** To investigate general practitioners' (GPs) experiences in managing patients with intellectual disabilities (ID) and mental and behavioural problems (MBP).

**Design** Qualitative study using in-depth interviews.

**Setting** General practice in Hedmark County, Norway.

**Participants** 10 GPs were qualitatively interviewed about their professional experience regarding patients with ID and MBP. Data were analysed by all authors using systematic text condensation.

**Results** The participants' knowledge was primarily experience based and collaboration with specialists seemed to be individual rather than systemic. The GPs provided divergent attitudes to referral, treatment, collaboration, regular health checks and home visits.

**Conclusions** GPs are in a position to provide evidence-based and individual treatment for both psychological and somatic problems among patients with ID. However, they do not appear to be making use of evidence-based treatment decisions. The GPs feel that they are left alone in decision making, and find it difficult to find trustworthy collaborative partners. The findings in this study provide useful information for further research in the field.

## Introduction

People with intellectual disabilities (ID) are particularly vulnerable to health problems and experience difficulties in meeting their health care needs.<sup>1-7</sup> Two recent attempts provide a focus to this challenge: a consensus manifesto by the European Association of Intellectual Disability Medicine<sup>8</sup> and an independent inquiry on a request from the British Secretary of State for Health.<sup>9</sup> These reports share the goal of improving health care services for people with ID, but the extent to which their recommendations have been implemented remains dubious. Similarly, guidelines have been developed in other countries.<sup>10-12</sup> Courses are also available, for instance in Norway an internet course from the Norwegian Medical Association<sup>14</sup>, and internationally a course from the International Association for the Scientific Study of Intellectual and Developmental Disabilities (IASSID).<sup>13</sup> It is however not clear how widely such training programs for GPs are used.

A recent meta-analysis has shown that the prevalence of ID is approximately 1%.<sup>15</sup> Prevalence of mental health problems among people with ID vary in different studies from 14% to 60% and can be difficult to identify and diagnose.<sup>16</sup> There is considerable overlap between mental health problems and challenging behaviour<sup>17,18</sup>; these two complications are often inseparable, suggesting that there is little to gain from distinguishing between them when trying to identify implications for health workers. To detect and treat people with ID and mental and behaviour problems (MBP) is a test of the competence of the general practitioner (GP). Doctors specialising in general practice acquire knowledge about the early and general presentation of diseases, and early treatment and follow-up of chronic disease. GPs play a central role because of their familiarity with other primary health care services, as gate-keepers to specialist health care and in evaluating treatment and cooperate with the patient, family and other service providers.<sup>19-22</sup>

1  
2  
3 Each Norwegian GP has 5 to 10 patients with ID on their list. Some of these patients  
4 will have MBP, which potentially influences their physical health, including poor diet; erratic  
5 compliance with medication; and behaviour that can affect physical health, creating the need  
6 for close care and structure in health services.<sup>23</sup> A qualitative study has identified areas of  
7 discomfort when it comes to proper educational training for GPs, to meet the health needs of  
8 people with ID.<sup>24</sup> Results from another qualitative study with participants with ID showed  
9 that the participants wanted GPs with ability to listen interestingly, take the patient seriously  
10 and take the time to explain and demonstrate medical investigations.<sup>7</sup> GPs attitudes towards  
11 people with ID were investigated in a study. Although GPs held positive attitudes to  
12 managing ID patients they were not so willing to give more time in consultation.<sup>25</sup>  
13  
14  
15  
16  
17  
18  
19  
20  
21  
22  
23  
24

25 The importance of closely monitored care and high-quality health services to meet the  
26 challenge of inequality in health services for people with ID has provided the focus for several  
27 papers.<sup>1,3,5,6,26</sup> There are however few studies that have looked at the way GPs are working  
28 with patients with ID and MBP. The aim of our research was to explore the experiences,  
29 attitudes and perceived role and competence of GPs providing health services to patients with  
30 ID, with a special focus on patients with ID and MBP.  
31  
32  
33  
34  
35  
36  
37  
38

## 39 **METHODS**

### 40 **A qualitative method**

41  
42  
43 We opted for a qualitative approach, in order to obtain more detailed descriptions of the GPs'  
44 experiences serving patients with ID and MBP. In-depth interviews are suitable in inquiring  
45 about the GP's experiences, facilitating a deeper understanding of their opinions and  
46 attitudes.<sup>27,28</sup> We preferred open interviews to focus on each participant's descriptions and  
47 experiences, and bringing narratives into the method, by giving participants the opportunity to  
48 provide meaning to their responses.  
49  
50  
51  
52  
53  
54  
55  
56  
57  
58  
59  
60

## Participants

Data were drawn from a total of 10 interviews with 10 participating GPs aged 41 to 64 (table 1). Participants were chosen following recommendations from an acknowledged senior psychiatrist with more than 30 years of experience with ID patients in collaboration with GPs in Hedmark County. There are 173 GPs in Hedmark, and the senior psychiatrist considered 25 of them to have more than the usual level of experience with ID patients and a relatively large number of ID patients on their list. A letter was sent to 15 of these GPs, purposefully selected with regard to geographical location and gender. 10 GPs were able to participate, 3 GPs refused to participate, and 2 GPs did not respond. Participation in this study was voluntary, and each participant signed an informed consent form, and was informed of their right to withdraw from the study at any time, without further explanation.

TABLE 1

| Participant number | Age | Gender | Location | Total number of patients | Approximate number of ID patients | Reported number. of ID patients with psychiatric/behavioural challenge |
|--------------------|-----|--------|----------|--------------------------|-----------------------------------|------------------------------------------------------------------------|
| 1                  | 58  | F      | Rural    | 950                      | 6                                 | 2                                                                      |
| 2                  | 61  | M      | City     | 1200                     | 3                                 | 2                                                                      |
| 3                  | 60  | M      | Rural    | 800                      | 14                                | 4                                                                      |
| 4                  | 64  | M      | City     | 2500                     | 20                                | 10                                                                     |
| 5                  | 60  | M      | Rural    | 750                      | 15                                | 6                                                                      |
| 6                  | 61  | M      | City     | 1000                     | 5                                 | ?                                                                      |
| 7                  | 60  | M      | City     | 1100                     | 30                                | 20                                                                     |
| 8                  | 42  | F      | Rural    | 850                      | 7                                 | 3                                                                      |
| 9                  | 59  | M      | Rural    | 1000                     | 12                                | 6                                                                      |
| 10                 | 41  | F      | Rural    | 1300                     | 10                                | 5                                                                      |

*Participants' number, age, gender, location, total number of patients, approximately number of patients with ID, and reported number of ID-patients with mental or behavioural problems*

## Setting

All 10 interviews were conducted in the GPs' offices, located in Hedmark county, an agricultural county with small towns and a total population of approximately 190 000. The interviews lasted 41–81 minutes, with a mean of 57 minutes. Interviews were conducted from October to November 2011 and were audio recorded. All but one interview was conducted by two of the authors (TF and KK), and there were no former relationship between the participants and the interviewers. The interviews were planned, the participants were prepared on the topic and had allocated time for the interview. The interview consisted of open-ended questions based on an interview guide with two main questions:

1. What are your experiences with ID patients who have additional mental health problems and/or challenging behaviour?
2. What do you think is the GP's role for these patients?

The additional checklist was used to gather information that was otherwise missing or to provide greater depth or breadth to incomplete information. Follow-up questions were taken from a list of keywords; number of patients with ID on the GP's patient list, collaborative partners, regular health checks, specific training on the topic, perceived knowledge, knowledge of evidence based literature on the topic and attitude towards psychotropic treatment of people with ID.

## Analysis

The interviewers made field notes with the participants' frequently used words, phrases and other statements requiring follow-up. Pauses, engagement, laughter and gestures were also noted, and the field notes were used in addition to the total transcripts. The 10 interviews generated approximately 119 pages of single-spaced text. Analysis of transcripts was

1  
2  
3 conducted using systematic text condensation.<sup>27,29,30</sup> The first author read the transcripts  
4  
5 several times to obtain a sense of the whole. The other authors independently read the  
6  
7 transcripts and identified meaningful units, themes and subthemes, trying to capture the  
8  
9 “essential expression”. These findings were discussed among the authors.  
10  
11

## 12 RESULTS

13  
14  
15  
16 During the interview, GPs described their experiences, consultations and collaboration with a  
17  
18 variety of relatives and professionals. Case presentations included descriptions of ID patients  
19  
20 with complex medical, psychiatric and behavioural challenges. GPs shared examples of what  
21  
22 kind of challenges they were faced with managing these patients. It could be a patient with  
23  
24 Down syndrome, psychiatric illness and difficult to control diabetes. Other patients could be  
25  
26 aggressive both verbally and physically and not willing to participate in tests in a typical  
27  
28 consultation at the doctor’s office. Some of the patients lived alone with little community  
29  
30 services, and were having a lifestyle with several potential harmful traits, like smoking,  
31  
32 drinking alcohol or eating disorders, and limited cognitive resources to understand the  
33  
34 consequences of their actions.  
35  
36  
37

38 As a model of analysis, the process of a consultation emerged from the material as the  
39  
40 best description of the GPs’ experiences with this group of patients (figure 1). This model  
41  
42 illustrates a GP’s pathway through a consultation with four main categories: basis for  
43  
44 decisions, consultation, treatment and follow-up.  
45  
46  
47

48  
49 -----  
50 Figure 1 approximately here  
51  
52 -----  
53  
54  
55  
56  
57  
58  
59  
60

## Basis for decisions

The main category, *basis for decisions*, epitomizes the GP's knowledge and experience in the context of the patient group and describes their medical education, experiences, courses and relevant post-graduate education on this topic. The GPs described limited training in patients with ID from their medical school or post-graduate courses. On direct question, none of the GPs' had knowledge of The Medical Associations internet-based course on the topic.

*The Norwegian Medical Association arranges a lot of courses, but I have until today's date never seen a course on this topic. (GP #6)*

When the GPs' were directly asked on what basis they treated these patients there was no mention of articles, books or peer-reviewed journals on the topic:

*I think... those medications that I am used to prescribing, and that I know are effective in any or another way, I will use them as a common guideline. (GP #1)*

*I have common knowledge about patients and psychiatry. I have a large number of patients and I have years of experience. (GP #4)*

*It might be revealing, but I use common sense and my own experiences. (GP #9)*

*I haven't read any literature on this theme, but I have learned some in collaborating with Habilitation services. (GP #6)*

1  
2  
3 Knowledge of the patients' background and continuity in the relationship between  
4 patient and physician were seen as key issues in providing the best service. Furthermore these  
5 GPs saw the advantage of being a family doctor, improving the relationship to the patients  
6 allowing the GP to make a better job of evaluating the biological, psychological and social  
7 strengths of the patients. As one participant said:  
8  
9  
10  
11  
12

13  
14  
15  
16 *The family will be a support system for the patient anyway, so I see this as a great*  
17 *advantage. (GP #6)*  
18  
19

20  
21  
22  
23 *A patient of me, his sister and sister's child are my patients. His sister has been here,*  
24 *lying on the bench pregnant. He knows this, and we talk a little about it. It seems to*  
25 *make him more comfortable and familiar with the situation when he knows I am*  
26 *helping more of his family as well. I can measure his blood pressure and do blood*  
27 *samples, some thing he was not able to do at his former GP. (GP #1)*  
28  
29  
30  
31  
32  
33

34  
35  
36 A key finding in this category is that most of the treatment is founded on experience-  
37 based knowledge. The material was rich in descriptions of patient histories, organisational  
38 system changes and historical events in the ID health care service, together with private  
39 memories from childhood or random meetings with people with intellectual disability.  
40 Because experiences are individual, there were many different stories, opinions and points of  
41 view.  
42  
43  
44  
45  
46  
47  
48  
49  
50  
51

52 *Already in primary school I went to a school where people with ID were integrated.*  
53 *Having contact with people with ID has never been strange or unfamiliar for me. (GP*  
54 *#8)*  
55  
56  
57  
58  
59  
60



## Consultation

The second main category, *consultation*, covers type of consultation, communication and individual routines or rituals by either the GP or the patient. First there are descriptions of various types of consultations which can occur in either the office or the patient's home: acute consultation, planned evaluations of treatment and prescriptions, and health checks. The GPs varied in their opinions about the benefits and possibilities of seeing the patient at home, as quotes from these two doctors illustrate:

*Home visits are soon to become a closed chapter in general practice, but with these patients I find it necessary to do home visits. Then I can see with my own eyes how things appear at home (GP #5).*

*They need to be observed and... it is not always easy for a GP to be able to observe. A GP should stay in the office and be available for patients (GP #4).*

Furthermore the GPs have different opinions about the benefits and possibilities of regular health checks for this patient group. Lack of standard guidelines opens the door for individual solutions and a variety of explanations. One participant highlighted this patient group as bad requesters of health care, requiring closer follow-up:

*We may not be optimally good at this, but we try to do it once a year, and that is about were it ends. Some have a health problem that leads to more frequent consultations; in those cases a yearly health control is less important. But in general these are patients who don't tend to promote themselves. (GP #9)*

1  
2  
3  
4  
5 There were descriptions of patients who went through special routines and rituals in  
6  
7 their GP's office. It seemed to be important for the relationship between the GP and the  
8  
9 patient that these routines be followed; the patient tended to be calmer allowing the doctor to  
10  
11 undertake the necessary investigations. As one participant said:  
12  
13

14  
15  
16 *He is sitting here, takes a glass of water, sits down again and drinks some water.*

17  
18 *Sometimes I am able to check his blood pressure and do blood tests. He was not able*  
19  
20 *to do that with his previous GP (GP #1).*  
21  
22

23  
24  
25 Communication and observation is another cluster of experiences in this category. Some of  
26  
27 these patients are obviously anxious about a consultation, and all GPs said that their focus was  
28  
29 on the patient, communicating directly with the ID patients, even though they were  
30  
31 accompanied by others. If something could not be done because of unwillingness or  
32  
33 restlessness, they did not push the patient, but booked another appointment in the near future.  
34  
35

36  
37 Our participants argued that their patients' should be accompanied by someone who  
38  
39 knows the patient, their medical history and the reason for the consultation. Yet patients with  
40  
41 communication problems were sometimes accompanied to the doctor's office by health  
42  
43 workers with limited knowledge of the patient. Because GPs must rely on information from  
44  
45 accompanying persons, they would sometimes send the patient home with a new appointment.  
46  
47 As one participant said:  
48  
49

50  
51  
52 *It is essential that we have confidence in the information we are given. And that it is*  
53  
54 *not exaggerated, hyped or trivialized, but is a sober description that it is possible for*  
55  
56 *me as a GP to navigate towards (GP #7).*  
57  
58  
59  
60

1  
2  
3  
4  
5 Some participants were more likely to use systematic consultations and follow-up,  
6 especially if the patient had chronic somatic problems. Nevertheless, the somatic problem,  
7 rather than the ID and MBP constituted the main reason for systematic and frequent  
8 consultations.  
9  
10  
11  
12

### 13 14 15 **Treatment**

16  
17 This third main category covers the choice the GP must make in trying to solve the patient's  
18 medical or mental health problem: to treat the patient or refer to a specialist. The participants  
19 expressed insecurity about how to treat and what to do with these patients. They described  
20 types and possibilities when they wanted to treat the patient themselves following these  
21 justifications: i) lack of confidence that a specialist would do the best job with these patients  
22 or ii) they believed the referral would be refused by the specialists' health services. This  
23 participant illustrates the lack of confidence in specialist services, and trust in own  
24 competence:  
25  
26  
27  
28  
29  
30  
31  
32  
33  
34  
35  
36  
37

38 *I have to call a random chief doctor at the local psychiatric institution, because that is*  
39 *what the habilitation services relies on... then I think I will do this better by myself.*  
40  
41 *(GP #5)*  
42  
43  
44  
45

46 There were descriptions of all types of treatment, including check for somatic reasons for  
47 restlessness, behaviour modification, environmental actions and medical treatment. When the  
48 participants' referred these patients to specialist health services for their MBP, it was mainly  
49 for diagnostic work or medication queries. It was more common for the GPs to mention the  
50 name of a specialist rather than a specialist department.  
51  
52  
53  
54  
55  
56  
57  
58  
59  
60

1  
2  
3 *If I wanted to refer a patient with these problems, NN was the person. (GP #3)*  
4  
5

6  
7 *NN2, a psychiatrist with long experience, is easy to turn to, because he provides good*  
8  
9 *answers to my questions. (GP #8)*  
10  
11

12  
13  
14 Some of the GPs interviewed had created a private system to ensure systematic  
15  
16 follow-up: prescribing medication over the short term and developing exclusive lists with  
17  
18 patient data and consultation frequency.  
19

## 20 21 **Evaluation and continuing treatment** 22

23  
24 This fourth main category constitutes a cluster of descriptions covering collaboration,  
25  
26 evaluation of treatment effects and routines for follow-up consultations. The participants  
27  
28 reported their experiences with collaborative partners – particularly how they evaluated the  
29  
30 effects of psychotropic medication.  
31  
32

33 A patient with ID and MBP nearly always involves one or more collaborative partners.  
34  
35 Interdisciplinary meetings were described as useful if the GPs had the opportunity to  
36  
37 participate. The GPs were not sure if they were invited to all meetings, but had the impression  
38  
39 that their attendance and competence was wanted. There were descriptions of meetings with  
40  
41 parents, community mental health workers, psychiatrists, psychologists and nursing home  
42  
43 employees, but they differed in type, in the frequency of the GPs' attendance and in the  
44  
45 priority they placed on them.  
46  
47  
48  
49

50  
51 *I try to attend every primary meeting with collaborative partners. (GP #9)*  
52  
53

54  
55 *I am not often called in to primary meetings. I am, in a few cases, where medical*  
56  
57 *issues are central. (GP #7)*  
58  
59  
60

1  
2  
3  
4  
5 The GPs that attended usually found meetings with collaborators useful, despite the fact that  
6  
7 most of these meetings dealt with issues far from the GPs' areas of expertise. Some described  
8  
9 meetings in which specific parts were structured towards their attendance, and this was  
10  
11 considered to lower the barriers of GP attendance. Even though the GPs met a group of  
12  
13 several collaborators facing the challenges of a patient, they felt alone in issues regarding  
14  
15 medical questions for patients with ID and MBP. The feeling of being left alone was  
16  
17 mentioned by several participants, but one participant was particularly clear about it:  
18  
19

20  
21  
22  
23 *I feel really alone on this topic with these patients. I don't really know what to do. (GP*  
24  
25 *#10)*

26  
27  
28  
29 The participants admit facing challenges in evaluating the effects of psychotropic  
30  
31 medication. Some argued for systematic evaluation of and specific feedback on their patients'  
32  
33 behaviour by parents or health care workers, in order to assess the effect of medication:  
34  
35

36  
37  
38  
39 *I need observations and detailed feedback. There's no point in continuing a treatment*  
40  
41 *if it isn't effective. Systematic feedback is the required way of working. (GP #7)*

42  
43  
44  
45 Others wanted a standard feedback sheet:

46  
47  
48  
49 *Then you can have a summary over a longer time perspective, rather than some*  
50  
51 *random reports. But I don't know where to get these schemes. (GP #10)*  
52  
53  
54  
55  
56  
57  
58  
59  
60

1  
2  
3 As schemes or more objective feedback forms were not often provided, the participants were  
4  
5 forced to rely upon normative assessments provided by accompanying health workers or  
6  
7 parents.  
8  
9

## 10 **DISCUSSION**

### 14 **Summary of main findings**

16  
17 The results in this study highlight the complexity of providing GP services to people with ID  
18 and MBP. The GPs interviewed in this study were strategically selected and were expected to  
19 have above-average engagement and competence with this patient group. Evidence-based  
20 medicine requires a combination of clinical expertise, best available external evidence and  
21 individual patient needs and choices.<sup>31</sup> The competence of the participants in this study is  
22 generally experience-based on this topic and therefore characterised by individual opinions  
23 and ways of working. The participants described limited education on ID issues, and none  
24 could refer to any scientific article, book or report on this topic. Even though there has been a  
25 course directed to GPs on ID patients, with a subcategory on MBP, none of the participants  
26 had attended it. This study implies that GPs with more than usual level of experience and  
27 interest in patients with ID and MBP, rely on experience based knowledge, and have limited  
28 knowledge of articles, guidelines, reports or books on this topic. The fact that management of  
29 patients with ID and MBP rarely is taught in medical school and the only course available is  
30 an *internet course* may contribute to the understanding of limited evidence based knowledge  
31 among the participants. In addition, our results imply that this topic is rarely mentioned in  
32 scientific papers or on conferences and courses with GP participation.  
33  
34  
35  
36  
37  
38  
39  
40  
41  
42  
43  
44  
45  
46  
47  
48  
49  
50  
51  
52  
53  
54  
55  
56  
57  
58  
59  
60

## Strengths and limitations of the study

The participants in this study were strategically selected, thereby representing a relatively homogenous group. This situation creates an obvious threat to external validity, and may limit the generalisation of our results. Nevertheless the interviewees revealed diverse opinions and descriptions of their managing of ID patients with MBP, thereby strengthening our impression that this is an important research topic, albeit rarely investigated or highlighted in national or international settings. Everyone in our research group has read and analysed the transcripts and independently noted meaningful units. The group comprises researchers and clinicians from several areas, thereby limiting the threat of a subjective finding with idiosyncratic perspectives and limited objective value. Our findings can be transferred to clinical situations and can provide a good starting point for further research in the field.

## Comparison with existing literature

There is no hard evidence for the necessity and efficacy of using psychotropic medication for treating MBP in people with ID.<sup>11,32-34</sup> The fact that none of the GPs interviewed could mention any scientific paper that addresses this problem supports the finding that this as an experience-based field, in which doctors rely on general competence valid for people without ID. This is a noteworthy result, especially given the assumption that 70% of psychotropic medication to this patient group is prescribed by the GP alone, without collaboration with a psychiatrist.<sup>35,36</sup> Furthermore the results are in line with findings from another qualitative study that addressed the educational needs of family physicians of people with ID, pointing out a need for modifications of their education.<sup>24</sup> The GPs interviewed focused on communicating with the person with ID, giving them time to do their rituals, and the importance of building relations with the patients. People with ID have provided useful information in a qualitative study, focusing on the importance of practical issues like patience, demonstrations of medical investigations and communication with the patient, not the support

1  
2  
3 person.<sup>7</sup> These attributes of a good patient doctor relation are also mentioned by patients with  
4  
5 chronic problems without ID.<sup>37</sup>  
6  
7

## 8 **Implications for future research and clinical practice**

9

10 The results demonstrate a major challenge to treatment of MBP in people with ID: None of  
11  
12 the participants was sure how to treat these patients themselves, yet they were unsure where to  
13  
14 refer their patients if they found the situation too complicated for primary health care  
15  
16 treatment alone. They tended to distrust specialist health services. In some areas of the county,  
17  
18 the GPs mentioned a local hospital psychiatrist, and other participants mentioned specific  
19  
20 persons with whom they could collaborate. All in all, these statements serve to underline the  
21  
22 importance of knowledge and information exchange between potential collaborative partners.  
23  
24  
25

26 Our study shows that GPs' managing of patients with ID and MBP is primarily based  
27  
28 upon experience-based knowledge – as told explicitly and as demonstrated through individual  
29  
30 descriptions of managing and treatment. The GPs' opinions about working with ID patients is  
31  
32 based on their own experience with this patient group, and with their general competence  
33  
34 related to patients without ID. Attention should be focused on the ways in which medical  
35  
36 training and post-graduate education can fill the competence gap, to ensure that this field  
37  
38 becomes evidence-based rather than merely experience-based. Guidelines for GP  
39  
40 management of people with ID, with a subcategory focusing on MBP should be developed  
41  
42 and disseminated in Norway.  
43  
44  
45  
46  
47  
48  
49  
50  
51  
52  
53  
54  
55  
56  
57  
58  
59  
60



## Acknowledgements

The authors would like to thank the GPs for their participation. We gratefully acknowledge the fact that the research is funded by The Norwegian Medical Association, but the views expressed are those of the authors alone.

## Funding

This study was funded by the Norwegian Medical Association. The funding body had no involvement in the research process or in the writing of this article.

## Competing interests

All authors have completed the ICMJE uniform disclosure form at [www.icmje.org/coi\\_disclosure.pdf](http://www.icmje.org/coi_disclosure.pdf) (available on request from the corresponding author) and declare: no support from any organisation for the submitted work; no financial relationships with any organisations that might have an interest in the submitted work in the previous three years; and no other relationships or activities that could appear to have influenced the submitted work.

## Ethics approval

The Norwegian regional committee for medical research approved this study, ethical approval number 10-2008 SI.

## Contributors

TF contributed to acquisition of data, transcription, analysing data, drafting and critical revision of the article and approval of the final version. ORH, LJD and LL contributed to the design of the study, analysing data, critical revision of the article and approval of the final

1  
2  
3 version. KK participated in the interviews, analysing data, critical revision of the article and  
4  
5 approval of the final version.  
6  
7

### 8 **Data sharing** 9

10 No additional data available.  
11  
12  
13  
14  
15  
16  
17  
18  
19  
20  
21  
22  
23  
24  
25  
26  
27  
28  
29  
30  
31  
32  
33  
34  
35  
36  
37  
38  
39  
40  
41  
42  
43  
44  
45  
46  
47  
48  
49  
50  
51  
52  
53  
54  
55  
56  
57  
58  
59  
60

For peer review only

## Reference List

- 1 Balogh R, Ouellette-Kuntz H, Bourne L, Lunsky Y, Colantonio A. Organising health care services for persons with an intellectual disability. *Cochrane Database Syst Rev* 2008;(4):CD007492.
- 2 Baxter H, Lowe K, Houston H, Jones G, Felce D, Kerr M. Previously unidentified morbidity in patients with intellectual disability. *Br J Gen Pract* 2006 Feb;56(523):93-8.
- 3 Felce D, Baxter H, Lowe K, Dunstan F, Houston H, Jones G, et al. The impact of checking the health of adults with intellectual disabilities on primary care consultation rates, health promotion and contact with specialists. *Journal of Applied Research in Intellectual Disabilities* 2008;21:597-602.
- 4 Kwok H, Cheung PW. Co-morbidity of psychiatric disorder and medical illness in people with intellectual disabilities. *Curr Opin Psychiatry* 2007 Sep;20(5):443-9.
- 5 Straetmans JM, van Schrojenstein Lantman-de Valk HM, Schellevis FG, Dinant GJ. Health problems of people with intellectual disabilities: the impact for general practice. *Br J Gen Pract* 2007 Jan;57(534):64-6.
- 6 van Schrojenstein Lantman-de Valk HM, Walsh PN. Managing health problems in people with intellectual disabilities. *BMJ* 2008;337:a2507.

- 1  
2  
3 7 Wullink M, Veldhuijzen W, Lantman-de Valk HM, Metsemakers JF, Dinant GJ.  
4  
5 Doctor-patient communication with people with intellectual disability--a qualitative  
6  
7 study. *BMC Fam Pract* 2009;10:82.  
8  
9  
10  
11 8 Scholte FA. European Manifesto: basic standards of healthcare for people with  
12  
13 intellectual disabilities. *Salud Publica Mex* 2008;50 Suppl 2:s273-s276.  
14  
15  
16  
17  
18 9 Michael J. Healthcare for All: Report of the Independent Inquiry into Access to  
19  
20 Healthcare for People with Learning Disabilities. London: Aldridge Press; 2008.  
21  
22  
23  
24 10 Baldor R, O'Brien JM [Internet]. Primary care of the adult with intellectual disability  
25  
26 (mental retardation). <http://www.uptodate.com/contents/2779> Last update: 2013  
27  
28 February 5 [cited 2013 Jan 23];  
29  
30  
31  
32  
33 11 Deb S, Kwok H, Bertelli M, Salvador-Carulla L, Bradley E, Torr J, et al. International  
34  
35 guide to prescribing psychotropic medication for the management of problem  
36  
37 behaviours in adults with intellectual disabilities. *World Psychiatry* 2009 Oct;8(3):181-  
38  
39 6.  
40  
41  
42  
43 12 Sullivan WF, Berg JM, Bradley E, Cheetham T, Denton R, Heng J, et al. Primary care  
44  
45 of adults with developmental disabilities: Canadian consensus guidelines. *Can Fam*  
46  
47 *Physician* 2011 May;57(5):541-68.  
48  
49  
50  
51  
52 13 International Association for the Scientific Study of Intellectual and Developmental  
53  
54 Disabilities [Internet]. <https://www.iassid.org/> Last update: 2013 February 5  
55  
56  
57  
58  
59  
60

- 1  
2  
3 14 The Norwegian Medical Association [Internet]. Allmennlegens møte med  
4 utviklingshemmede (In Norwegian). [http://nettkurs.legeforeningen.no/course/view](http://nettkurs.legeforeningen.no/course/view.php?id=47)  
5 [http://nettkurs.legeforeningen.no/course/view](http://nettkurs.legeforeningen.no/course/view.php?id=47)  
6 php?id=47 Last update: 2013 January 4  
7  
8  
9  
10  
11 15 Maulik PK, Mascarenhas MN, Mathers CD, Dua T, Saxena S. Prevalence of intellectual  
12 disability: a meta-analysis of population-based studies. *Res Dev Disabil* 2011  
13 Mar;32(2):419-36.  
14  
15  
16  
17  
18  
19  
20 16 Kerker BD, Owens PL, Zigler E, Horwitz SM. Mental health disorders among  
21 individuals with mental retardation: challenges to accurate prevalence estimates. *Public*  
22 *Health Rep* 2004 Jul;119(4):409-17.  
23  
24  
25  
26  
27  
28  
29 17 Allen D. The relationship between challenging behaviour and mental ill-health in people  
30 with intellectual disabilities: a review of current theories and evidence. *J Intellect*  
31 *Disabil* 2008 Dec;12(4):267-94.  
32  
33  
34  
35  
36  
37 18 Holden B, Gitlesen JP. The relationship between psychiatric symptomatology and  
38 motivation of challenging behaviour: a preliminary study. *Res Dev Disabil* 2008  
39 Sep;29(5):408-13.  
40  
41  
42  
43  
44  
45  
46 19 Berardi D, Bortolotti B, Menchetti M, Bombi A, Tarricone I. Models of collaboration  
47 between general practice and mental health services in Italy. *The European Journal of*  
48 *Psychiatry* 2007;21:79-84.  
49  
50  
51  
52  
53  
54  
55  
56  
57  
58  
59  
60

- 1  
2  
3 20 Fredheim T, Danbolt LJ, Haavet OR, Kjongsberg K, Lien L. Collaboration between  
4  
5 General Practitioners and mental health care professionals: a qualitative study. *Int J*  
6  
7 *Ment Health Syst* 2011 May 23;5(1):13.  
8  
9  
10  
11 21 Fredheim T, Lien L, Danbolt LJ, Kjongsberg K, Haavet OR. Experiences with general  
12  
13 practitioners described by families of children with intellectual disabilities and  
14  
15 challenging behaviour: a qualitative study. *BMJ Open* 2011;1(2):e000304.  
16  
17  
18  
19  
20 22 Younes N, Gasquet I, Gaudebout P, Chaillet MP, Kovess V, Falissard B, et al. General  
21  
22 Practitioners' opinions on their practice in mental health and their collaboration with  
23  
24 mental health professionals. *BMC Fam Pract* 2005 May 2;6(1):18.  
25  
26  
27  
28  
29 23 Hassiotis A, Barron DA, Hall IS. Intellectual disability psychiatry: a practical handbook.  
30  
31 Chichester, West Sussex, England; Wiley-Blackwell; 2009.  
32  
33  
34  
35 24 Wilkinson J, Dreyfus D, Cerreto M, Bokhour B. "Sometimes I feel overwhelmed":  
36  
37 educational needs of family physicians caring for people with intellectual disability.  
38  
39 *Intellect Dev Disabil* 2012 Jun;50(3):243-50.  
40  
41  
42  
43 25 Gill F, Stenfert KB, Rose J. General practitioners' attitudes to patients who have  
44  
45 learning disabilities. *Psychol Med* 2002 Nov;32(8):1445-55.  
46  
47  
48  
49  
50 26 Neville BG. Mental health services for people with learning disabilities. Medical needs  
51  
52 are important too. *BMJ* 2001 Feb 3;322(7281):302.  
53  
54  
55  
56  
57  
58  
59  
60

- 1  
2  
3 27 Kvale S, Brinkmann S. Interviews: learning the craft of qualitative research  
4  
5 interviewing. Los Angeles, Calif.: Sage; 2009.  
6  
7  
8  
9 28 Malterud K. The art and science of clinical knowledge: evidence beyond measures and  
10  
11 numbers. *Lancet* 2001 Aug 4;358(9279):397-400.  
12  
13  
14  
15 29 Giorgi A. Phenomenology and psychological research: essays. Pittsburgh, Pa.:  
16  
17 Duquesne University Press; 1985.  
18  
19  
20  
21  
22 30 Giorgi A. The descriptive phenomenological method in psychology: a modified  
23  
24 Husserlian approach. Pittsburgh: Duquesne university press; 2009.  
25  
26  
27  
28 31 Sackett DL, Rosenberg WM, Gray JA, Haynes RB, Richardson WS. Evidence based  
29  
30 medicine: what it is and what it isn't. *BMJ* 1996 Jan 13;312(7023):71-2.  
31  
32  
33  
34 32 Brylewski J, Duggan L. Antipsychotic medication for challenging behaviour in people  
35  
36 with learning disability. *Cochrane Database Syst Rev* 2004;(3):CD000377.  
37  
38  
39  
40  
41 33 Matson JL, Bamburg JW, Mayville EA, Pinkston J, Bielecki J, Kuhn D, et al.  
42  
43 Psychopharmacology and mental retardation: a 10 year review (1990-1999). *Res Dev*  
44  
45 *Disabil* 2000 Jul;21(4):263-96.  
46  
47  
48  
49 34 Tyrer P, Oliver-Africano PC, Ahmed Z, Bouras N, Cooray S, Deb S, et al. Risperidone,  
50  
51 haloperidol, and placebo in the treatment of aggressive challenging behaviour in patients  
52  
53 with intellectual disability: a randomised controlled trial. *Lancet* 2008 Jan  
54  
55 5;371(9606):57-63.  
56  
57  
58  
59  
60

- 1  
2  
3 35 Baasland G, Engedal K. [Use of psychotropic medication among individuals with  
4 mental retardation]. *Tidsskr Nor Laegeforen* 2009 Sep 10;129(17):1751-3.  
5  
6  
7  
8  
9 36 Holden B, Gitlesen JP. Psychotropic medication in adults with mental retardation:  
10 prevalence, and prescription practices. *Res Dev Disabil* 2004 Nov;25(6):509-21.  
11  
12  
13  
14  
15 37 Campbell SM, Gately C, Gask L. Identifying the patient perspective of the quality of  
16 mental healthcare for common chronic problems: a qualitative study. *Chronic Illn* 2007  
17 Mar;3(1):46-65.  
18  
19  
20  
21  
22  
23  
24  
25  
26  
27  
28  
29  
30  
31  
32  
33  
34  
35  
36  
37  
38  
39  
40  
41  
42  
43  
44  
45  
46  
47  
48  
49  
50  
51  
52  
53  
54  
55  
56  
57  
58  
59  
60



1  
2  
3 **Intellectual disability and mental health problems:**  
4  
5  
6 **a qualitative study of general practitioners' views**  
7  
8  
9

10 Terje Fredheim<sup>1,4\*</sup>, Ole R Haavet<sup>4</sup> Lars J Danbolt<sup>1,3</sup>, Kari Kjønberg<sup>1</sup>, Lars Lien<sup>1,2</sup>,  
11  
12

13  
14  
15 <sup>1</sup>Centre for Psychology of Religion, Innlandet Hospital Trust (SIHF), Hamar, Norway  
16

17 <sup>2</sup> Faculty of public health, University College of Hedmark, Elverum, Norway  
18

19 <sup>3</sup>Norwegian School of Theology, Oslo, Norway  
20

21 <sup>4</sup>Department of General Practice, University of Oslo, Oslo, Norway  
22  
23  
24

25  
26 \* Corresponding Author:  
27

28 Terje Fredheim, Religionspsykologisk Senter, Postboks 68, N-2312 Ottestad  
29

30 E-mail: [terje.fredheim@sykehuset-innlandet.no](mailto:terje.fredheim@sykehuset-innlandet.no)  
31  
32

33 Phone: 0047 - 41219155  
34  
35  
36  
37  
38  
39  
40  
41  
42  
43  
44  
45  
46  
47  
48  
49  
50  
51  
52  
53  
54  
55  
56  
57  
58  
59  
60

## Article summary

### Article focus

- The aim of this study was to investigate the general practitioners (GPs) experiences in managing people with intellectual disabilities and mental/behavioural problems (MBP) in order to identify factors related to high quality services, important areas for improvement and suggest fields for further exploration.

### Key messages

- This study shows that GPs have different opinions on central subjects in providing high quality services to people with ID and MBP.
- Even GPs with an assumed high competence and engagement in this patient group, lack evidence based knowledge and base their actions on experience based practice.
- GPs are concerned about the competence in specialist departments when it comes to treatment of MBP in people with ID

### Strengths and limitations in this study

- Participants were of both genders, from several localities and had a broad range of patients with ID and MBP.
- As far as we know, this is the only study that has addressed GPs experiences with people with ID and MBP.
- Although data across participants were found sufficient, a small group of participants were interviewed.

## Abstract

**Objectives** To investigate general practitioners' (GPs) experiences in managing patients with intellectual disabilities (ID) and mental and behavioural problems (MBP).

**Design** Qualitative study using in-depth interviews.

**Setting** General practice in Hedmark County, Norway.

**Participants** 10 GPs were qualitatively interviewed about their professional experience regarding patients with ID and MBP. Data were analysed by all authors using systematic text condensation.

**Results** The participants' knowledge was primarily experience based and collaboration with specialists seemed to be individual rather than systemic. The GPs provided divergent attitudes to referral, treatment, collaboration, regular health checks and home visits.

**Conclusions** GPs are in a position to provide evidence-based and individual treatment for both psychological and somatic problems among patients with ID. However, they do not appear to be making use of evidence-based treatment decisions. The GPs feel that they are left alone in decision making, and find it difficult to find trustworthy collaborative partners. The findings in this study provide useful information for further research in the field.

## Introduction

People with intellectual disabilities (ID) are particularly vulnerable to health problems and experience difficulties in meeting their health care needs.<sup>1-7</sup> Two recent attempts provide a focus to this challenge: a consensus manifesto by the European Association of Intellectual Disability Medicine<sup>8</sup> and an independent inquiry on a request from the British Secretary of State for Health.<sup>9</sup> These reports share the goal of improving health care services for people with ID, but the extent to which their recommendations have been implemented remains dubious. Similarly, guidelines have been developed in other countries.<sup>10-12</sup> Courses are also available, for instance in Norway an internet course from the Norwegian Medical Association<sup>14</sup>, and internationally a course from the International Association for the Scientific Study of Intellectual and Developmental Disabilities (IASSID).<sup>13</sup> It is however not clear how widely such training programs for GPs are used.

A recent meta-analysis has shown that the prevalence of ID is approximately 1%.<sup>15</sup> Prevalence of mental health problems among people with ID vary in different studies from 14% to 60% and can be difficult to identify and diagnose.<sup>16</sup> There is considerable overlap between mental health problems and challenging behaviour<sup>17,18</sup>; these two complications are often inseparable, suggesting that there is little to gain from distinguishing between them when trying to identify implications for health workers. To detect and treat people with ID and mental and behaviour problems (MBP) is a test of the competence of the general practitioner (GP). Doctors specialising in general practice acquire knowledge about the early and general presentation of diseases, and early treatment and follow-up of chronic disease. GPs play a central role because of their familiarity with other primary health care services, as gate-keepers to specialist health care and in evaluating treatment and cooperate with the patient, family and other service providers.<sup>19-22</sup>

1  
2  
3 Each Norwegian GP has 5 to 10 patients with ID on their list. Some of these patients  
4 will have MBP, which potentially influences their physical health, including poor diet; erratic  
5 compliance with medication; and behaviour that can affect physical health, creating the need  
6 for close care and structure in health services.<sup>23</sup> A qualitative study has identified areas of  
7 discomfort when it comes to proper educational training for GPs, to meet the health needs of  
8 people with ID.<sup>24</sup> Results from another qualitative study with participants with ID showed  
9 that the participants wanted GPs with ability to listen interestingly, take the patient seriously  
10 and take the time to explain and demonstrate medical investigations.<sup>7</sup> GPs attitudes towards  
11 people with ID were investigated in a study. Although GPs held positive attitudes to  
12 managing ID patients they were not so willing to give more time in consultation.<sup>25</sup>  
13  
14  
15  
16  
17  
18  
19  
20  
21  
22  
23  
24

25 The importance of closely monitored care and high-quality health services to meet the  
26 challenge of inequality in health services for people with ID has provided the focus for several  
27 papers.<sup>1,3,5,6,26</sup> There are however few studies that have looked at the way GPs are working  
28 with patients with ID and MBP. The aim of our research was to explore the experiences,  
29 attitudes and perceived role and competence of GPs providing health services to patients with  
30 ID, with a special focus on patients with ID and MBP.  
31  
32  
33  
34  
35  
36  
37  
38

## 39 METHODS

### 40 A qualitative method

41 We opted for a qualitative approach, in order to obtain more detailed descriptions of the GPs'  
42 experiences serving patients with ID and MBP. In-depth interviews are suitable in inquiring  
43 about the GP's experiences, facilitating a deeper understanding of their opinions and  
44 attitudes.<sup>27,28</sup> We preferred open interviews to focus on each participant's descriptions and  
45 experiences, and bringing narratives into the method, by giving participants the opportunity to  
46 provide meaning to their responses.  
47  
48  
49  
50  
51  
52  
53  
54  
55  
56  
57  
58  
59  
60

## Participants

Data were drawn from a total of 10 interviews with 10 participating GPs aged 41 to 64 (table 1). Participants were chosen following recommendations from an acknowledged senior psychiatrist with more than 30 years of experience with ID patients in collaboration with GPs in Hedmark County. There are 173 GPs in Hedmark, and the senior psychiatrist considered 25 of them to have more than the usual level of experience with ID patients and a relatively large number of ID patients on their list. A letter was sent to 15 of these GPs, purposefully selected with regard to geographical location and gender. 10 GPs were able to participate, 3 GPs refused to participate, and 2 GPs did not respond. Participation in this study was voluntary, and each participant signed an informed consent form, and was informed of their right to withdraw from the study at any time, without further explanation.

TABLE 1

| Participant number | Age | Gender | Location | Total number of patients | Approximate number of ID patients | Reported number. of ID patients with psychiatric/behavioural challenge |
|--------------------|-----|--------|----------|--------------------------|-----------------------------------|------------------------------------------------------------------------|
| 1                  | 58  | F      | Rural    | 950                      | 6                                 | 2                                                                      |
| 2                  | 61  | M      | City     | 1200                     | 3                                 | 2                                                                      |
| 3                  | 60  | M      | Rural    | 800                      | 14                                | 4                                                                      |
| 4                  | 64  | M      | City     | 2500                     | 20                                | 10                                                                     |
| 5                  | 60  | M      | Rural    | 750                      | 15                                | 6                                                                      |
| 6                  | 61  | M      | City     | 1000                     | 5                                 | ?                                                                      |
| 7                  | 60  | M      | City     | 1100                     | 30                                | 20                                                                     |
| 8                  | 42  | F      | Rural    | 850                      | 7                                 | 3                                                                      |
| 9                  | 59  | M      | Rural    | 1000                     | 12                                | 6                                                                      |
| 10                 | 41  | F      | Rural    | 1300                     | 10                                | 5                                                                      |

*Participants' number, age, gender, location, total number of patients, approximately number of patients with ID, and reported number of ID-patients with mental or behavioural problems*

## Setting

All 10 interviews were conducted in the GPs' offices, located in Hedmark county, an agricultural county with small towns and a total population of approximately 190 000. The interviews lasted 41–81 minutes, with a mean of 57 minutes. Interviews were conducted from October to November 2011 and were audio recorded. All but one interview was conducted by two of the authors (TF and KK), and there were no former relationship between the participants and the interviewers. The interviews were planned, the participants were prepared on the topic and had allocated time for the interview. The interview consisted of open-ended questions based on an interview guide with two main questions:

1. What are your experiences with ID patients who have additional mental health problems and/or challenging behaviour?
2. What do you think is the GP's role for these patients?

The additional checklist was used to gather information that was otherwise missing or to provide greater depth or breadth to incomplete information. Follow-up questions were taken from a list of keywords; number of patients with ID on the GP's patient list, collaborative partners, regular health checks, specific training on the topic, perceived knowledge, knowledge of evidence based literature on the topic and attitude towards psychotropic treatment of people with ID.

## Analysis

The interviewers made field notes with the participants' frequently used words, phrases and other statements requiring follow-up. Pauses, engagement, laughter and gestures were also noted, and the field notes were used in addition to the total transcripts. The 10 interviews generated approximately 119 pages of single-spaced text. Analysis of transcripts was

1  
2  
3 conducted using systematic text condensation.<sup>27,29,30</sup> The first author read the transcripts  
4  
5 several times to obtain a sense of the whole. The other authors independently read the  
6  
7 transcripts and identified meaningful units, themes and subthemes, trying to capture the  
8  
9 “essential expression”. These findings were discussed among the authors.  
10

## 11 12 13 RESULTS

14  
15  
16 During the interview, GPs described their experiences, consultations and collaboration with a  
17  
18 variety of relatives and professionals. Case presentations included descriptions of ID patients  
19  
20 with complex medical, psychiatric and behavioural challenges. GPs shared examples of what  
21  
22 kind of challenges they were faced with managing these patients. It could be a patient with  
23  
24 Down syndrome, psychiatric illness and difficult to control diabetes. Other patients could be  
25  
26 aggressive both verbally and physically and not willing to participate in tests in a typical  
27  
28 consultation at the doctor’s office. Some of the patients lived alone with little community  
29  
30 services, and were having a lifestyle with several potential harmful traits, like smoking,  
31  
32 drinking alcohol or eating disorders, and limited cognitive resources to understand the  
33  
34 consequences of their actions.  
35  
36

37  
38 As a model of analysis, the process of a consultation emerged from the material as the  
39  
40 best description of the GPs’ experiences with this group of patients (figure 1). This model  
41  
42 illustrates a GP’s pathway through a consultation with four main categories: basis for  
43  
44 decisions, consultation, treatment and follow-up.  
45  
46

47  
48 -----  
49  
50 Figure 1 approximately here  
51  
52 -----  
53  
54  
55  
56  
57  
58  
59  
60



## Basis for decisions

The main category, *basis for decisions*, epitomizes the GP's knowledge and experience in the context of the patient group and describes their medical education, experiences, courses and relevant post-graduate education on this topic. The GPs described limited training in patients with ID from their medical school or post-graduate courses. On direct question, none of the GPs' had knowledge of The Medical Associations internet-based course on the topic.

*The Norwegian Medical Association arranges a lot of courses, but I have until today's date never seen a course on this topic. (GP #6)*

When the GPs' were directly asked on what basis they treated these patients there was no mention of articles, books or peer-reviewed journals on the topic:

*I think... those medications that I am used to prescribing, and that I know are effective in any or another way, I will use them as a common guideline. (GP #1)*

*I have common knowledge about patients and psychiatry. I have a large number of patients and I have years of experience. (GP #4)*

*It might be revealing, but I use common sense and my own experiences. (GP #9)*

*I haven't read any literature on this theme, but I have learned some in collaborating with Habilitation services. (GP #6)*

1  
2  
3 Knowledge of the patients' background and continuity in the relationship between  
4 patient and physician were seen as key issues in providing the best service. Furthermore these  
5 GPs saw the advantage of being a family doctor, improving the relationship to the patients  
6 allowing the GP to make a better job of evaluating the biological, psychological and social  
7 strengths of the patients. As one participant said:  
8  
9  
10  
11  
12

13  
14  
15  
16 *The family will be a support system for the patient anyway, so I see this as a great*  
17 *advantage. (GP #6)*  
18  
19

20  
21  
22  
23 *A patient of me, his sister and sister's child are my patients. His sister has been here,*  
24 *lying on the bench pregnant. He knows this, and we talk a little about it. It seems to*  
25 *make him more comfortable and familiar with the situation when he knows I am*  
26 *helping more of his family as well. I can measure his blood pressure and do blood*  
27 *samples, some thing he was not able to do at his former GP. (GP #1)*  
28  
29  
30  
31  
32  
33

34  
35  
36 A key finding in this category is that most of the treatment is founded on experience-  
37 based knowledge. The material was rich in descriptions of patient histories, organisational  
38 system changes and historical events in the ID health care service, together with private  
39 memories from childhood or random meetings with people with intellectual disability.  
40 Because experiences are individual, there were many different stories, opinions and points of  
41 view.  
42  
43  
44  
45  
46  
47  
48  
49  
50  
51

52 *Already in primary school I went to a school where people with ID were integrated.*  
53 *Having contact with people with ID has never been strange or unfamiliar for me. (GP*  
54 *#8)*  
55  
56  
57  
58  
59  
60

## Consultation

The second main category, *consultation*, covers type of consultation, communication and individual routines or rituals by either the GP or the patient. First there are descriptions of various types of consultations which can occur in either the office or the patient's home: acute consultation, planned evaluations of treatment and prescriptions, and health checks. The GPs varied in their opinions about the benefits and possibilities of seeing the patient at home, as quotes from these two doctors illustrate:

*Home visits are soon to become a closed chapter in general practice, but with these patients I find it necessary to do home visits. Then I can see with my own eyes how things appear at home (GP #5).*

*They need to be observed and... it is not always easy for a GP to be able to observe. A GP should stay in the office and be available for patients (GP #4).*

Furthermore the GPs have different opinions about the benefits and possibilities of regular health checks for this patient group. Lack of standard guidelines opens the door for individual solutions and a variety of explanations. One participant highlighted this patient group as bad requesters of health care, requiring closer follow-up:

*We may not be optimally good at this, but we try to do it once a year, and that is about were it ends. Some have a health problem that leads to more frequent consultations; in those cases a yearly health control is less important. But in general these are patients who don't tend to promote themselves. (GP #9)*

1  
2  
3  
4  
5 There were descriptions of patients who went through special routines and rituals in  
6  
7 their GP's office. It seemed to be important for the relationship between the GP and the  
8  
9 patient that these routines be followed; the patient tended to be calmer allowing the doctor to  
10  
11 undertake the necessary investigations. As one participant said:  
12  
13

14  
15  
16 *He is sitting here, takes a glass of water, sits down again and drinks some water.*

17  
18 *Sometimes I am able to check his blood pressure and do blood tests. He was not able*  
19  
20 *to do that with his previous GP (GP #1).*  
21  
22

23  
24  
25 Communication and observation is another cluster of experiences in this category. Some of  
26  
27 these patients are obviously anxious about a consultation, and all GPs said that their focus was  
28  
29 on the patient, communicating directly with the ID patients, even though they were  
30  
31 accompanied by others. If something could not be done because of unwillingness or  
32  
33 restlessness, they did not push the patient, but booked another appointment in the near future.  
34  
35

36  
37 Our participants argued that their patients' should be accompanied by someone who  
38  
39 knows the patient, their medical history and the reason for the consultation. Yet patients with  
40  
41 communication problems were sometimes accompanied to the doctor's office by health  
42  
43 workers with limited knowledge of the patient. Because GPs must rely on information from  
44  
45 accompanying persons, they would sometimes send the patient home with a new appointment.  
46  
47

48 As one participant said:  
49  
50

51  
52 *It is essential that we have confidence in the information we are given. And that it is*  
53  
54 *not exaggerated, hyped or trivialized, but is a sober description that it is possible for*  
55  
56 *me as a GP to navigate towards (GP #7).*  
57  
58  
59  
60

1  
2  
3  
4  
5 Some participants were more likely to use systematic consultations and follow-up,  
6 especially if the patient had chronic somatic problems. Nevertheless, the somatic problem,  
7 rather than the ID and MBP constituted the main reason for systematic and frequent  
8 consultations.  
9  
10  
11  
12  
13

## 14 **Treatment**

15  
16  
17 This third main category covers the choice the GP must make in trying to solve the patient's  
18 medical or mental health problem: to treat the patient or refer to a specialist. The participants  
19 expressed insecurity about how to treat and what to do with these patients. They described  
20 types and possibilities when they wanted to treat the patient themselves following these  
21 justifications: i) lack of confidence that a specialist would do the best job with these patients  
22 or ii) they believed the referral would be refused by the specialists' health services. This  
23 participant illustrates the lack of confidence in specialist services, and trust in own  
24 competence:  
25  
26  
27  
28  
29  
30  
31  
32  
33  
34  
35  
36  
37

38 *I have to call a random chief doctor at the local psychiatric institution, because that is*  
39 *what the habilitation services relies on... then I think I will do this better by myself.*  
40  
41  
42 *(GP #5)*  
43  
44  
45

46  
47 There were descriptions of all types of treatment, including check for somatic reasons for  
48 restlessness, behaviour modification, environmental actions and medical treatment. When the  
49 participants' referred these patients to specialist health services for their MBP, it was mainly  
50 for diagnostic work or medication queries. It was more common for the GPs to mention the  
51 name of a specialist rather than a specialist department.  
52  
53  
54  
55  
56  
57  
58  
59  
60

1  
2  
3 *If I wanted to refer a patient with these problems, NN was the person. (GP #3)*  
4  
5  
6

7 *NN2, a psychiatrist with long experience, is easy to turn to, because he provides good*  
8  
9 *answers to my questions. (GP #8)*  
10  
11

12  
13  
14 Some of the GPs interviewed had created a private system to ensure systematic  
15  
16 follow-up: prescribing medication over the short term and developing exclusive lists with  
17  
18 patient data and consultation frequency.  
19

## 20 21 **Evaluation and continuing treatment** 22

23  
24 This fourth main category constitutes a cluster of descriptions covering collaboration,  
25  
26 evaluation of treatment effects and routines for follow-up consultations. The participants  
27  
28 reported their experiences with collaborative partners – particularly how they evaluated the  
29  
30 effects of psychotropic medication.  
31  
32

33 A patient with ID and MBP nearly always involves one or more collaborative partners.  
34  
35 Interdisciplinary meetings were described as useful if the GPs had the opportunity to  
36  
37 participate. The GPs were not sure if they were invited to all meetings, but had the impression  
38  
39 that their attendance and competence was wanted. There were descriptions of meetings with  
40  
41 parents, community mental health workers, psychiatrists, psychologists and nursing home  
42  
43 employees, but they differed in type, in the frequency of the GPs' attendance and in the  
44  
45 priority they placed on them.  
46  
47  
48

49  
50  
51 *I try to attend every primary meeting with collaborative partners. (GP #9)*  
52  
53

54  
55  
56 *I am not often called in to primary meetings. I am, in a few cases, where medical*  
57  
58 *issues are central. (GP #7)*  
59  
60

1  
2  
3  
4  
5 The GPs that attended usually found meetings with collaborators useful, despite the fact that  
6  
7 most of these meetings dealt with issues far from the GPs' areas of expertise. Some described  
8  
9 meetings in which specific parts were structured towards their attendance, and this was  
10  
11 considered to lower the barriers of GP attendance. Even though the GPs met a group of  
12  
13 several collaborators facing the challenges of a patient, they felt alone in issues regarding  
14  
15 medical questions for patients with ID and MBP. The feeling of being left alone was  
16  
17 mentioned by several participants, but one participant was particularly clear about it:  
18  
19

20  
21  
22  
23 *I feel really alone on this topic with these patients. I don't really know what to do. (GP*  
24  
25 *#10)*

26  
27  
28  
29 The participants admit facing challenges in evaluating the effects of psychotropic  
30  
31 medication. Some argued for systematic evaluation of and specific feedback on their patients'  
32  
33 behaviour by parents or health care workers, in order to assess the effect of medication:  
34  
35

36  
37  
38 *I need observations and detailed feedback. There's no point in continuing a treatment*  
39  
40 *if it isn't effective. Systematic feedback is the required way of working. (GP #7)*  
41  
42

43  
44  
45 Others wanted a standard feedback sheet:

46  
47  
48  
49 *Then you can have a summary over a longer time perspective, rather than some*  
50  
51 *random reports. But I don't know where to get these schemes. (GP #10)*  
52  
53  
54  
55  
56  
57  
58  
59  
60

1  
2  
3 As schemes or more objective feedback forms were not often provided, the participants were  
4  
5 forced to rely upon normative assessments provided by accompanying health workers or  
6  
7 parents.  
8  
9

## 10 DISCUSSION

### 14 Summary of main findings

16  
17 The results in this study highlight the complexity of providing GP services to people with ID  
18 and MBP. The GPs interviewed in this study were strategically selected and were expected to  
19 have above-average engagement and competence with this patient group. Evidence-based  
20 medicine requires a combination of clinical expertise, best available external evidence and  
21 individual patient needs and choices.<sup>31</sup> The competence of the participants in this study is  
22 generally experience-based on this topic and therefore characterised by individual opinions  
23 and ways of working. The participants described limited education on ID issues, and none  
24 could refer to any scientific article, book or report on this topic. Even though there has been a  
25 course directed to GPs on ID patients, with a subcategory on MBP, none of the participants  
26 had attended it. This study implies that GPs with more than usual level of experience and  
27  
28 interest in patients with ID and MBP, **rely** on experience based knowledge, and have limited  
29  
30 knowledge of articles, guidelines, reports or books on this topic. The fact that **management of**  
31  
32 patients with ID and MBP **rarely** is taught in medical school and the only course available is  
33  
34 an *internet course* may contribute to the understanding of limited evidence based knowledge  
35  
36 among the participants. In addition, our results imply that this topic is rarely mentioned in  
37  
38 scientific papers or on conferences and courses with GP participation.  
39  
40  
41  
42  
43  
44  
45  
46  
47  
48  
49  
50  
51  
52  
53  
54  
55  
56  
57  
58  
59  
60



## Strengths and limitations of the study

The participants in this study were strategically selected, thereby representing a relatively homogenous group. This situation creates an obvious threat to external validity, and may limit the generalisation of our results. Nevertheless the interviewees revealed diverse opinions and descriptions of their managing of ID patients with MBP, thereby strengthening our impression that this is an important research topic, albeit rarely investigated or highlighted in national or international settings. Everyone in our research group has read and analysed the transcripts and independently noted meaningful units. The group comprises researchers and clinicians from several areas, thereby limiting the threat of a subjective finding with idiosyncratic perspectives and limited objective value. Our findings can be transferred to clinical situations and can provide a good starting point for further research in the field.

## Comparison with existing literature

There is no hard evidence for the necessity and efficacy of using psychotropic medication for treating MBP in people with ID.<sup>11,32-34</sup> The fact that none of the GPs interviewed could mention any scientific paper that addresses this problem supports the finding that this as an experience-based field, in which doctors rely on general competence valid for people without ID. This is a noteworthy result, especially given the assumption that 70% of psychotropic medication to this patient group is prescribed by the GP alone, without collaboration with a psychiatrist.<sup>35,36</sup> Furthermore the results are in line with findings from another qualitative study that addressed the educational needs of family physicians of people with ID, pointing out a need for modifications of their education.<sup>24</sup> The GPs interviewed focused on communicating with the person with ID, giving them time to do their rituals, and the importance of building relations with the patients. People with ID have provided useful information in a qualitative study, focusing on the importance of practical issues like patience, demonstrations of medical investigations and communication with the patient, not the support

1  
2  
3 person.<sup>7</sup> These attributes of a good patient doctor relation are also mentioned by patients with  
4  
5 chronic problems without ID.<sup>37</sup>  
6  
7

## 8 **Implications for future research and clinical practice**

9  
10  
11 The results demonstrate a major challenge to treatment of MBP in people with ID: None of  
12  
13 the participants was sure how to treat these patients themselves, yet they were unsure where to  
14  
15 refer their patients if they found the situation too complicated for primary health care  
16  
17 treatment alone. They tended to distrust specialist health services. In some areas of the county,  
18  
19 the GPs mentioned a local hospital psychiatrist, and other participants mentioned specific  
20  
21 persons with whom they could collaborate. All in all, these statements serve to underline the  
22  
23 importance of knowledge and information exchange between potential collaborative partners.  
24  
25

26  
27 Our study shows that GPs' managing of patients with ID and MBP is primarily based  
28  
29 upon experience-based knowledge – as told explicitly and as demonstrated through individual  
30  
31 descriptions of managing and treatment. The GPs' opinions about working with ID patients is  
32  
33 based on their own experience with this patient group, and with their general competence  
34  
35 related to patients without ID. Attention should be focused on the ways in which medical  
36  
37 training and post-graduate education can fill the competence gap, to ensure that this field  
38  
39 becomes evidence-based rather than merely experience-based. Guidelines for GP  
40  
41 management of people with ID, with a subcategory focusing on MBP should be developed  
42  
43 and disseminated in Norway.  
44  
45  
46  
47  
48  
49  
50  
51  
52  
53  
54  
55  
56  
57  
58  
59  
60

## Acknowledgements

The authors would like to thank the GPs for their participation. We gratefully acknowledge the fact that the research is funded by The Norwegian Medical Association, but the views expressed are those of the authors alone.

## Funding

This study was funded by the Norwegian Medical Association. The funding body had no involvement in the research process or in the writing of this article.

## Competing interests

All authors have completed the ICMJE uniform disclosure form at [www.icmje.org/coi\\_disclosure.pdf](http://www.icmje.org/coi_disclosure.pdf) (available on request from the corresponding author) and declare: no support from any organisation for the submitted work; no financial relationships with any organisations that might have an interest in the submitted work in the previous three years; and no other relationships or activities that could appear to have influenced the submitted work.

## Ethics approval

The Norwegian regional committee for medical research approved this study, [ethical approval number 10-2008 SI](#).

## Contributors

TF contributed to acquisition of data, transcription, analysing data, drafting and critical revision of the article and approval of the final version. ORH, LJD and LL contributed to the design of the study, analysing data, critical revision of the article and approval of the final

1  
2  
3 version. KK participated in the interviews, analysing data, critical revision of the article and  
4  
5 approval of the final version.  
6  
7

### 8 **Data sharing** 9

10 No additional data available.  
11  
12  
13  
14  
15  
16  
17  
18  
19  
20  
21  
22  
23  
24  
25  
26  
27  
28  
29  
30  
31  
32  
33  
34  
35  
36  
37  
38  
39  
40  
41  
42  
43  
44  
45  
46  
47  
48  
49  
50  
51  
52  
53  
54  
55  
56  
57  
58  
59  
60

For peer review only

## Reference List

- 1 Balogh R, Ouellette-Kuntz H, Bourne L, Lunsky Y, Colantonio A. Organising health care services for persons with an intellectual disability. *Cochrane Database Syst Rev* 2008;(4):CD007492.
- 2 Baxter H, Lowe K, Houston H, Jones G, Felce D, Kerr M. Previously unidentified morbidity in patients with intellectual disability. *Br J Gen Pract* 2006 Feb;56(523):93-8.
- 3 Felce D, Baxter H, Lowe K, Dunstan F, Houston H, Jones G, et al. The impact of checking the health of adults with intellectual disabilities on primary care consultation rates, health promotion and contact with specialists. *Journal of Applied Research in Intellectual Disabilities* 2008;21:597-602.
- 4 Kwok H, Cheung PW. Co-morbidity of psychiatric disorder and medical illness in people with intellectual disabilities. *Curr Opin Psychiatry* 2007 Sep;20(5):443-9.
- 5 Straetmans JM, van Schrojenstein Lantman-de Valk HM, Schellevis FG, Dinant GJ. Health problems of people with intellectual disabilities: the impact for general practice. *Br J Gen Pract* 2007 Jan;57(534):64-6.
- 6 van Schrojenstein Lantman-de Valk HM, Walsh PN. Managing health problems in people with intellectual disabilities. *BMJ* 2008;337:a2507.

- 1  
2  
3 7 Wullink M, Veldhuijzen W, Lantman-de Valk HM, Metsemakers JF, Dinant GJ.  
4  
5 Doctor-patient communication with people with intellectual disability--a qualitative  
6  
7 study. *BMC Fam Pract* 2009;10:82.  
8  
9  
10  
11 8 Scholte FA. European Manifesto: basic standards of healthcare for people with  
12  
13 intellectual disabilities. *Salud Publica Mex* 2008;50 Suppl 2:s273-s276.  
14  
15  
16  
17  
18 9 Michael J. Healthcare for All: Report of the Independent Inquiry into Access to  
19  
20 Healthcare for People with Learning Disabilities. London: Aldridge Press; 2008.  
21  
22  
23  
24 10 Baldor R, O'Brien JM [Internet]. Primary care of the adult with intellectual disability  
25  
26 (mental retardation). <http://www.uptodate.com/contents/2779> Last update: 2013  
27  
28 February 5 [cited 2013 Jan 23];  
29  
30  
31  
32  
33 11 Deb S, Kwok H, Bertelli M, Salvador-Carulla L, Bradley E, Torr J, et al. International  
34  
35 guide to prescribing psychotropic medication for the management of problem  
36  
37 behaviours in adults with intellectual disabilities. *World Psychiatry* 2009 Oct;8(3):181-  
38  
39 6.  
40  
41  
42  
43 12 Sullivan WF, Berg JM, Bradley E, Cheetham T, Denton R, Heng J, et al. Primary care  
44  
45 of adults with developmental disabilities: Canadian consensus guidelines. *Can Fam*  
46  
47 *Physician* 2011 May;57(5):541-68.  
48  
49  
50  
51  
52 13 International Association for the Scientific Study of Intellectual and Developmental  
53  
54 Disabilities [Internet]. <https://www.iassid.org/> Last update: 2013 February 5  
55  
56  
57  
58  
59  
60

- 1  
2  
3 14 The Norwegian Medical Association [Internet]. Allmennlegens møte med  
4 utviklingshemmede (In Norwegian). [http://nettkurs.legeforeningen.no/course/view](http://nettkurs.legeforeningen.no/course/view.php?id=47)  
5 [http://nettkurs.legeforeningen.no/course/view](http://nettkurs.legeforeningen.no/course/view.php?id=47)  
6 php?id=47 Last update: 2013 January 4  
7  
8  
9  
10  
11 15 Maulik PK, Mascarenhas MN, Mathers CD, Dua T, Saxena S. Prevalence of intellectual  
12 disability: a meta-analysis of population-based studies. *Res Dev Disabil* 2011  
13 Mar;32(2):419-36.  
14  
15  
16  
17  
18  
19  
20 16 Kerker BD, Owens PL, Zigler E, Horwitz SM. Mental health disorders among  
21 individuals with mental retardation: challenges to accurate prevalence estimates. *Public*  
22 *Health Rep* 2004 Jul;119(4):409-17.  
23  
24  
25  
26  
27  
28  
29 17 Allen D. The relationship between challenging behaviour and mental ill-health in people  
30 with intellectual disabilities: a review of current theories and evidence. *J Intellect*  
31 *Disabil* 2008 Dec;12(4):267-94.  
32  
33  
34  
35  
36  
37 18 Holden B, Gitlesen JP. The relationship between psychiatric symptomatology and  
38 motivation of challenging behaviour: a preliminary study. *Res Dev Disabil* 2008  
39 Sep;29(5):408-13.  
40  
41  
42  
43  
44  
45  
46 19 Berardi D, Bortolotti B, Menchetti M, Bombi A, Tarricone I. Models of collaboration  
47 between general practice and mental health services in Italy. *The European Journal of*  
48 *Psychiatry* 2007;21:79-84.  
49  
50  
51  
52  
53  
54  
55  
56  
57  
58  
59  
60

- 1  
2  
3 20 Fredheim T, Danbolt LJ, Haavet OR, Kjongsberg K, Lien L. Collaboration between  
4  
5 General Practitioners and mental health care professionals: a qualitative study. *Int J*  
6  
7 *Ment Health Syst* 2011 May 23;5(1):13.  
8  
9  
10  
11 21 Fredheim T, Lien L, Danbolt LJ, Kjongsberg K, Haavet OR. Experiences with general  
12  
13 practitioners described by families of children with intellectual disabilities and  
14  
15 challenging behaviour: a qualitative study. *BMJ Open* 2011;1(2):e000304.  
16  
17  
18  
19  
20 22 Younes N, Gasquet I, Gaudebout P, Chaillet MP, Kovess V, Falissard B, et al. General  
21  
22 Practitioners' opinions on their practice in mental health and their collaboration with  
23  
24 mental health professionals. *BMC Fam Pract* 2005 May 2;6(1):18.  
25  
26  
27  
28  
29 23 Hassiotis A, Barron DA, Hall IS. Intellectual disability psychiatry: a practical handbook.  
30  
31 Chichester, West Sussex, England; Wiley-Blackwell; 2009.  
32  
33  
34  
35 24 Wilkinson J, Dreyfus D, Cerreto M, Bokhour B. "Sometimes I feel overwhelmed":  
36  
37 educational needs of family physicians caring for people with intellectual disability.  
38  
39 *Intellect Dev Disabil* 2012 Jun;50(3):243-50.  
40  
41  
42  
43 25 Gill F, Stenfert KB, Rose J. General practitioners' attitudes to patients who have  
44  
45 learning disabilities. *Psychol Med* 2002 Nov;32(8):1445-55.  
46  
47  
48  
49  
50 26 Neville BG. Mental health services for people with learning disabilities. Medical needs  
51  
52 are important too. *BMJ* 2001 Feb 3;322(7281):302.  
53  
54  
55  
56  
57  
58  
59  
60



- 1  
2  
3 27 Kvale S, Brinkmann S. Interviews: learning the craft of qualitative research  
4  
5 interviewing. Los Angeles, Calif.: Sage; 2009.  
6  
7  
8  
9 28 Malterud K. The art and science of clinical knowledge: evidence beyond measures and  
10  
11 numbers. *Lancet* 2001 Aug 4;358(9279):397-400.  
12  
13  
14  
15 29 Giorgi A. Phenomenology and psychological research: essays. Pittsburgh, Pa.:  
16  
17 Duquesne University Press; 1985.  
18  
19  
20  
21  
22 30 Giorgi A. The descriptive phenomenological method in psychology: a modified  
23  
24 Husserlian approach. Pittsburgh: Duquesne university press; 2009.  
25  
26  
27  
28 31 Sackett DL, Rosenberg WM, Gray JA, Haynes RB, Richardson WS. Evidence based  
29  
30 medicine: what it is and what it isn't. *BMJ* 1996 Jan 13;312(7023):71-2.  
31  
32  
33  
34  
35 32 Brylewski J, Duggan L. Antipsychotic medication for challenging behaviour in people  
36  
37 with learning disability. *Cochrane Database Syst Rev* 2004;(3):CD000377.  
38  
39  
40  
41 33 Matson JL, Bamburg JW, Mayville EA, Pinkston J, Bielecki J, Kuhn D, et al.  
42  
43 Psychopharmacology and mental retardation: a 10 year review (1990-1999). *Res Dev*  
44  
45 *Disabil* 2000 Jul;21(4):263-96.  
46  
47  
48  
49 34 Tyrer P, Oliver-Africano PC, Ahmed Z, Bouras N, Cooray S, Deb S, et al. Risperidone,  
50  
51 haloperidol, and placebo in the treatment of aggressive challenging behaviour in patients  
52  
53 with intellectual disability: a randomised controlled trial. *Lancet* 2008 Jan  
54  
55 5;371(9606):57-63.  
56  
57  
58  
59  
60

- 1  
2  
3 35 Baasland G, Engedal K. [Use of psychotropic medication among individuals with  
4 mental retardation]. *Tidsskr Nor Laegeforen* 2009 Sep 10;129(17):1751-3.  
5  
6  
7  
8  
9 36 Holden B, Gitlesen JP. Psychotropic medication in adults with mental retardation:  
10 prevalence, and prescription practices. *Res Dev Disabil* 2004 Nov;25(6):509-21.  
11  
12  
13  
14  
15 37 Campbell SM, Gately C, Gask L. Identifying the patient perspective of the quality of  
16 mental healthcare for common chronic problems: a qualitative study. *Chronic Illn* 2007  
17 Mar;3(1):46-65.  
18  
19  
20  
21  
22  
23  
24  
25  
26  
27  
28  
29  
30  
31  
32  
33  
34  
35  
36  
37  
38  
39  
40  
41  
42  
43  
44  
45  
46  
47  
48  
49  
50  
51  
52  
53  
54  
55  
56  
57  
58  
59  
60

1  
2  
3  
4  
5  
6  
7  
8  
9  
10  
11  
12  
13  
14  
15  
16  
17  
18  
19  
20  
21  
22  
23  
24  
25  
26  
27  
28  
29  
30  
31  
32  
33  
34  
35  
36  
37  
38  
39  
40  
41  
42  
43  
44  
45  
46  
47  
48  
49  
50  
51  
52  
53  
54  
55  
56  
57  
58  
59  
60

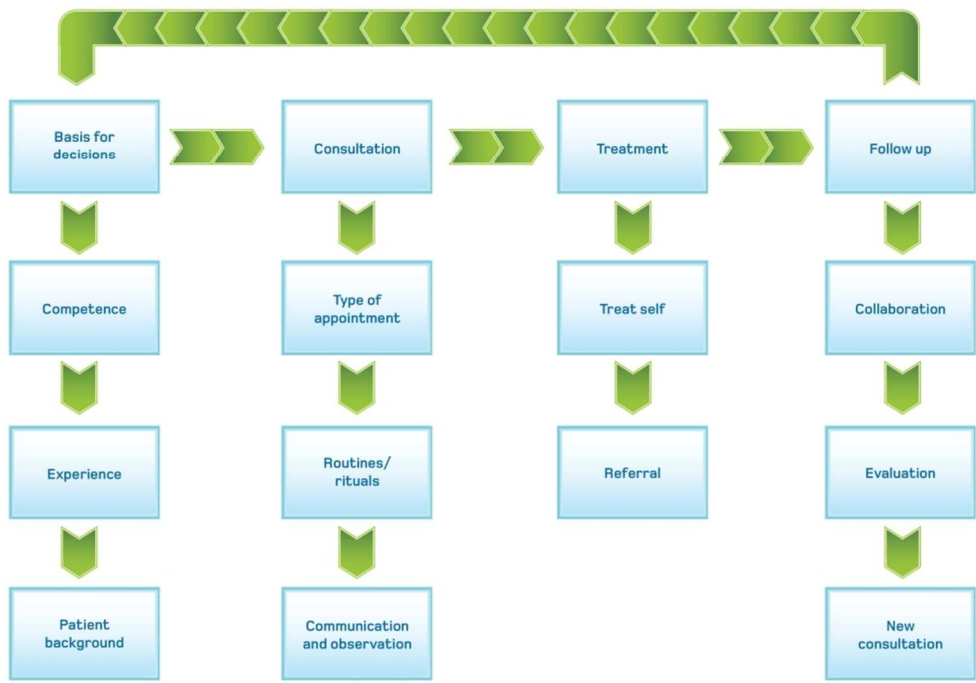

.....  
.....

90x90mm (300 x 300 DPI)

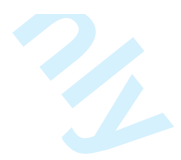

## Research check list - Fredheim et al. 2012

### **Domain 1: Research team and reflexivity**

#### **Personal characteristics**

1. Interviewer/facilitator 1: Terje Fredheim
  2. Credentials: MSc, Master of Learning in Complex Systems
  3. Occupation: PhD-student
  4. Gender: Male
  5. Experience and training: Educated in and have participated in earlier qualitative and quantitative research
- 
1. Interviewer/facilitator 2: Kari Kjøsberg
  2. Credentials: Reg. nurse, MMHC
  3. Occupation: Reg. nurse specialised in mental health care.
  4. Gender: Female
  5. Experience and training: educated in and have participated in different earlier qualitative health research studies.

#### **Relationship with participants**

6. Relationship established: There was no relationship prior to study commencement.
7. Participant knowledge of the interviewer: They were informed about researchers' professional background and interest in the project.
8. Interviewer characteristics: The interviewers' connection with specialised health care may be regarded as bias, but was considered as a minor problem. However the interviewers waited until the interview was over until they presented detailed information about prior experiences and information relevant for the topic.

### **Domain 2: Study design**

#### **Theoretical frame work**

9. Methodological orientation and theory: The study relies on a phenomenological approach with content analysis and systematic text condensation as the main method in analysing data.

#### **Participant selection**

10. Sampling: Names of possible participants were given the interviewers from a senior psychiatrist retired after decades in habilitation services. Our research group regarded this psychiatrist to be the best source to help us find the sample of participants we were looking for. The interviewers then recruited strategically from this list to represent different gender, age, diagnosis and location (rural or city).
11. Method of approach: Participants were first contacted by letter. Two or three days after likely retrieval of the letter, possible participants were contacted by telephone. Information was given and request made, and appointment made with those who were positive.
12. Sample size: Ten participants were interviewed.
13. Non-participation: Five persons refused/hesitated to participate. No drop-outs. The reason for non-participation was not asked for.

#### **Setting**

1  
2  
3 14. Setting of data collection: All interviews were conducted in the participants' office or  
4 nearby meeting room.

5 15. Presence of non-participants: None.

6 16. Description of sample: Seven males and three females were interviewed. They represented  
7 various age and location (city/rural).  
8  
9

### 10 11 12 **Data collection**

13 17. Interview guide: A guide with themes and main questions was provided by the researchers  
14 and discussed with the supervisors. Also a checklist was used to get more information on  
15 topics that seemed important or topics not mentioned by the participant. No pilot was tested.

16 18. Repeat interviews: Repeated interviews were not used. Participants were encouraged to  
17 contact the interviewers if they wanted to add something and one of them made contact by  
18 telephone to give some more information.

19 19. Audio/visual recording: Audio recording was used to collect data.

20 20. Field notes: The two interviewers made field notes during the interviews, and immediately  
21 after each interview.  
22

23 21. Duration: Interviews lasted 47 – 81 minutes.

24 22. Data saturation: Saturation and was discussed in the research group after the tenth  
25 interview had been conducted and was then regarded as satisfactory. We were open to the fact  
26 that new themes and important information could appear, but regarded the data material to  
27 contain breadth and depth for the topic investigated.

28 23. Transcripts returned: Transcripts were not returned to participants for comment or  
29 corrections.  
30

### 31 32 **Domain 3. Analysis and findings**

#### 33 34 **Data analysis**

35 24. Number of data coders: All five in the research group read the complete transcript. One of  
36 the interviewers presented identified meaningful units and themes derivated from the material  
37 and they were discussed in the research group.

38 25. Description of the coding tree: The coding tree is illustrated with a figure of major and  
39 minor themes.

40 26. Derivation of themes: Themes emerged from the data.

41 27. Software: No additional software was used.

42 28. Participant checking: Participants were offered feedback on the findings. Five of them  
43 expressed a request for feedback when the material had been accepted for publication.  
44  
45

#### 46 47 **Reporting**

48 29. Quotations presented: Participant quotations were used to illustrate findings. Quotations  
49 are not identified in this paper due to a small number of participants.

50 30. Data and findings consistent: The themes developed by the researcher(s) were logically  
51 consistent and reflective of the data.

52 31. Clarity of major themes: The major themes are described in the article, and reflect the  
53 research question.

54 32. Clarity of minor themes: Minor themes are described in the article, and reflect meaningful  
55 units. Diverse cases are described where necessary.  
56  
57  
58  
59  
60
